# Supplementary material
Source: publisher site journal article supplement (https://www.dovepress.com/get_supplementary_file.php?f=257511.xlsx)
Supplement: Supplementary file 1 [file get_supplementary_file.php]

## Sheet: Supp.Table1
Supp. Table 1: List of SERPINA1 variants available in public databases.
Reported data contains only variation from coding regions and splice site mutations, including missense, nonsense, and insertion and deletions of the ENST00000448921.5 transcript as downloaded from Ensembl genome browser (https://www.ensembl.org/index.html; 11 December 2020).
SERPINA1 variation data was submitted to VEP tool (https://www.ensembl.org/Tools/VEP; GRCh38 genome assembly ,11 December 2020) to obtain detailed information for each variant comprising frequency distribution values across the major human groups (gnomAD database) as well as qualitative and quantitative scores for a panel of 27 mutation pathogenicity predictive algorithms (SIFT, PolyPhen, CADD, C…
SERPINA1 mutations are indicated in accordance with the Human Genome Variation Society (HGVS) guidelines.
Variants arpresented in Table 1 are highlighted in green.
Marker ID	Location in Chr.14 (GRCh38)	Allele	Consequence	HGVS CDS_position	HGVS Protein_postion	cDNA_position	CDS_position	Protein_position	Amino_acids	Codons	gnomAD_AF	gnomAD_AFR_AF	gnomAD_AMR_AF	gnomAD_ASJ_AF	gnomAD_EAS_AF	gnomAD_FIN_AF	gnomAD_NFE_AF	gnomAD_OTH_AF	gnomAD_SAS_AF	CLIN_SIG	PUBMED	SIFT	PolyPhen	CADD_PHRED	Condel	BayesDel_addAF_pred	BayesDel_addAF_rankscore	BayesDel_addAF_score	ClinPred_pred	ClinPred_rankscore	DANN_rankscore	DEOGEN2_rankscore	Eigen-PC-phred_coding	Eigen-PC-raw_coding	FATHMM_converted_rankscore	GERP++_RS_rankscore	GenoCanyon_rankscore	LRT_converted_rankscore	LRT_pred	M-CAP_pred	M-CAP_rankscore	MPC_rankscore	MetaLR_pred	MetaLR_rankscore	MetaSVM_pred	MetaSVM_rankscore	MutPred_Top5features	MutPred_rankscore	MutationAssessor_rankscore
rs764249468	14:94378450-94378450	C	stop_retained_variant	ENST00000448921.5:c.1256A>G	ENSP00000416066.1:p.Ter419=	1829	1256	419	*	tAa/tGa	3.98e-06	0	0	0	5.437e-05	0	0	0	0	-	-	-	-	10.03	-	-	-	-	-	-	-	-	-	-	-	-	-	-	-	-	-	-	-	-	-	-	-	-	-
rs1566747286	14:94378453-94378453	A	missense_variant	ENST00000448921.5:c.1253A>T	ENSP00000416066.1:p.Lys418Ile	1826	1253	418	K/I	aAa/aTa	3.979e-06	6.186e-05	0	0	0	0	0	0	0	-	-	deleterious(0)	probably_damaging(0.951)	22.9	deleterious(0.839)	T	0.52422	0.00559335	D	0.68023	0.41943	0.74787	0.470712	-1.01482	0.85875	0.02121	0.74766	0.02257	N	D	0.78952	0.35486	D	0.87893	T	0.80567	Loss_of_methylation_at_K418_(P_=_2e-04),_Gain_of_stability_(P_=_8e-04),_Loss_of_disorder_(P_=_0.0144),_Loss_of_MoRF_binding_(P_=_0.0162),_Gain_of_catalytic_residue_at_T416_(P_=_0.0789)	0.44709	0.79712
rs200467663	14:94378456-94378456	A	missense_variant	ENST00000448921.5:c.1250A>T	ENSP00000416066.1:p.Gln417Leu	1823	1250	417	Q/L	cAa/cTa	3.979e-06	0	0	0	0	0	8.794e-06	0	0	-	-	deleterious(0.03)	benign(0.065)	18.08	neutral(0.369)	T	0.44453	-0.0499687	T	0.28627	0.17669	0.70131	0.554991	-0.948732	0.84628	0.15584	0.42595	0.02534	N	D	0.79254	0.04759	T	0.75288	T	0.61765	Loss_of_disorder_(P_=_0.0479),_Gain_of_MoRF_binding_(P_=_0.1409),_Loss_of_phosphorylation_at_T416_(P_=_0.2034),_Loss_of_loop_(P_=_0.2237),_Loss_of_glycosylation_at_T416_(P_=_0.2351)	0.33614	0.28956
rs3191200	14:94378460-94378460	G	missense_variant	ENST00000448921.5:c.1246A>C	ENSP00000416066.1:p.Thr416Pro	1819	1246	416	T/P	Acc/Ccc	3.978e-06	0	0	0	0	0	8.793e-06	0	0	-	-	deleterious(0.02)	possibly_damaging(0.877)	24	deleterious(0.725)	T	0.59465	0.0588225	D	0.56427	0.26427	0.77976	1.80482	-0.192082	0.8532	0.15155	0.43792	0.22613	N	D	0.74064	0.28359	D	0.87668	T	0.78228	Gain_of_catalytic_residue_at_P415_(P_=_5e-04),_Loss_of_phosphorylation_at_T416_(P_=_0.0162),_Gain_of_disorder_(P_=_0.0452),_Loss_of_MoRF_binding_(P_=_0.0469),_Gain_of_glycosylation_at_P415_(P_=_0.0589)	0.36209	0.90654
rs1566747340	14:94378461-94378462	GG	frameshift_variant	ENST00000448921.5:c.1245del	ENSP00000416066.1:p.Thr416ProfsTer44	1816-1818	1243-1245	415	P/X	CCC/CC	3.978e-06	0	2.892e-05	0	0	0	0	0	0	-	-	-	-	-	-	-	-	-	-	-	-	-	-	-	-	-	-	-	-	-	-	-	-	-	-	-	-	-	-
rs1406135754	14:94378465-94378465	A	missense_variant	ENST00000448921.5:c.1241A>T	ENSP00000416066.1:p.Asn414Ile	1814	1241	414	N/I	aAt/aTt	-	-	-	-	-	-	-	-	-	-	-	deleterious(0)	probably_damaging(0.998)	25.2	deleterious(0.919)	D	0.69062	0.147792	D	0.792	0.39449	0.86799	3.26827	0.217166	0.89692	0.5183	0.74766	0.36688	N	D	0.76388	0.35678	D	0.94919	D	0.95929	Loss_of_disorder_(P_=_0.0165),_Gain_of_catalytic_residue_at_M409_(P_=_0.0192),_Gain_of_glycosylation_at_T416_(P_=_0.0692),_Gain_of_sheet_(P_=_0.0827),_Loss_of_MoRF_binding_(P_=_0.0884)	0.77569	0.95518
rs760849035	14:94378467-94378470	CAC	inframe_deletion	ENST00000448921.5:c.1237_1239del	ENSP00000416066.1:p.Val413del	1807-1812	1234-1239	412-413	VV/V	GTGGTG/GTG	3.977e-06	0	0	0	0	0	8.791e-06	0	0	-	30223862	-	-	-	-	-	-	-	-	-	-	-	-	-	-	-	-	-	-	-	-	-	-	-	-	-	-	-	-
rs1396187932	14:94378469-94378469	G	missense_variant	ENST00000448921.5:c.1237G>C	ENSP00000416066.1:p.Val413Leu	1810	1237	413	V/L	Gtg/Ctg	-	-	-	-	-	-	-	-	-	-	-	tolerated(0.15)	benign(0.09)	8.406	neutral(0.247)	T	0.3331	-0.118867	T	0.13932	0.21065	0.61065	0.478755	-1.00822	0.84267	0.06518	0.44625	0.1534	N	D	0.67459	0.11719	T	0.79961	T	0.70064	Gain_of_catalytic_residue_at_M409_(P_=_0.027),_Loss_of_sheet_(P_=_0.0817),_Loss_of_MoRF_binding_(P_=_0.1082),_Loss_of_phosphorylation_at_T416_(P_=_0.1262),_Gain_of_disorder_(P_=_0.1729)	0.67259	0.75868
rs1488213352	14:94378480-94378480	G	missense_variant	ENST00000448921.5:c.1226T>C	ENSP00000416066.1:p.Met409Thr	1799	1226	409	M/T	aTg/aCg	7.953e-06	0	0	0	0	0	8.79e-06	0.000163	0	pathogenic	-	deleterious(0.01)	possibly_damaging(0.652)	23.3	deleterious(0.635)	D	0.70586	0.164161	D	0.38096	0.22509	0.65821	1.89479	-0.15616	0.85003	0.3572	0.74766	0.03628	N	D	0.70409	0.29277	D	0.90758	T	0.78238	Gain_of_catalytic_residue_at_P406_(P_=_0.0055),_Gain_of_sheet_(P_=_0.0827),_Gain_of_ubiquitination_at_K404_(P_=_0.0882),_Loss_of_MoRF_binding_(P_=_0.1006),_Gain_of_phosphorylation_at_M409_(P_=_0.108)	0.85755	0.53315
rs149800596	14:94378481-94378481	C	missense_variant	ENST00000448921.5:c.1225A>G	ENSP00000416066.1:p.Met409Val	1798	1225	409	M/V	Atg/Gtg	6.76e-05	0	0.0004338	0	0	0	8.79e-06	0	3.266e-05	-	-	tolerated(1)	benign(0.01)	0.001	neutral(0.001)	T	0.01917	-0.412362	T	0.00443	0.00047	0.45439	0.000871185	-2.52953	0.8397	0.00725	0.74766	0.03628	N	D	0.57318	0.04968	T	0.61693	T	0.5805	-	-	0.04822
rs1011476837	14:94378486-94378486	C	missense_variant	ENST00000448921.5:c.1220T>G	ENSP00000416066.1:p.Leu407Arg	1793	1220	407	L/R	cTc/cGc	-	-	-	-	-	-	-	-	-	-	-	deleterious(0)	probably_damaging(1)	25.5	deleterious(0.945)	D	0.93764	0.48193	D	0.86479	0.82549	0.91922	5.94507	0.576825	0.91533	0.5183	0.74766	0.37183	N	D	0.81539	0.37656	D	0.97524	D	0.98294	Gain_of_MoRF_binding_(P_=_2e-04),_Gain_of_catalytic_residue_at_L407_(P_=_0.0067),_Gain_of_disorder_(P_=_0.0174),_Loss_of_ubiquitination_at_K404_(P_=_0.044),_Loss_of_stability_(P_=_0.0465)	0.91214	0.99505
rs753705146	14:94378490-94378490	T	missense_variant	ENST00000448921.5:c.1216C>A	ENSP00000416066.1:p.Pro406Thr	1789	1216	406	P/T	Ccc/Acc	3.976e-06	0	0	0	0	0	8.79e-06	0	0	-	-	tolerated(0.31)	benign(0.132)	9.782	neutral(0.038)	T	0.42324	-0.0637118	T	0.27504	0.01715	0.66472	0.154071	-1.39466	0.84557	0.02176	0.74766	0.04182	N	D	0.76853	0.11761	T	0.78895	T	0.63485	Gain_of_catalytic_residue_at_Q401_(P_=_9e-04),_Loss_of_disorder_(P_=_0.0725),_Gain_of_MoRF_binding_(P_=_0.0807),_Gain_of_sheet_(P_=_0.0827),_Loss_of_ubiquitination_at_K404_(P_=_0.1191)	0.64135	0.2324
rs1008480744	14:94378492-94378492	T	missense_variant	ENST00000448921.5:c.1214C>A	ENSP00000416066.1:p.Ser405Tyr	1787	1214	405	S/Y	tCt/tAt	-	-	-	-	-	-	-	-	-	-	-	tolerated(0.78)	possibly_damaging(0.879)	1.631	neutral(0.344)	T	0.5672	0.0375211	T	0.30483	0.25952	0.81006	0.208665	-1.3005	0.85393	0.00725	0.74766	0.08895	N	D	0.72067	0.33463	D	0.91337	D	0.85093	Gain_of_catalytic_residue_at_Q401_(P_=_0),_Loss_of_disorder_(P_=_0.0073),_Gain_of_sheet_(P_=_0.0827),_Loss_of_ubiquitination_at_K404_(P_=_0.1037),_Loss_of_MoRF_binding_(P_=_0.2564)	0.85755	0.98003
rs754885222	14:94378495-94378495	C	missense_variant	ENST00000448921.5:c.1211A>G	ENSP00000416066.1:p.Lys404Arg	1784	1211	404	K/R	aAg/aGg	3.976e-06	0	0	0	0	0	8.79e-06	0	0	-	-	tolerated(0.36)	benign(0.009)	9.434	neutral(0.021)	T	0.33632	-0.116896	T	0.01553	0.11452	0.49845	0.321621	-1.1557	0.8775	0.17184	0.42728	0.08115	N	D	0.67545	0.04329	D	0.82004	T	0.65585	Gain_of_catalytic_residue_at_Q401_(P_=_0.0028),_Loss_of_methylation_at_K404_(P_=_0.0041),_Loss_of_ubiquitination_at_K404_(P_=_0.0199),_Loss_of_disorder_(P_=_0.0648),_Gain_of_sheet_(P_=_0.0827)	0.46351	0.458
rs754885222	14:94378495-94378495	G	missense_variant	ENST00000448921.5:c.1211A>C	ENSP00000416066.1:p.Lys404Thr	1784	1211	404	K/T	aAg/aCg	3.976e-06	0	0	0	0	0	8.79e-06	0	0	-	-	tolerated(0.07)	benign(0.261)	12.85	neutral(0.346)	T	0.52443	0.00574233	T	0.23156	0.2528	0.63043	0.522938	-0.973222	0.8791	0.17184	0.42728	0.08115	N	D	0.75824	0.15165	D	0.87348	T	0.78087	Gain_of_catalytic_residue_at_Q401_(P_=_0),_Loss_of_methylation_at_K404_(P_=_0.0025),_Loss_of_ubiquitination_at_K404_(P_=_0.0199),_Loss_of_disorder_(P_=_0.069),_Gain_of_sheet_(P_=_0.0827)	0.55007	0.87914
rs778747339	14:94378498-94378498	A	missense_variant	ENST00000448921.5:c.1208C>T	ENSP00000416066.1:p.Thr403Ile	1781	1208	403	T/I	aCc/aTc	-	-	-	-	-	-	-	-	-	likely_benign	-	tolerated(0.07)	probably_damaging(0.929)	21.4	deleterious(0.695)	T	0.55774	0.0303693	D	0.42174	0.67916	0.85544	2.20034	-0.0485511	0.87433	0.29435	0.74766	0.3335	N	D	0.85632	0.27822	D	0.91894	D	0.84476	Gain_of_catalytic_residue_at_Q401_(P_=_0.0016),_Loss_of_disorder_(P_=_0.0503),_Loss_of_ubiquitination_at_K404_(P_=_0.0727),_Loss_of_phosphorylation_at_T403_(P_=_0.1283),_Loss_of_sheet_(P_=_0.1501)	0.82359	0.77224
rs778747339	14:94378498-94378498	C	missense_variant	ENST00000448921.5:c.1208C>G	ENSP00000416066.1:p.Thr403Ser	1781	1208	403	T/S	aCc/aGc	1.988e-05	0	0	0	0	0	0	0	0.0001633	-	-	deleterious(0.04)	possibly_damaging(0.457)	22.3	deleterious(0.499)	T	0.16606	-0.230316	T	0.23234	0.191	0.77018	1.44544	-0.360131	0.86146	0.29435	0.74766	0.3335	N	D	0.80883	0.04896	D	0.8727	T	0.80569	Gain_of_catalytic_residue_at_Q401_(P_=_0.0018),_Gain_of_disorder_(P_=_0.0324),_Gain_of_ubiquitination_at_K404_(P_=_0.102),_Loss_of_stability_(P_=_0.2311),_Gain_of_relative_solvent_accessibility_(P_=_0.2363)	0.7499	0.63543
rs1267334269	14:94378499-94378499	C	missense_variant	ENST00000448921.5:c.1207A>G	ENSP00000416066.1:p.Thr403Ala	1780	1207	403	T/A	Acc/Gcc	-	-	-	-	-	-	-	-	-	-	-	deleterious(0.05)	possibly_damaging(0.457)	22.6	deleterious(0.495)	T	0.51394	-0.00187934	T	0.30721	0.15963	0.81311	1.27297	-0.456974	0.86815	0.1488	0.42595	0.3335	N	D	0.73402	0.13767	D	0.85035	T	0.76652	Gain_of_catalytic_residue_at_Q401_(P_=_0),_Loss_of_stability_(P_=_0.0976),_Loss_of_disorder_(P_=_0.1155),_Loss_of_ubiquitination_at_K404_(P_=_0.1191),_Loss_of_phosphorylation_at_T403_(P_=_0.1283)	0.75566	0.8338
rs1566747504	14:94378501-94378502	TTT	frameshift_variant	ENST00000448921.5:c.1205del	ENSP00000416066.1:p.Asn402IlefsTer12	1775-1778	1202-1205	401-402	QN/QX	cAAAAt/cAAAt	-	-	-	-	-	-	-	-	-	-	-	-	-	14.17	-	-	-	-	-	-	-	-	-	-	-	-	-	-	-	-	-	-	-	-	-	-	-	-	-
rs879474933	14:94378504-94378505	-	frameshift_variant	ENST00000448921.5:c.1201del	ENSP00000416066.1:p.Gln401LysfsTer13	1774	1201	401	Q/X	Caa/aa	-	-	-	-	-	-	-	-	-	-	-	-	-	-	-	-	-	-	-	-	-	-	-	-	-	-	-	-	-	-	-	-	-	-	-	-	-	-	-
rs17850837	14:94378505-94378505	T	missense_variant	ENST00000448921.5:c.1201C>A	ENSP00000416066.1:p.Gln401Lys	1774	1201	401	Q/K	Caa/Aaa	-	-	-	-	-	-	-	-	-	-	-	tolerated(0.76)	benign(0.001)	0.026	neutral(0.001)	T	0.17656	-0.222478	T	0.04326	0.0212	0.43797	0.00811242	-2.1023	0.83327	0.00635	0.74766	0.0193	N	T	0.35361	0.05734	T	0.47074	T	0.5476	-	-	0.01662
rs1303	14:94378506-94378506	G	missense_variant	ENST00000448921.5:c.1200A>C	ENSP00000416066.1:p.Glu400Asp	1773	1200	400	E/D	gaA/gaC	0.2774	0.1096	0.3225	0.2661	0.284	0.2323	0.2565	0.2749	0.4252	other,benign	25741868,24033266,21625484,23226977,21067581,2394452,22426792,25010111,22916037,27198135,22723858,30873161,25287719,27382189,22962559,28546746,29378629	tolerated(1)	benign(0.007)	0.001	neutral(0.000)	T	0.00101	-0.62625	T	0.00307	0.00151	0.45003	0.00586084	-2.16599	0.86349	0.00635	0.74766	0.17478	N	-	-	0.04578	T	0.00011	T	0.45756	-	-	0.0227
rs1566747567	14:94378506-94378506	G	frameshift_variant	ENST00000448921.5:c.1199_1200insC	ENSP00000416066.1:p.Glu400AspfsTer44	1772-1773	1199-1200	400	E/DX	gaa/gaCa	-	-	-	-	-	-	-	-	-	-	-	-	-	23.7	-	-	-	-	-	-	-	-	-	-	-	-	-	-	-	-	-	-	-	-	-	-	-	-	-
rs1555367779	14:94378506-94378507	T	frameshift_variant	ENST00000448921.5:c.1200del	ENSP00000416066.1:p.Glu400AspfsTer14	1772-1773	1199-1200	400	E/X	gAA/gA	-	-	-	-	-	-	-	-	-	-	-	-	-	-	-	-	-	-	-	-	-	-	-	-	-	-	-	-	-	-	-	-	-	-	-	-	-	-	-
rs1348752810	14:94378507-94378507	C	missense_variant	ENST00000448921.5:c.1199A>G	ENSP00000416066.1:p.Glu400Gly	1772	1199	400	E/G	gAa/gGa	3.976e-06	0	0	0	5.437e-05	0	0	0	0	-	-	deleterious(0.03)	possibly_damaging(0.546)	22.7	deleterious(0.550)	T	0.27156	-0.15743	D	0.41179	0.50984	0.81187	1.07676	-0.579805	0.88611	0.18329	0.44867	0.17478	N	D	0.77486	0.24212	D	0.91682	D	0.85748	Gain_of_catalytic_residue_at_Q401_(P_=_0),_Loss_of_ubiquitination_at_K404_(P_=_0.0653),_Loss_of_stability_(P_=_0.0694),_Loss_of_disorder_(P_=_0.1425),_Gain_of_MoRF_binding_(P_=_0.1531)	0.66564	0.55033
rs777537335	14:94378510-94378510	G	missense_variant	ENST00000448921.5:c.1196T>C	ENSP00000416066.1:p.Ile399Thr	1769	1196	399	I/T	aTt/aCt	7.953e-06	0	0	0	0	0	8.79e-06	0.0001629	0	-	-	tolerated(0.21)	benign(0.054)	1.539	neutral(0.048)	T	0.18992	-0.212758	T	0.05502	0.06227	0.61147	0.156123	-1.39066	0.8397	0.04062	0.4811	0.01194	N	D	0.62248	0.13049	T	0.73766	T	0.60524	Gain_of_catalytic_residue_at_Q401_(P_=_9e-04),_Gain_of_disorder_(P_=_0.0087),_Loss_of_stability_(P_=_0.0736),_Gain_of_ubiquitination_at_K404_(P_=_0.078),_Gain_of_relative_solvent_accessibility_(P_=_0.1259)	0.56767	0.13178
rs139972630	14:94378511-94378511	C	missense_variant	ENST00000448921.5:c.1195A>G	ENSP00000416066.1:p.Ile399Val	1768	1195	399	I/V	Att/Gtt	3.976e-06	0	0	0	0	0	8.79e-06	0	0	-	-	tolerated(0.4)	benign(0)	0.07	neutral(0.016)	T	0.14663	-0.24543	T	0.03174	0.01177	0.45631	0.00534068	-2.184	0.83495	0.00557	0.74766	0.01194	N	T	0.47973	0.04231	T	0.59058	T	0.55747	-	-	0.03917
rs1260078376	14:94378516-94378516	G	missense_variant	ENST00000448921.5:c.1190T>C	ENSP00000416066.1:p.Leu397Ser	1763	1190	397	L/S	tTa/tCa	-	-	-	-	-	-	-	-	-	-	-	deleterious(0)	possibly_damaging(0.582)	23	deleterious(0.645)	T	0.58694	0.0527408	D	0.42213	0.52446	0.83148	1.16444	-0.523405	0.85799	0.26736	0.50053	0.02701	N	D	0.74213	0.2809	D	0.87835	T	0.69609	Gain_of_catalytic_residue_at_Q401_(P_=_0.0036),_Gain_of_disorder_(P_=_0.0068),_Loss_of_stability_(P_=_0.0427),_Gain_of_ubiquitination_at_K392_(P_=_0.1725),_Gain_of_MoRF_binding_(P_=_0.3138)	0.78954	0.51832
rs1368052264	14:94378523-94378523	A	missense_variant	ENST00000448921.5:c.1183G>T	ENSP00000416066.1:p.Val395Phe	1756	1183	395	V/F	Gtc/Ttc	3.977e-06	0	0	0	0	0	0	0	3.266e-05	-	-	tolerated(0.17)	benign(0.048)	0.05	neutral(0.062)	T	0.21357	-0.196168	T	0.10008	0.17327	0.64292	0.00773894	-2.11163	0.84341	0.0066	0.74766	0.0624	N	D	0.6536	0.06029	T	0.6413	T	0.57841	Gain_of_catalytic_residue_at_N391_(P_=_0.0155),_Gain_of_ubiquitination_at_K392_(P_=_0.0745),_Gain_of_disorder_(P_=_0.2287),_Loss_of_sheet_(P_=_0.302),_Loss_of_stability_(P_=_0.3461)	0.80392	0.10031
rs199422209	14:94378528-94378528	A	missense_variant	ENST00000448921.5:c.1178C>T	ENSP00000416066.1:p.Pro393Leu	1751	1178	393	P/L	cCc/cTc	4.772e-05	0	0	0	0	0	0.0001055	0	0	pathogenic,other,likely_pathogenic	14985567,27296815,10234508,26321041,1552539,2784123,3038256,18024524,25391508	deleterious(0)	probably_damaging(1)	25.2	deleterious(0.945)	D	0.89305	0.389654	D	0.98068	0.84931	0.94202	5.0346	0.486075	0.98229	0.5377	0.74766	0.23959	N	D	0.80699	0.33584	D	0.99404	D	0.97834	-	-	0.99575
rs199422209	14:94378528-94378528	C	missense_variant	ENST00000448921.5:c.1178C>G	ENSP00000416066.1:p.Pro393Arg	1751	1178	393	P/R	cCc/cGc	1.193e-05	0	0	0	0	0	2.637e-05	0	0	-	14985567,27296815,10234508,26321041,1552539,2784123,3038256,18024524,25391508	deleterious(0)	probably_damaging(0.998)	24.9	deleterious(0.919)	D	0.9427	0.499275	D	0.98254	0.80798	0.94177	4.83286	0.462285	0.98229	0.5377	0.74766	0.23959	N	D	0.75114	0.33983	D	0.99319	D	0.98278	Gain_of_MoRF_binding_(P_=_0.0176),_Loss_of_ubiquitination_at_K392_(P_=_0.1022),_Loss_of_disorder_(P_=_0.1793),_Gain_of_catalytic_residue_at_F396_(P_=_0.27),_Loss_of_sheet_(P_=_0.302)	0.95773	0.98683
rs199422209	14:94378528-94378528	T	missense_variant	ENST00000448921.5:c.1178C>A	ENSP00000416066.1:p.Pro393His	1751	1178	393	P/H	cCc/cAc	3.181e-05	0	0	0	0	0	0	0	0.0002613	-	14985567,27296815,10234508,26321041,1552539,2784123,3038256,18024524,25391508	deleterious(0)	probably_damaging(1)	24.9	deleterious(0.945)	D	0.85993	0.342389	D	0.92979	0.59622	0.94202	5.0346	0.486075	0.98245	0.5377	0.74766	0.23959	N	D	0.74603	0.34925	D	0.99404	D	0.97834	Gain_of_catalytic_residue_at_F394_(P_=_0.0205),_Loss_of_sheet_(P_=_0.0817),_Gain_of_ubiquitination_at_K392_(P_=_0.1725),_Loss_of_stability_(P_=_0.1732),_Loss_of_disorder_(P_=_0.2013)	0.96158	0.99575
rs61761869	14:94378529-94378529	A	missense_variant	ENST00000448921.5:c.1177C>T	ENSP00000416066.1:p.Pro393Ser	1750	1177	393	P/S	Ccc/Tcc	0.0002903	6.152e-05	0.0001735	0	0	4.619e-05	0.0005362	0.0004888	3.266e-05	pathogenic,conflicting_interpretations_of_pathogenicity	10234508,31251477	deleterious(0)	probably_damaging(0.985)	25.6	deleterious(0.877)	D	0.83358	0.30492	D	0.66863	0.85254	0.91543	4.44117	0.411548	0.98183	0.5377	0.74766	0.23959	N	D	0.64147	0.33072	D	0.98873	D	0.9946	-	-	0.9207
rs61761869	14:94378529-94378529	T	missense_variant	ENST00000448921.5:c.1177C>A	ENSP00000416066.1:p.Pro393Thr	1750	1177	393	P/T	Ccc/Acc	-	-	-	-	-	-	-	-	-	pathogenic,uncertain_significance	10234508,31251477	deleterious(0)	probably_damaging(0.993)	25.3	deleterious(0.895)	D	0.96012	0.555444	D	0.92539	0.58759	0.94024	4.97612	0.479333	0.98229	0.5377	0.74766	0.23959	N	D	0.65912	0.34483	D	0.99181	D	0.98887	Gain_of_catalytic_residue_at_F396_(P_=_0.017),_Loss_of_disorder_(P_=_0.1857),_Loss_of_stability_(P_=_0.2156),_Loss_of_ubiquitination_at_K392_(P_=_0.2258),_Loss_of_sheet_(P_=_0.302)	0.95604	0.95841
rs1296584606	14:94378540-94378540	C	missense_variant	ENST00000448921.5:c.1166A>G	ENSP00000416066.1:p.Lys389Arg	1739	1166	389	K/R	aAg/aGg	3.976e-06	0	0	0	0	0	8.79e-06	0	0	-	-	tolerated(0.35)	benign(0.02)	8.704	neutral(0.022)	T	0.24428	-0.175375	T	0.10088	0.04236	0.50523	0.0297875	-1.82937	0.84415	0.01591	0.74766	0.0074	N	D	0.56964	0.04217	T	0.65119	T	0.60543	Gain_of_catalytic_residue_at_P385_(P_=_2e-04),_Loss_of_methylation_at_K389_(P_=_0.0021),_Loss_of_ubiquitination_at_K389_(P_=_0.1306),_Loss_of_disorder_(P_=_0.1382),_Gain_of_sheet_(P_=_0.1451)	0.39306	0.1584
rs1321171362	14:94378544-94378544	G	missense_variant	ENST00000448921.5:c.1162G>C	ENSP00000416066.1:p.Val388Leu	1735	1162	388	V/L	Gtc/Ctc	3.976e-06	0	0	0	0	0	8.79e-06	0	0	-	-	tolerated(0.17)	benign(0.024)	1.718	neutral(0.060)	T	0.27427	-0.155682	T	0.14461	0.02327	0.55237	0.0159922	-1.96515	0.84628	0.00473	0.74766	0.05638	N	D	0.64849	0.05259	T	0.68406	T	0.53461	Gain_of_catalytic_residue_at_P385_(P_=_2e-04),_Gain_of_sheet_(P_=_0.1451),_Gain_of_glycosylation_at_P386_(P_=_0.1656),_Gain_of_ubiquitination_at_K392_(P_=_0.1725),_Gain_of_phosphorylation_at_S383_(P_=_0.2029)	0.51107	0.45235
rs1364408556	14:94378544-94378544	TGT	inframe_insertion	ENST00000448921.5:c.1161_1162insACA	ENSP00000416066.1:p.Glu387_Val388insThr	1734-1735	1161-1162	387-388	-/T	-/ACA	-	-	-	-	-	-	-	-	-	-	-	-	-	-	-	-	-	-	-	-	-	-	-	-	-	-	-	-	-	-	-	-	-	-	-	-	-	-	-
rs1405095441	14:94378546-94378553	-	frameshift_variant	ENST00000448921.5:c.1153_1159del	ENSP00000416066.1:p.Pro385ArgfsTer11	1726-1732	1153-1159	385-387	PPE/X	CCCCCCGag/ag	-	-	-	-	-	-	-	-	-	-	-	-	-	-	-	-	-	-	-	-	-	-	-	-	-	-	-	-	-	-	-	-	-	-	-	-	-	-	-
rs121912712	14:94378547-94378547	T	missense_variant	ENST00000448921.5:c.1159G>A	ENSP00000416066.1:p.Glu387Lys	1732	1159	387	E/K	Gag/Aag	0.000386	6.155e-05	0	0	0.001414	0.002634	4.4e-05	0.0001629	0.0002287	other,conflicting_interpretations_of_pathogenicity,uncertain_significance	2696185,14985567,3527273	tolerated(0.74)	benign(0.026)	0.021	neutral(0.003)	T	0.01453	-0.431438	T	0.00956	0.01583	0.53285	0.0217969	-1.89897	0.84415	0.00473	0.74766	0.00162	N	D	0.61427	0.08431	T	0.7361	T	0.61724	-	-	0.32734
rs764325655	14:94378548-94378549	GGGGGG	frameshift_variant	ENST00000448921.5:c.1158del	ENSP00000416066.1:p.Glu387ArgfsTer11	1725-1731	1152-1158	384-386	IPP/IPX	atCCCCCCC/atCCCCCC	3.979e-06	0	0	0	0	0	8.799e-06	0	0	likely_pathogenic,pathogenic	22016686,7977369,11334395	-	-	14.29	-	-	-	-	-	-	-	-	-	-	-	-	-	-	-	-	-	-	-	-	-	-	-	-	-
rs764325655	14:94378548-94378549	GGGGGGGG	frameshift_variant	ENST00000448921.5:c.1158_1159insC	ENSP00000416066.1:p.Glu387ArgfsTer14	1725-1731	1152-1158	384-386	IPP/IPPX	atCCCCCCC/atCCCCCCCC	2.388e-05	0	0	0	0	0	5.279e-05	0	0	likely_pathogenic,pathogenic	22016686,7977369,11334395	-	-	18.62	-	-	-	-	-	-	-	-	-	-	-	-	-	-	-	-	-	-	-	-	-	-	-	-	-
rs569384943	14:94378549-94378549	A	missense_variant	ENST00000448921.5:c.1157C>T	ENSP00000416066.1:p.Pro386Leu	1730	1157	386	P/L	cCc/cTc	-	-	-	-	-	-	-	-	-	-	-	tolerated(0.15)	benign(0.03)	13.95	neutral(0.242)	T	0.39799	-0.0794807	T	0.14948	0.03211	0.77097	0.279334	-1.20441	0.8366	0.0707	0.43971	0.33053	N	D	0.65766	0.06768	T	0.73175	T	0.60036	Gain_of_catalytic_residue_at_I384_(P_=_0.0065),_Loss_of_disorder_(P_=_0.0411),_Gain_of_sheet_(P_=_0.0477),_Loss_of_glycosylation_at_S383_(P_=_0.0771),_Loss_of_phosphorylation_at_S383_(P_=_0.1274)	0.48322	0.59869
rs569384943	14:94378549-94378549	T	missense_variant	ENST00000448921.5:c.1157C>A	ENSP00000416066.1:p.Pro386His	1730	1157	386	P/H	cCc/cAc	-	-	-	-	-	-	-	-	-	-	-	deleterious(0.04)	benign(0.275)	17.42	neutral(0.378)	T	0.45235	-0.0447864	D	0.47031	0.25773	0.81027	0.487877	-1.00082	0.84487	0.0707	0.43971	0.33053	N	D	0.75807	0.1089	D	0.82468	T	0.75368	Gain_of_catalytic_residue_at_I384_(P_=_6e-04),_Loss_of_disorder_(P_=_0.1287),_Loss_of_phosphorylation_at_S383_(P_=_0.1295),_Gain_of_sheet_(P_=_0.1451),_Loss_of_glycosylation_at_S383_(P_=_0.1539)	0.36372	0.82106
rs12233	14:94378550-94378550	A	missense_variant	ENST00000448921.5:c.1156C>T	ENSP00000416066.1:p.Pro386Ser	1729	1156	386	P/S	Ccc/Tcc	4.772e-05	6.152e-05	5.784e-05	0	5.437e-05	0	4.395e-05	0	9.799e-05	uncertain_significance	-	tolerated(0.05)	benign(0.051)	14.03	neutral(0.348)	T	0.27505	-0.155168	T	0.1549	0.17455	0.77956	0.868581	-0.721715	0.84195	0.32523	0.74766	0.33053	N	D	0.61552	0.06974	D	0.82249	T	0.73293	Gain_of_catalytic_residue_at_I384_(P_=_0.0103),_Loss_of_sheet_(P_=_0.1158),_Loss_of_glycosylation_at_S383_(P_=_0.1231),_Gain_of_phosphorylation_at_P386_(P_=_0.1248),_Gain_of_disorder_(P_=_0.2252)	0.39794	0.77964
rs12233	14:94378550-94378550	C	missense_variant	ENST00000448921.5:c.1156C>G	ENSP00000416066.1:p.Pro386Ala	1729	1156	386	P/A	Ccc/Gcc	0.000175	0.0002461	0.0008965	0	0	0	6.154e-05	0.0001629	3.266e-05	-	-	deleterious(0.04)	benign(0.131)	16.12	neutral(0.360)	T	0.07532	-0.312481	T	0.04988	0.15485	0.77234	0.92825	-0.680225	0.84047	0.32523	0.74766	0.33053	N	D	0.64074	0.08315	D	0.81507	T	0.72885	-	-	0.75298
rs12233	14:94378550-94378550	T	missense_variant	ENST00000448921.5:c.1156C>A	ENSP00000416066.1:p.Pro386Thr	1729	1156	386	P/T	Ccc/Acc	4.374e-05	6.152e-05	8.676e-05	0	0.0001087	0	8.791e-06	0	0.0001307	-	-	tolerated(0.06)	benign(0.051)	13.38	neutral(0.326)	T	0.21628	-0.1943	T	0.07599	0.14536	0.77249	0.813423	-0.760533	0.84047	0.32523	0.74766	0.33053	N	D	0.66415	0.06588	D	0.81222	T	0.70335	-	-	0.53793
rs867521254	14:94378553-94378553	A	missense_variant	ENST00000448921.5:c.1153C>T	ENSP00000416066.1:p.Pro385Ser	1726	1153	385	P/S	Ccc/Tcc	-	-	-	-	-	-	-	-	-	-	-	deleterious(0.05)	possibly_damaging(0.667)	23	deleterious(0.581)	T	0.50905	-0.00541797	D	0.52242	0.54556	0.78326	1.56049	-0.301741	0.89757	0.2513	0.44174	0.13494	N	D	0.79642	0.26467	D	0.89878	T	0.80724	Gain_of_catalytic_residue_at_P386_(P_=_0.0057),_Gain_of_phosphorylation_at_P385_(P_=_0.0654),_Loss_of_glycosylation_at_S383_(P_=_0.1126),_Loss_of_sheet_(P_=_0.1158),_Gain_of_loop_(P_=_0.2045)	0.65434	0.64354
rs1390428818	14:94378556-94378556	TACTTA	frameshift_variant	ENST00000448921.5:c.1150_1151insAGTA	ENSP00000416066.1:p.Ile384LysfsTer18	1722-1723	1149-1150	383-384	SI/SKYX	tcTAtc/tcTAAGTAtc	-	-	-	-	-	-	-	-	-	-	-	-	-	-	-	-	-	-	-	-	-	-	-	-	-	-	-	-	-	-	-	-	-	-	-	-	-	-	-
rs762151808	14:94378559-94378559	C	missense_variant	ENST00000448921.5:c.1147T>G	ENSP00000416066.1:p.Ser383Ala	1720	1147	383	S/A	Tct/Gct	3.977e-06	0	0	0	0	4.619e-05	0	0	0	-	-	tolerated(0.07)	benign(0.075)	11.38	neutral(0.324)	T	0.44106	-0.0522465	D	0.68624	0.17364	0.63047	0.25212	-1.23883	0.89145	0.03696	0.48965	0.08583	N	D	0.71402	0.04348	D	0.83122	T	0.68356	Gain_of_catalytic_residue_at_P385_(P_=_2e-04),_Loss_of_phosphorylation_at_S383_(P_=_0.0477),_Loss_of_glycosylation_at_S383_(P_=_0.05),_Loss_of_sheet_(P_=_0.1158),_Loss_of_disorder_(P_=_0.1312)	0.56448	0.53506
rs1307482110	14:94378560-94378560	CC	frameshift_variant	ENST00000448921.5:c.1146dup	ENSP00000416066.1:p.Ser383ValfsTer18	1719	1146	382	M/MX	atG/atGG	-	-	-	-	-	-	-	-	-	-	-	-	-	-	-	-	-	-	-	-	-	-	-	-	-	-	-	-	-	-	-	-	-	-	-	-	-	-	-
rs372140596	14:94378560-94378560	T	missense_variant	ENST00000448921.5:c.1146G>A	ENSP00000416066.1:p.Met382Ile	1719	1146	382	M/I	atG/atA	3.977e-06	6.152e-05	0	0	0	0	0	0	0	-	-	tolerated(0.24)	benign(0.055)	10.87	neutral(0.041)	T	0.2732	-0.156371	T	0.11784	0.07027	0.61323	0.34749	-1.12823	0.87352	0.11261	0.42728	0.01603	N	D	0.65097	0.05194	D	0.82317	T	0.56115	-	-	0.50365
rs121912713	14:94378561-94378561	C	missense_variant	ENST00000448921.5:c.1145T>G	ENSP00000416066.1:p.Met382Arg	1718	1145	382	M/R	aTg/aGg	-	-	-	-	-	-	-	-	-	pathogenic	14985567,412531,1569192,3484755,3484756,6604220,7706910,8182727	tolerated(0.25)	benign(0.034)	10.78	neutral(0.039)	D	0.66551	0.121774	T	0.13055	0.02361	0.63544	0.0220994	-1.89592	0.86549	0.00484	0.74766	0.01603	N	D	0.55115	0.06728	T	0.7275	T	0.59746	Gain_of_catalytic_residue_at_P385_(P_=_2e-04),_Loss_of_sheet_(P_=_0.0817),_Gain_of_phosphorylation_at_S383_(P_=_0.1091),_Gain_of_solvent_accessibility_(P_=_0.1133),_Gain_of_glycosylation_at_S383_(P_=_0.1475)	0.85223	0.26816
rs1355524763	14:94378561-94378568	-	frameshift_variant	ENST00000448921.5:c.1138_1144del	ENSP00000416066.1:p.Ile380CysfsTer16	1711-1717	1138-1144	380-382	IPM/X	ATACCCAtg/tg	-	-	-	-	-	-	-	-	-	-	-	-	-	-	-	-	-	-	-	-	-	-	-	-	-	-	-	-	-	-	-	-	-	-	-	-	-	-	-
rs917855405	14:94378562-94378562	A	missense_variant	ENST00000448921.5:c.1144A>T	ENSP00000416066.1:p.Met382Leu	1717	1144	382	M/L	Atg/Ttg	-	-	-	-	-	-	-	-	-	-	-	tolerated(0.39)	benign(0.007)	6.692	neutral(0.016)	T	0.39705	-0.0800669	T	0.198	0.02877	0.55538	0.110012	-1.49392	0.86815	0.02665	0.51787	0.01603	N	D	0.67822	0.04582	T	0.77232	T	0.61312	Gain_of_catalytic_residue_at_P385_(P_=_2e-04),_Loss_of_sheet_(P_=_0.0817),_Loss_of_disorder_(P_=_0.1567),_Loss_of_phosphorylation_at_S383_(P_=_0.2018),_Loss_of_glycosylation_at_S383_(P_=_0.2102)	0.55489	0.20963
rs917855405	14:94378562-94378562	C	missense_variant	ENST00000448921.5:c.1144A>G	ENSP00000416066.1:p.Met382Val	1717	1144	382	M/V	Atg/Gtg	-	-	-	-	-	-	-	-	-	-	-	tolerated(0.16)	benign(0.096)	6.484	neutral(0.067)	T	0.42532	-0.062396	T	0.23837	0.02143	0.61934	0.187433	-1.3344	0.87272	0.02665	0.51787	0.01603	N	D	0.75678	0.04904	D	0.84836	T	0.65879	Gain_of_catalytic_residue_at_P385_(P_=_0),_Gain_of_sheet_(P_=_0.1208),_Gain_of_glycosylation_at_S383_(P_=_0.1304),_Loss_of_disorder_(P_=_0.1697),_Loss_of_phosphorylation_at_S383_(P_=_0.2046)	0.58664	0.49225
rs1486743686	14:94378568-94378568	C	missense_variant	ENST00000448921.5:c.1138A>G	ENSP00000416066.1:p.Ile380Val	1711	1138	380	I/V	Ata/Gta	7.954e-06	0	2.892e-05	0	5.438e-05	0	0	0	0	-	-	tolerated(0.59)	benign(0)	5.618	neutral(0.004)	T	0.07356	-0.314517	T	0.02279	0.0074	0.44076	0.166532	-1.37098	0.83815	0.12456	0.42595	0.00765	N	D	0.58216	0.04241	T	0.65586	T	0.54683	Gain_of_catalytic_residue_at_P385_(P_=_8e-04),_Loss_of_sheet_(P_=_0.0817),_Gain_of_glycosylation_at_S383_(P_=_0.1857),_Gain_of_phosphorylation_at_S383_(P_=_0.2133),_Gain_of_disorder_(P_=_0.2389)	0.29729	0.13178
rs1291036417	14:94378570-94378570	A	missense_variant	ENST00000448921.5:c.1136C>T	ENSP00000416066.1:p.Ala379Val	1709	1136	379	A/V	gCc/gTc	-	-	-	-	-	-	-	-	-	-	-	tolerated(0.31)	benign(0.005)	6.374	neutral(0.027)	T	0.37229	-0.0951418	T	0.01592	0.04432	0.44473	0.0747455	-1.60141	0.86888	0.01613	0.74766	0.05596	U	D	0.65502	0.04833	T	0.70051	T	0.56481	Gain_of_catalytic_residue_at_E378_(P_=_0.0098),_Gain_of_sheet_(P_=_0.1208),_Loss_of_helix_(P_=_0.1706),_Loss_of_glycosylation_at_S383_(P_=_0.2151),_Loss_of_phosphorylation_at_S383_(P_=_0.2431)	0.37186	0.25186
rs1291036417	14:94378570-94378570	T	missense_variant	ENST00000448921.5:c.1136C>A	ENSP00000416066.1:p.Ala379Asp	1709	1136	379	A/D	gCc/gAc	-	-	-	-	-	-	-	-	-	likely_benign	-	tolerated(0.64)	benign(0.007)	3.276	neutral(0.003)	T	0.42063	-0.065384	T	0.07655	0.02885	0.61909	0.137201	-1.42956	0.87989	0.01613	0.74766	0.05596	N	D	0.67916	0.06746	T	0.80801	T	0.61006	Gain_of_catalytic_residue_at_A374_(P_=_0.009),_Loss_of_sheet_(P_=_0.0817),_Gain_of_relative_solvent_accessibility_(P_=_0.09),_Gain_of_glycosylation_at_S383_(P_=_0.1228),_Gain_of_solvent_accessibility_(P_=_0.1376)	0.47501	0.73286
rs773275051	14:94378571-94378571	T	missense_variant	ENST00000448921.5:c.1135G>A	ENSP00000416066.1:p.Ala379Thr	1708	1135	379	A/T	Gcc/Acc	7.954e-06	0	0	0	0	0	1.758e-05	0	0	-	-	tolerated(0.57)	benign(0.012)	6.715	neutral(0.007)	T	0.32652	-0.122894	T	0.01261	0.10567	0.52221	0.40978	-1.06767	0.87591	0.12165	0.42595	0.05596	U	D	0.63296	0.0502	T	0.78609	T	0.56792	-	-	0.40313
rs1240316149	14:94378571-94378572	C	frameshift_variant	ENST00000448921.5:c.1135del	ENSP00000416066.1:p.Ala379ProfsTer19	1707-1708	1134-1135	378-379	EA/EX	gaGGcc/gaGcc	-	-	-	-	-	-	-	-	-	-	-	-	-	22.4	-	-	-	-	-	-	-	-	-	-	-	-	-	-	-	-	-	-	-	-	-	-	-	-	-
rs1389973852	14:94378573-94378573	TT	frameshift_variant	ENST00000448921.5:c.1133dup	ENSP00000416066.1:p.Ala379GlyfsTer22	1706	1133	378	E/EX	gAg/gAAg	-	-	-	-	-	-	-	-	-	-	-	-	-	-	-	-	-	-	-	-	-	-	-	-	-	-	-	-	-	-	-	-	-	-	-	-	-	-	-
rs1566747984	14:94378574-94378574	T	missense_variant	ENST00000448921.5:c.1132G>A	ENSP00000416066.1:p.Glu378Lys	1705	1132	378	E/K	Gag/Aag	-	-	-	-	-	-	-	-	-	likely_benign	-	deleterious(0.01)	benign(0.243)	22	neutral(0.430)	T	0.5442	0.0202867	T	0.28506	0.32142	0.62831	0.891698	-0.705568	0.87671	0.24139	0.48965	0.08313	U	D	0.71894	0.11657	D	0.83677	T	0.70417	Gain_of_catalytic_residue_at_A374_(P_=_0.0062),_Gain_of_ubiquitination_at_E378_(P_=_0.0155),_Loss_of_sheet_(P_=_0.0817),_Gain_of_glycosylation_at_E378_(P_=_0.1129),_Loss_of_phosphorylation_at_S383_(P_=_0.1953)	0.53715	0.39105
rs28929473	14:94378575-94378575	A	missense_variant	ENST00000448921.5:c.1131A>T	ENSP00000416066.1:p.Leu377Phe	1704	1131	377	L/F	ttA/ttT	-	-	-	-	-	-	-	-	-	other	2539391,3257661,25425243,28486562	tolerated(0.28)	benign(0.006)	0.018	neutral(0.032)	T	0.26468	-0.161897	T	0.04584	0.02462	0.5756	0.105956	-1.50463	0.8791	0.0707	0.44398	0.01443	N	D	0.59213	0.05106	T	0.7946	T	0.5856	Gain_of_catalytic_residue_at_A372_(P_=_5e-04),_Gain_of_sheet_(P_=_0.1208),_Loss_of_helix_(P_=_0.1706),_Loss_of_loop_(P_=_0.2897),_Gain_of_disorder_(P_=_0.3211)	0.44874	0.3584
rs1360056375	14:94378575-94378580	-	frameshift_variant	ENST00000448921.5:c.1126_1130del	ENSP00000416066.1:p.Phe376ArgfsTer23	1699-1703	1126-1130	376-377	FL/X	TTTTTa/a	-	-	-	-	-	-	-	-	-	-	-	-	-	-	-	-	-	-	-	-	-	-	-	-	-	-	-	-	-	-	-	-	-	-	-	-	-	-	-
rs763023697	14:94378576-94378577	AAAA	frameshift_variant	ENST00000448921.5:c.1130del	ENSP00000416066.1:p.Leu377Ter	1699-1703	1126-1130	376-377	FL/FX	TTTTTa/TTTTa	3.977e-06	0	0	0	5.439e-05	0	0	0	0	pathogenic	-	-	-	-	-	-	-	-	-	-	-	-	-	-	-	-	-	-	-	-	-	-	-	-	-	-	-	-	-
rs763023697	14:94378576-94378577	AAAAAA	frameshift_variant	ENST00000448921.5:c.1130_1131insT	ENSP00000416066.1:p.Leu377PhefsTer24	1699-1703	1126-1130	376-377	FL/FFX	TTTTTa/TTTTTTa	1.193e-05	0	2.893e-05	0	0	0	1.759e-05	0	0	pathogenic	-	-	-	-	-	-	-	-	-	-	-	-	-	-	-	-	-	-	-	-	-	-	-	-	-	-	-	-	-
rs751696406	14:94378580-94378580	T	missense_variant	ENST00000448921.5:c.1126T>A	ENSP00000416066.1:p.Phe376Ile	1699	1126	376	F/I	Ttt/Att	-	-	-	-	-	-	-	-	-	-	-	tolerated(0.46)	benign(0)	0.001	neutral(0.012)	T	0.21471	-0.195388	T	0.26024	0.09753	0.4478	0.00581396	-2.16756	0.83578	0.00473	0.74766	0.01059	N	D	0.518	0.06156	T	0.66942	T	0.55753	Gain_of_catalytic_residue_at_A372_(P_=_0.0039),_Loss_of_sheet_(P_=_0.1158),_Loss_of_helix_(P_=_0.1706),_Gain_of_disorder_(P_=_0.2306),_Gain_of_loop_(P_=_0.2754)	0.65149	0.09735
rs1223932854	14:94378581-94378581	CTCCAG	protein_altering_variant	ENST00000448921.5:c.1124_1125insCTGGAG	ENSP00000416066.1:p.Met375delinsIleTrpArg	1697-1698	1124-1125	375	M/IWR	atg/atCTGGAGg	-	-	-	-	-	-	-	-	-	-	-	-	-	-	-	-	-	-	-	-	-	-	-	-	-	-	-	-	-	-	-	-	-	-	-	-	-	-	-
rs1421513582	14:94378582-94378582	G	missense_variant	ENST00000448921.5:c.1124T>C	ENSP00000416066.1:p.Met375Thr	1697	1124	375	M/T	aTg/aCg	1.193e-05	0	2.892e-05	0	0	0	8.792e-06	0	3.266e-05	-	-	tolerated(1)	benign(0)	5.202	neutral(0.000)	T	0.17958	-0.220262	T	0.05306	0.0051	0.50262	0.154174	-1.39446	0.83327	0.23848	0.48965	0.10634	N	D	0.52479	0.05315	T	0.30366	T	0.51234	Gain_of_catalytic_residue_at_A372_(P_=_0.0013),_Gain_of_phosphorylation_at_M375_(P_=_0.0526),_Loss_of_stability_(P_=_0.1178),_Gain_of_disorder_(P_=_0.1185),_Gain_of_sheet_(P_=_0.1208)	0.75452	1e-05
rs765199959	14:94378583-94378583	G	missense_variant	ENST00000448921.5:c.1123A>C	ENSP00000416066.1:p.Met375Leu	1696	1123	375	M/L	Atg/Ctg	7.955e-06	0	0	0	0	4.62e-05	8.792e-06	0	0	-	-	deleterious(0)	benign(0)	17.12	neutral(0.445)	T	0.38086	-0.0899337	T	0.09596	0.0503	0.52176	0.70164	-0.840451	0.86722	0.1801	0.44625	0.10634	N	D	0.63278	0.04572	T	0.7693	T	0.64424	Gain_of_catalytic_residue_at_A372_(P_=_0.004),_Gain_of_sheet_(P_=_0.1208),_Loss_of_disorder_(P_=_0.1825),_Gain_of_loop_(P_=_0.2754),_Loss_of_helix_(P_=_0.3949)	0.79885	0.20218
rs1382448623	14:94378584-94378584	GGGGGG	frameshift_variant	ENST00000448921.5:c.1122_1123insCCCC	ENSP00000416066.1:p.Met375ProfsTer27	1694-1695	1121-1122	374	A/APX	gCC/gCCCCCC	-	-	-	-	-	-	-	-	-	-	-	-	-	-	-	-	-	-	-	-	-	-	-	-	-	-	-	-	-	-	-	-	-	-	-	-	-	-	-
rs1566748077	14:94378585-94378585	T	missense_variant	ENST00000448921.5:c.1121C>A	ENSP00000416066.1:p.Ala374Asp	1694	1121	374	A/D	gCc/gAc	-	-	-	-	-	-	-	-	-	likely_benign	-	tolerated(0.1)	benign(0.071)	8.506	neutral(0.291)	T	0.49079	-0.0184092	T	0.18842	0.16155	0.86884	0.702094	-0.840121	0.87194	0.247	0.44398	0.09459	N	D	0.66064	0.06933	D	0.89066	T	0.80627	Gain_of_catalytic_residue_at_A372_(P_=_0.0072),_Gain_of_disorder_(P_=_0.1153),_Gain_of_sheet_(P_=_0.1208),_Loss_of_helix_(P_=_0.1706),_Loss_of_phosphorylation_at_T369_(P_=_0.1843)	0.91139	0.93737
rs752723808	14:94378586-94378586	T	missense_variant	ENST00000448921.5:c.1120G>A	ENSP00000416066.1:p.Ala374Thr	1693	1120	374	A/T	Gcc/Acc	1.193e-05	0.0001231	2.893e-05	0	0	0	0	0	0	uncertain_significance	-	tolerated(0.19)	benign(0.013)	6.371	neutral(0.050)	T	0.09713	-0.28923	T	0.00222	0.20412	0.65533	0.327239	-1.14963	0.86963	0.08233	0.43304	0.09459	N	D	0.6773	0.04735	D	0.82453	T	0.66855	Gain_of_catalytic_residue_at_A372_(P_=_0.0025),_Gain_of_phosphorylation_at_A374_(P_=_0.0698),_Gain_of_sheet_(P_=_0.1208),_Loss_of_helix_(P_=_0.1706),_Gain_of_disorder_(P_=_0.1784)	0.89763	0.58118
rs12077	14:94378589-94378589	A	missense_variant	ENST00000448921.5:c.1117G>T	ENSP00000416066.1:p.Gly373Trp	1690	1117	373	G/W	Ggg/Tgg	-	-	-	-	-	-	-	-	-	-	30633749	tolerated(0.12)	benign(0.416)	20.4	neutral(0.395)	D	0.64249	0.0995955	D	0.64273	0.16967	0.90208	1.94586	-0.136667	0.88298	0.60666	0.74766	0.12149	N	D	0.70541	0.34754	D	0.92499	D	0.86991	Gain_of_catalytic_residue_at_A372_(P_=_0.0028),_Loss_of_disorder_(P_=_0.0309),_Gain_of_helix_(P_=_0.132),_Loss_of_phosphorylation_at_T369_(P_=_0.1347),_Loss_of_loop_(P_=_0.2897)	0.87564	0.79018
rs12077	14:94378589-94378589	T	missense_variant	ENST00000448921.5:c.1117G>A	ENSP00000416066.1:p.Gly373Arg	1690	1117	373	G/R	Ggg/Agg	1.193e-05	0	0	0	0	0.0001386	0	0	0	-	30633749	tolerated(0.13)	benign(0.319)	19.49	neutral(0.352)	D	0.61826	0.078183	T	0.27912	0.34219	0.83503	1.69501	-0.239111	0.8783	0.60666	0.74766	0.12149	N	D	0.65855	0.07091	D	0.88534	T	0.81626	-	-	0.7267
rs751343534	14:94378590-94378595	-	frameshift_variant	ENST00000448921.5:c.1111_1115del	ENSP00000416066.1:p.Ala371TrpfsTer28	1684-1688	1111-1115	371-372	AA/X	GCTGCt/t	1.193e-05	0	0	0.000298	0	0	0	0	0	-	-	-	-	27.9	-	-	-	-	-	-	-	-	-	-	-	-	-	-	-	-	-	-	-	-	-	-	-	-	-
rs864622043	14:94378590-94378598	TGTTTTT	frameshift_variant	ENST00000448921.5:c.1108_1115delinsAAAAACA	ENSP00000416066.1:p.Glu370LysfsTer8	1681-1688	1108-1115	370-372	EAA/KNX	GAAGCTGCt/AAAAACAt	-	-	-	-	-	-	-	-	-	pathogenic	30359090	-	-	-	-	-	-	-	-	-	-	-	-	-	-	-	-	-	-	-	-	-	-	-	-	-	-	-	-
rs1177953477	14:94378592-94378592	T	missense_variant	ENST00000448921.5:c.1114G>A	ENSP00000416066.1:p.Ala372Thr	1687	1114	372	A/T	Gct/Act	-	-	-	-	-	-	-	-	-	-	-	tolerated(0.17)	benign(0.147)	9.607	neutral(0.072)	T	0.4595	-0.0399891	T	0.17498	0.29276	0.79745	0.427939	-1.05133	0.86415	0.09799	0.43007	0.14045	N	D	0.56317	0.04917	D	0.82728	T	0.72614	Gain_of_catalytic_residue_at_A374_(P_=_0.011),_Gain_of_ubiquitination_at_K367_(P_=_0.0837),_Loss_of_phosphorylation_at_T369_(P_=_0.1093),_Gain_of_sheet_(P_=_0.1208),_Loss_of_helix_(P_=_0.1706)	0.85401	0.79137
rs754737768	14:94378596-94378596	TGTTT	frameshift_variant	ENST00000448921.5:c.1110_1111insAACA	ENSP00000416066.1:p.Ala371AsnfsTer31	1683	1110	370	E/ENX	gaA/gaAAACA	1.193e-05	0	0	0.000298	0	0	0	0	0	-	-	-	-	28.1	-	-	-	-	-	-	-	-	-	-	-	-	-	-	-	-	-	-	-	-	-	-	-	-	-
rs1443088374	14:94378597-94378597	C	missense_variant	ENST00000448921.5:c.1109A>G	ENSP00000416066.1:p.Glu370Gly	1682	1109	370	E/G	gAa/gGa	-	-	-	-	-	-	-	-	-	-	-	deleterious(0)	probably_damaging(0.986)	25.7	deleterious(0.879)	D	0.76965	0.232606	D	0.83912	0.84694	0.89368	2.55077	0.0532843	0.91134	0.40864	0.51787	0.3493	N	D	0.7753	0.32695	D	0.95945	D	0.95862	Gain_of_catalytic_residue_at_A372_(P_=_0),_Loss_of_disorder_(P_=_0.134),_Gain_of_ubiquitination_at_K367_(P_=_0.1375),_Loss_of_helix_(P_=_0.1706),_Gain_of_sheet_(P_=_0.1945)	0.73576	0.96185
rs756871122	14:94378598-94378598	T	missense_variant	ENST00000448921.5:c.1108G>A	ENSP00000416066.1:p.Glu370Lys	1681	1108	370	E/K	Gaa/Aaa	1.591e-05	0	0	0.0003971	0	0	0	0	0	-	-	deleterious(0.01)	possibly_damaging(0.788)	25.9	deleterious(0.701)	D	0.67851	0.135064	D	0.54978	0.93191	0.83468	3.3912	0.241079	0.90451	0.60666	0.74766	0.3493	N	D	0.74	0.22511	D	0.92743	D	0.94513	Gain_of_catalytic_residue_at_A372_(P_=_0.0017),_Gain_of_ubiquitination_at_E370_(P_=_0.0219),_Gain_of_glycosylation_at_E370_(P_=_0.0512),_Gain_of_MoRF_binding_(P_=_0.059),_Loss_of_helix_(P_=_0.1706)	0.77786	0.78713
rs551595739	14:94378603-94378603	T	missense_variant	ENST00000448921.5:c.1103G>A	ENSP00000416066.1:p.Gly368Glu	1676	1103	368	G/E	gGg/gAg	1.591e-05	0.0001846	0	0	5.437e-05	0	0	0	0	-	-	tolerated(0.08)	probably_damaging(0.996)	24.2	deleterious(0.762)	D	0.66163	0.117926	D	0.73341	0.59317	0.92116	3.70395	0.297766	0.92258	0.42236	0.74766	0.35606	N	D	0.70367	0.35684	D	0.97086	D	0.97343	Gain_of_catalytic_residue_at_A372_(P_=_0.0045),_Gain_of_disorder_(P_=_0.0818),_Gain_of_relative_solvent_accessibility_(P_=_0.09),_Gain_of_solvent_accessibility_(P_=_0.0971),_Loss_of_ubiquitination_at_K367_(P_=_0.1264)	0.95201	0.95555
rs755625134	14:94378606-94378606	G	missense_variant	ENST00000448921.5:c.1100A>C	ENSP00000416066.1:p.Lys367Thr	1673	1100	367	K/T	aAa/aCa	3.58e-05	0	0.0002604	0	0	0	0	0	0	-	-	tolerated(0.19)	benign(0.074)	14.22	neutral(0.054)	T	0.11	-0.276887	T	0.01608	0.18365	0.62188	0.31979	-1.15772	0.8791	0.06937	0.44625	0.16608	N	D	0.66577	0.06515	T	0.75324	T	0.57583	Gain_of_catalytic_residue_at_A372_(P_=_2e-04),_Loss_of_ubiquitination_at_K367_(P_=_0.0244),_Gain_of_phosphorylation_at_K367_(P_=_0.0558),_Loss_of_glycosylation_at_K367_(P_=_0.0584),_Loss_of_solvent_accessibility_(P_=_0.0674)	0.55489	0.33385
rs28929474	14:94378610-94378610	G	missense_variant	ENST00000448921.5:c.1096G>C	ENSP00000416066.1:p.Glu366Gln	1669	1096	366	E/Q	Gag/Cag	2.785e-05	0	0.0001736	0	0	0	0	0.000163	0	-	25741868,24033266,18414213,21935354,21228398,23696881,18974877,16608528,24055113,26917578,20981092,22975760,24082139,28289587,26771213,28887542,21625484,27005778,21067581,26174136,28029757,26304913,22426792,2696185,14985567,19956452,20170533,20301692,21138453,23837941,25454901,26831755,30739910,1608473,2339709,2575668,2700304,2904702,2989709,3259592,3264419,3484754,3537008,3875547,6306478,7045697…	deleterious(0)	probably_damaging(0.995)	24.2	deleterious(0.902)	T	0.55639	0.02937	D	0.53239	0.63549	0.93784	2.56724	0.057657	0.91903	0.33285	0.74766	0.31251	N	D	0.66079	0.33265	D	0.97294	D	0.95492	Gain_of_catalytic_residue_at_D365_(P_=_0.0327),_Gain_of_MoRF_binding_(P_=_0.0741),_Loss_of_ubiquitination_at_K367_(P_=_0.079),_Loss_of_disorder_(P_=_0.1118),_Gain_of_methylation_at_K367_(P_=_0.1847)	0.94662	0.95555
rs28929474	14:94378610-94378610	T	missense_variant	ENST00000448921.5:c.1096G>A	ENSP00000416066.1:p.Glu366Lys	1669	1096	366	E/K	Gag/Aag	0.01113	0.002892	0.00379	0.008436	0	0.01779	0.01841	0.008803	6.533e-05	other,pathogenic	25741868,24033266,18414213,21935354,21228398,23696881,18974877,16608528,24055113,26917578,20981092,22975760,24082139,28289587,26771213,28887542,21625484,27005778,21067581,26174136,28029757,26304913,22426792,2696185,14985567,19956452,20170533,20301692,21138453,23837941,25454901,26831755,30739910,1608473,2339709,2575668,2700304,2904702,2989709,3259592,3264419,3484754,3537008,3875547,6306478,7045697…	tolerated(0.07)	probably_damaging(1)	23.5	deleterious(0.819)	T	0.46348	-0.0373078	T	0.07252	0.89085	0.9308	2.42549	0.0190238	0.918	0.33285	0.74766	0.31251	N	-	-	0.34524	D	0.93962	D	0.91911	-	-	0.95555
rs201774333	14:94378611-94378611	C	missense_variant	ENST00000448921.5:c.1095C>G	ENSP00000416066.1:p.Asp365Glu	1668	1095	365	D/E	gaC/gaG	2.785e-05	0	8.68e-05	0	0	0	3.518e-05	0	0	-	-	deleterious(0.03)	possibly_damaging(0.715)	5.227	deleterious(0.623)	T	0.30318	-0.137307	D	0.49893	0.37349	0.82692	0.407677	-1.06961	0.89145	0.01027	0.74766	0.27594	N	D	0.61602	0.20479	D	0.91717	D	0.90194	-	-	0.94693
rs864622046	14:94378612-94378612	A	missense_variant	ENST00000448921.5:c.1094A>T	ENSP00000416066.1:p.Asp365Val	1667	1094	365	D/V	gAc/gTc	-	-	-	-	-	-	-	-	-	likely_benign,uncertain_significance	31307431	deleterious(0)	probably_damaging(0.995)	24.9	deleterious(0.902)	D	0.8411	0.314972	D	0.45811	0.28875	0.91336	2.359	-4.73092e-05	0.89561	0.40864	0.74766	0.27594	N	D	0.80302	0.36634	D	0.95428	D	0.94757	Gain_of_catalytic_residue_at_D365_(P_=_0.0024),_Gain_of_MoRF_binding_(P_=_0.0549),_Loss_of_disorder_(P_=_0.0557),_Gain_of_methylation_at_K367_(P_=_0.0953),_Gain_of_sheet_(P_=_0.1208)	0.84047	0.971
rs143370956	14:94378613-94378613	A	missense_variant	ENST00000448921.5:c.1093G>T	ENSP00000416066.1:p.Asp365Tyr	1666	1093	365	D/Y	Gac/Tac	-	-	-	-	-	-	-	-	-	likely_benign	24895604,2240842	deleterious(0)	probably_damaging(0.996)	23.2	deleterious(0.906)	D	0.80793	0.273966	D	0.53963	0.42144	0.89078	1.65087	-0.258989	0.89627	0.33575	0.74766	0.27594	N	D	0.7633	0.35258	D	0.94472	D	0.9372	Gain_of_catalytic_residue_at_T369_(P_=_0.0297),_Loss_of_disorder_(P_=_0.043),_Loss_of_ubiquitination_at_K367_(P_=_0.079),_Gain_of_MoRF_binding_(P_=_0.081),_Gain_of_sheet_(P_=_0.1208)	0.83398	0.92865
rs143370956	14:94378613-94378613	G	missense_variant	ENST00000448921.5:c.1093G>C	ENSP00000416066.1:p.Asp365His	1666	1093	365	D/H	Gac/Cac	3.183e-05	0	0	0	0	0	2.639e-05	0	0.0001633	-	24895604,2240842	tolerated(0.19)	possibly_damaging(0.781)	21.3	neutral(0.342)	T	0.58026	0.0475427	D	0.4263	0.40618	0.83153	1.37446	-0.398701	0.89496	0.33575	0.74766	0.27594	N	D	0.73705	0.29813	D	0.91686	D	0.89314	Gain_of_catalytic_residue_at_T369_(P_=_0.0436),_Gain_of_methylation_at_K367_(P_=_0.0681),_Gain_of_MoRF_binding_(P_=_0.0786),_Loss_of_ubiquitination_at_K367_(P_=_0.0957),_Gain_of_sheet_(P_=_0.1208)	0.79885	0.86243
rs143370956	14:94378613-94378613	T	missense_variant	ENST00000448921.5:c.1093G>A	ENSP00000416066.1:p.Asp365Asn	1666	1093	365	D/N	Gac/Aac	0.0001194	0.001538	0.0001157	0	0	0	0	0	3.266e-05	other,benign,likely_benign	24895604,2240842	tolerated(0.06)	possibly_damaging(0.585)	21.6	deleterious(0.524)	T	0.02385	-0.398024	T	0.05769	0.64276	0.64534	1.1681	-0.521104	0.87038	0.33575	0.74766	0.27594	N	D	0.67226	0.13811	D	0.82859	T	0.80715	-	-	0.19266
rs772289957	14:94378614-94378614	C	missense_variant	ENST00000448921.5:c.1092C>G	ENSP00000416066.1:p.Ile364Met	1665	1092	364	I/M	atC/atG	3.979e-06	0	0	0	0	0	0	0	3.267e-05	-	-	tolerated(0.11)	benign(0.341)	0.054	neutral(0.379)	T	0.29107	-0.144941	T	0.27317	0.19464	0.74865	0.0269266	-1.8522	0.88689	0.00473	0.74766	0.15073	N	D	0.85963	0.09718	D	0.82897	T	0.74	Gain_of_catalytic_residue_at_K359_(P_=_0.0289),_Gain_of_disorder_(P_=_0.0323),_Gain_of_phosphorylation_at_T369_(P_=_0.0783),_Loss_of_methylation_at_K359_(P_=_0.1025),_Gain_of_ubiquitination_at_K367_(P_=_0.1128)	0.91139	0.32671
rs201318727	14:94378616-94378616	C	missense_variant	ENST00000448921.5:c.1090A>G	ENSP00000416066.1:p.Ile364Val	1663	1090	364	I/V	Atc/Gtc	5.968e-05	0	8.682e-05	0	0	0	0.0001055	0	0	-	-	tolerated(0.38)	benign(0.031)	0.741	neutral(0.019)	T	0.07348	-0.314615	T	0.14891	0.01643	0.52548	0.190822	-1.32882	0.83413	0.10461	0.42865	0.15073	N	D	0.55965	0.04339	T	0.59007	T	0.4371	-	-	0.02337
rs1482108138	14:94378619-94378619	C	missense_variant	ENST00000448921.5:c.1087A>G	ENSP00000416066.1:p.Thr363Ala	1660	1087	363	T/A	Acc/Gcc	3.979e-06	0	0	0	0	0	0	0	3.266e-05	-	-	deleterious(0.01)	benign(0.073)	22.7	neutral(0.411)	T	0.47385	-0.0302191	T	0.24983	0.16893	0.7705	1.09145	-0.570175	0.87671	0.40616	0.51787	0.1476	N	D	0.7862	0.19376	D	0.84756	D	0.84063	Gain_of_catalytic_residue_at_K359_(P_=_0.0519),_Loss_of_phosphorylation_at_T363_(P_=_0.0654),_Loss_of_methylation_at_K359_(P_=_0.1048),_Loss_of_ubiquitination_at_K367_(P_=_0.1423),_Loss_of_sheet_(P_=_0.1501)	0.5581	0.66415
rs1378650955	14:94378621-94378621	G	missense_variant	ENST00000448921.5:c.1085T>C	ENSP00000416066.1:p.Leu362Pro	1658	1085	362	L/P	cTg/cCg	-	-	-	-	-	-	-	-	-	-	-	deleterious(0)	probably_damaging(1)	31	deleterious(0.945)	D	0.9405	0.491571	D	0.93161	0.90677	0.90709	5.16932	0.501149	0.91643	0.40616	0.74766	0.22338	N	D	0.85542	0.38869	D	0.96906	D	0.96224	Gain_of_catalytic_residue_at_K359_(P_=_0.0107),_Gain_of_disorder_(P_=_0.0128),_Loss_of_stability_(P_=_0.0311),_Gain_of_methylation_at_K359_(P_=_0.043),_Gain_of_glycosylation_at_T363_(P_=_0.0591)	0.95547	0.97912
rs1131154	14:94378622-94378622	T	missense_variant	ENST00000448921.5:c.1084C>A	ENSP00000416066.1:p.Leu362Met	1657	1084	362	L/M	Ctg/Atg	-	-	-	-	-	-	-	-	-	-	-	deleterious(0.03)	probably_damaging(0.993)	25.1	deleterious(0.815)	T	0.60189	0.0646112	D	0.5866	0.52396	0.65852	2.51375	0.0433865	0.91192	0.31881	0.45458	0.22338	N	D	0.76154	0.32585	D	0.93579	D	0.92267	Gain_of_catalytic_residue_at_K359_(P_=_0.032),_Gain_of_methylation_at_K359_(P_=_0.0672),_Gain_of_disorder_(P_=_0.0828),_Loss_of_ubiquitination_at_K367_(P_=_0.1423),_Gain_of_MoRF_binding_(P_=_0.1618)	0.88806	0.87014
rs1131139	14:94378624-94378624	C	missense_variant	ENST00000448921.5:c.1082T>G	ENSP00000416066.1:p.Val361Gly	1655	1082	361	V/G	gTg/gGg	3.979e-06	6.155e-05	0	0	0	0	0	0	0	-	-	deleterious(0)	probably_damaging(0.919)	24.4	deleterious(0.814)	T	0.57082	0.04027	D	0.52589	0.67403	0.81347	2.33624	-0.00674052	0.85173	0.40864	0.51787	0.12241	N	D	0.72856	0.36127	D	0.93234	D	0.90902	Loss_of_stability_(P_=_8e-04),_Gain_of_disorder_(P_=_0.0284),_Gain_of_catalytic_residue_at_K359_(P_=_0.0292),_Gain_of_ubiquitination_at_K359_(P_=_0.0581),_Loss_of_methylation_at_K359_(P_=_0.1)	0.84411	0.91902
rs1131139	14:94378624-94378624	G	missense_variant	ENST00000448921.5:c.1082T>C	ENSP00000416066.1:p.Val361Ala	1655	1082	361	V/A	gTg/gCg	-	-	-	-	-	-	-	-	-	-	-	deleterious(0.04)	possibly_damaging(0.479)	23.6	deleterious(0.507)	T	0.48805	-0.0203376	D	0.44546	0.38294	0.77674	1.56349	-0.30027	0.84701	0.40864	0.51787	0.12241	N	D	0.69744	0.1501	D	0.87383	T	0.81575	Gain_of_catalytic_residue_at_K359_(P_=_0.0084),_Loss_of_stability_(P_=_0.0238),_Gain_of_disorder_(P_=_0.0483),_Loss_of_methylation_at_K359_(P_=_0.0607),_Gain_of_ubiquitination_at_K359_(P_=_0.0707)	0.84229	0.45626
rs72555357	14:94378624-94378625	-	frameshift_variant	ENST00000448921.5:c.1081del	ENSP00000416066.1:p.Val361CysfsTer2	1654	1081	361	V/X	Gtg/tg	-	-	-	-	-	-	-	-	-	-	-	-	-	-	-	-	-	-	-	-	-	-	-	-	-	-	-	-	-	-	-	-	-	-	-	-	-	-	-
rs1450256967	14:94378625-94378625	T	missense_variant	ENST00000448921.5:c.1081G>A	ENSP00000416066.1:p.Val361Met	1654	1081	361	V/M	Gtg/Atg	-	-	-	-	-	-	-	-	-	-	-	tolerated(0.17)	possibly_damaging(0.69)	19.15	neutral(0.306)	T	0.53026	0.0100092	D	0.47482	0.79108	0.64688	2.01998	-0.109575	0.85091	0.43823	0.51787	0.12241	N	D	0.60207	0.20155	D	0.88527	T	0.81962	Gain_of_catalytic_residue_at_V357_(P_=_0.003),_Gain_of_disorder_(P_=_0.0788),_Loss_of_methylation_at_K359_(P_=_0.1135),_Loss_of_phosphorylation_at_T363_(P_=_0.1211),_Loss_of_stability_(P_=_0.1679)	0.83118	0.68558
rs762930016	14:94378627-94378627	T	missense_variant	ENST00000448921.5:c.1079C>A	ENSP00000416066.1:p.Ala360Asp	1652	1079	360	A/D	gCt/gAt	-	-	-	-	-	-	-	-	-	-	-	deleterious(0)	probably_damaging(0.99)	28.2	deleterious(0.886)	D	0.91767	0.43474	D	0.90938	0.73454	0.91946	6.40352	0.614031	0.87433	0.60666	0.74766	0.43931	D	D	0.80378	0.37885	D	0.95424	D	0.95804	Gain_of_catalytic_residue_at_K359_(P_=_0.0318),_Gain_of_ubiquitination_at_K359_(P_=_0.0799),_Loss_of_methylation_at_K359_(P_=_0.0955),_Gain_of_sheet_(P_=_0.1208),_Gain_of_disorder_(P_=_0.1444)	0.96265	0.989
rs1802959	14:94378628-94378628	G	missense_variant	ENST00000448921.5:c.1078G>C	ENSP00000416066.1:p.Ala360Pro	1651	1078	360	A/P	Gct/Cct	3.98e-06	0	0	0	0	0	8.799e-06	0	0	-	2185272,2240842	deleterious(0)	probably_damaging(0.998)	27.5	deleterious(0.919)	D	0.91388	0.427168	D	0.93999	0.79241	0.91995	6.93607	0.651649	0.87433	0.60666	0.74766	0.43931	D	D	0.76797	0.36118	D	0.96102	D	0.97974	Gain_of_catalytic_residue_at_K359_(P_=_0.0014),_Gain_of_methylation_at_K359_(P_=_0.0786),_Gain_of_disorder_(P_=_0.1035),_Gain_of_sheet_(P_=_0.1208),_Loss_of_stability_(P_=_0.1551)	0.95259	0.96283
rs1802959	14:94378628-94378628	T	missense_variant	ENST00000448921.5:c.1078G>A	ENSP00000416066.1:p.Ala360Thr	1651	1078	360	A/T	Gct/Act	1.99e-05	0	0	0	0	0	2.64e-05	0.0001631	3.267e-05	other,pathogenic,uncertain_significance	2185272,2240842	tolerated(0.06)	possibly_damaging(0.864)	24.7	deleterious(0.657)	D	0.84562	0.321258	D	0.64512	0.97199	0.82025	5.24393	0.509244	0.86415	0.60666	0.74766	0.43931	D	D	0.77494	0.32824	D	0.92412	D	0.93467	Gain_of_catalytic_residue_at_K359_(P_=_0.0068),_Gain_of_sheet_(P_=_0.1208),_Gain_of_methylation_at_K359_(P_=_0.128),_Loss_of_helix_(P_=_0.1706),_Gain_of_disorder_(P_=_0.1792)	0.96425	0.77386
rs796549685	14:94378630-94378630	A	missense_variant	ENST00000448921.5:c.1076A>T	ENSP00000416066.1:p.Lys359Met	1649	1076	359	K/M	aAg/aTg	-	-	-	-	-	-	-	-	-	-	-	deleterious(0.02)	probably_damaging(0.99)	25.3	deleterious(0.825)	D	0.65016	0.106776	D	0.8527	0.39842	0.90829	2.01775	-0.110371	0.8791	0.19456	0.45129	0.29727	N	D	0.73797	0.32158	D	0.94411	D	0.90022	Loss_of_methylation_at_K359_(P_=_0.0164),_Loss_of_ubiquitination_at_K359_(P_=_0.0546),_Gain_of_stability_(P_=_0.097),_Loss_of_disorder_(P_=_0.0989),_Gain_of_sheet_(P_=_0.1208)	0.91726	0.98156
rs200945035	14:94378631-94378631	C	missense_variant	ENST00000448921.5:c.1075A>G	ENSP00000416066.1:p.Lys359Glu	1648	1075	359	K/E	Aag/Gag	0.0001393	0	0	0	0.001904	0	0	0	0	uncertain_significance	-	deleterious(0.03)	possibly_damaging(0.767)	25.3	deleterious(0.649)	T	0.43536	-0.0559729	T	0.27897	0.55808	0.84906	2.10274	-0.0807481	0.87038	0.40864	0.51787	0.29727	N	D	0.62943	0.21326	D	0.92195	D	0.92262	-	-	0.92451
rs1555367892	14:94378632-94378634	-	frameshift_variant	ENST00000448921.5:c.1072_1073del	ENSP00000416066.1:p.His358Ter	1645-1646	1072-1073	358	H/X	CAt/t	-	-	-	-	-	-	-	-	-	pathogenic	-	-	-	-	-	-	-	-	-	-	-	-	-	-	-	-	-	-	-	-	-	-	-	-	-	-	-	-	-
rs1555367891	14:94378633-94378633	C	missense_variant	ENST00000448921.5:c.1073A>G	ENSP00000416066.1:p.His358Arg	1646	1073	358	H/R	cAt/cGt	-	-	-	-	-	-	-	-	-	likely_pathogenic	-	deleterious(0)	probably_damaging(0.99)	26.8	deleterious(0.886)	D	0.93507	0.474624	D	0.94856	0.6124	0.92296	4.49191	0.41849	0.92158	0.60666	0.74766	0.62929	D	D	0.80576	0.3515	D	0.97036	D	0.98165	Gain_of_MoRF_binding_(P_=_0.0163),_Gain_of_catalytic_residue_at_K359_(P_=_0.0766),_Loss_of_sheet_(P_=_0.1158),_Gain_of_helix_(P_=_0.132),_Loss_of_methylation_at_K359_(P_=_0.1435)	0.91726	0.97651
rs373630097	14:94378637-94378637	A	missense_variant	ENST00000448921.5:c.1069G>T	ENSP00000416066.1:p.Val357Leu	1642	1069	357	V/L	Gtg/Ttg	3.983e-06	6.159e-05	0	0	0	0	0	0	0	-	-	tolerated(0.45)	benign(0.073)	0.033	neutral(0.017)	T	0.08432	-0.30243	T	0.0742	0.04141	0.51842	0.0324072	-1.81016	0.8397	0.01094	0.74766	0.03158	N	D	0.67576	0.05727	T	0.65861	T	0.57362	Gain_of_catalytic_residue_at_K359_(P_=_0.1011),_Loss_of_sheet_(P_=_0.1158),_Loss_of_methylation_at_K359_(P_=_0.1188),_Gain_of_ubiquitination_at_K352_(P_=_0.1686),_Gain_of_disorder_(P_=_0.1772)	0.8377	0.08236
rs373630097	14:94378637-94378637	T	missense_variant	ENST00000448921.5:c.1069G>A	ENSP00000416066.1:p.Val357Met	1642	1069	357	V/M	Gtg/Atg	0.0004461	6.159e-05	2.895e-05	0	0	0	8.807e-06	0.0006534	0.003431	-	-	tolerated(0.08)	possibly_damaging(0.728)	3.926	deleterious(0.565)	T	0.13882	-0.251767	T	0.09479	0.51505	0.59985	0.246775	-1.24592	0.85703	0.01094	0.74766	0.03158	N	-	-	0.16644	D	0.85834	T	0.82062	-	-	0.53793
rs1555367896	14:94378640-94379463	CCT	splice_donor_variant,stop_lost,protein_altering_variant,intron_variant	ENST00000448921.5:c.1065+2_1066del	ENSP00000416066.1:p.Val356delinsAla	1637-1639	1064-1066	355-356	KVRSP*RPCCTLVSVGKNVWGLQLCPEAEEGAEGNK*RPRLSS*RCP*FTDTGRGQTAKPGRGLLCSWHFRGLP*GCVTDPEFQLCPRPSRHWALIYPY*HRKVWAKLFQRNF*LLRSVRFGV*INE*FQLKMTLILEN*RRPMNNCSSMNGCIILGSGHCEGHCQGPCPQGASSRVLERREPWRQTWSDDALPCSELWVHLSRGRGACQEDGQRGASPISQSLEEEQGLCDREGEDVQGQGRPGGVSASWEVST*ALLEAWDQPYNVSLLLSPPGX/KA	aAGGTGAGATCACCCTGACGACCTTGTTGCACCCTGGTATCTGTAGGGAAGAATGTGTGGGGGCTGCAGCTCTGTCCTGAGGCTGAGGAAGGGGCCGAGGGAAACAAATGAAGACCCAGGCTGAGCTCCTGAAGATGCCCGTGATTCACTGACACGGGACGTGGTCAAACAGCAAAGCCAGGCAGGGGACTGCTGTGCAGCTGGCACTTTCGGGGCCTCCCTTGAGGTTGTGTCACTGACCCTGAATTTCAACTTTGCCCAAGACCTTCTAGACATTGGGCCTTGATTTATCCATACTGACACAGAAAGGTTTGGGCTAAGTTGTTTCAAAGGAATTTCTGACTCCTTCGATCTGTGAGATTTGGTGTCTGAATTAATGAATGATTTCAGCTAAAGATG…	-	-	-	-	-	-	-	-	-	pathogenic	-	-	-	-	-	-	-	-	-	-	-	-	-	-	-	-	-	-	-	-	-	-	-	-	-	-	-	-	-
rs1555367897	14:94378641-94378641	A	splice_acceptor_variant	ENST00000448921.5:c.1066-1G>T	-	-	-	-	-	-	-	-	-	-	-	-	-	-	-	likely_pathogenic	-	-	-	34	-	-	-	-	-	-	-	-	-	-	-	-	-	-	-	-	-	-	-	-	-	-	-	-	-
rs781651982	14:94378642-94378642	TT	splice_acceptor_variant	ENST00000448921.5:c.1066-2dup	-	-	-	-	-	-	-	-	-	-	-	-	-	-	-	-	-	-	-	-	-	-	-	-	-	-	-	-	-	-	-	-	-	-	-	-	-	-	-	-	-	-	-	-	-
rs879042153	14:94379462-94379462	G	splice_donor_variant	ENST00000448921.5:c.1065+2T>C	-	-	-	-	-	-	-	-	-	-	-	-	-	-	-	-	-	-	-	33	-	-	-	-	-	-	-	-	-	-	-	-	-	-	-	-	-	-	-	-	-	-	-	-	-
rs781591420	14:94379463-94379463	T	splice_donor_variant	ENST00000448921.5:c.1065+1G>A	-	-	-	-	-	-	3.977e-06	0	0	0	0	0	8.795e-06	0	0	-	30223862	-	-	35	-	-	-	-	-	-	-	-	-	-	-	-	-	-	-	-	-	-	-	-	-	-	-	-	-
rs864622055	14:94379465-94379465	C	missense_variant,splice_region_variant	ENST00000448921.5:c.1064A>G	ENSP00000416066.1:p.Lys355Arg	1637	1064	355	K/R	aAg/aGg	-	-	-	-	-	-	-	-	-	likely_benign	-	deleterious(0.04)	benign(0.432)	29.2	deleterious(0.489)	T	0.47539	-0.0291671	D	0.53771	0.90764	0.63306	4.51233	0.421234	0.88689	0.77279	0.74766	0.29372	N	D	0.61641	0.21887	D	0.90152	D	0.90172	Gain_of_catalytic_residue_at_K359_(P_=_0.0044),_Loss_of_disorder_(P_=_0.086),_Gain_of_ubiquitination_at_K352_(P_=_0.0955),_Loss_of_methylation_at_K359_(P_=_0.1119),_Gain_of_sheet_(P_=_0.1208)	0.72236	0.75369
rs201788603	14:94379468-94379468	A	missense_variant	ENST00000448921.5:c.1061C>T	ENSP00000416066.1:p.Ser354Phe	1634	1061	354	S/F	tCc/tTc	0.0001472	0	8.673e-05	0	0	0	0.0002814	0	6.533e-05	uncertain_significance	-	deleterious(0)	probably_damaging(0.98)	26.2	deleterious(0.869)	D	0.92082	0.44133	D	0.37439	0.89885	0.90069	7.58398	0.690821	0.91019	0.5377	0.74766	0.39743	N	D	0.70985	0.30363	D	0.96768	D	0.982	-	-	0.94815
rs866203136	14:94379472-94379472	A	missense_variant	ENST00000448921.5:c.1057C>T	ENSP00000416066.1:p.Leu353Phe	1630	1057	353	L/F	Ctc/Ttc	-	-	-	-	-	-	-	-	-	-	-	deleterious(0.01)	probably_damaging(0.968)	21.4	deleterious(0.816)	T	0.49711	-0.0139502	D	0.60745	0.67403	0.81862	0.925586	-0.682063	0.8601	0.0045	0.74766	0.11713	N	D	0.7106	0.32043	D	0.92436	D	0.89057	Gain_of_methylation_at_K352_(P_=_0.0365),_Gain_of_sheet_(P_=_0.1208),_Gain_of_glycosylation_at_S354_(P_=_0.1442),_Loss_of_disorder_(P_=_0.1454),_Loss_of_helix_(P_=_0.1706)	0.77352	0.91446
rs72555374	14:94379476-94379477	-	frameshift_variant	ENST00000448921.5:c.1052del	ENSP00000416066.1:p.Leu351ArgfsTer12	1625	1052	351	L/X	cTg/cg	-	-	-	-	-	-	-	-	-	-	-	-	-	-	-	-	-	-	-	-	-	-	-	-	-	-	-	-	-	-	-	-	-	-	-	-	-	-	-
rs1425102569	14:94379477-94379477	C	missense_variant	ENST00000448921.5:c.1052T>G	ENSP00000416066.1:p.Leu351Arg	1625	1052	351	L/R	cTg/cGg	-	-	-	-	-	-	-	-	-	-	-	deleterious(0)	probably_damaging(0.999)	29	deleterious(0.935)	D	0.89552	0.393776	D	0.92644	0.79307	0.90314	4.41233	0.407546	0.88533	0.77279	0.74766	0.53742	D	D	0.70356	0.37584	D	0.95499	D	0.89879	Gain_of_MoRF_binding_(P_=_0.0331),_Gain_of_methylation_at_K355_(P_=_0.0338),_Gain_of_disorder_(P_=_0.0398),_Gain_of_phosphorylation_at_S354_(P_=_0.0728),_Gain_of_glycosylation_at_P350_(P_=_0.121)	0.94905	0.97394
rs1322791235	14:94379478-94379478	T	missense_variant	ENST00000448921.5:c.1051C>A	ENSP00000416066.1:p.Leu351Met	1624	1051	351	L/M	Ctg/Atg	3.977e-06	0	0	0	0	0	8.794e-06	0	0	-	-	deleterious(0)	probably_damaging(0.999)	24.5	deleterious(0.935)	D	0.65248	0.108991	D	0.72329	0.60091	0.82706	2.68713	0.0883415	0.8822	0.30173	0.4628	0.53742	D	T	0.45645	0.32479	D	0.9508	D	0.88017	Gain_of_ubiquitination_at_K352_(P_=_0.0955),_Gain_of_methylation_at_K355_(P_=_0.1087),_Gain_of_disorder_(P_=_0.1177),_Loss_of_sheet_(P_=_0.1398),_Gain_of_catalytic_residue_at_T346_(P_=_0.2111)	0.87816	0.94526
rs770030839	14:94379480-94379480	A	missense_variant	ENST00000448921.5:c.1049C>T	ENSP00000416066.1:p.Pro350Leu	1622	1049	350	P/L	cCc/cTc	1.193e-05	0	0	0	0	0	2.638e-05	0	0	-	-	deleterious(0.01)	benign(0.082)	21.9	neutral(0.412)	T	0.51469	-0.00134329	D	0.34538	0.2018	0.81186	1.12031	-0.551523	0.88377	0.25203	0.44625	0.16568	N	D	0.76395	0.313	D	0.8444	T	0.76494	Gain_of_catalytic_residue_at_V345_(P_=_0.0155),_Loss_of_disorder_(P_=_0.031),_Loss_of_loop_(P_=_0.1242),_Loss_of_sheet_(P_=_0.1398),_Gain_of_ubiquitination_at_K352_(P_=_0.2249)	0.48322	0.60663
rs377739083	14:94379481-94379481	A	missense_variant	ENST00000448921.5:c.1048C>T	ENSP00000416066.1:p.Pro350Ser	1621	1048	350	P/S	Ccc/Tcc	7.954e-06	0	0	9.927e-05	0	0	8.794e-06	0	0	-	-	tolerated(0.23)	benign(0.014)	12.86	neutral(0.042)	T	0.44248	-0.0513144	T	0.06027	0.16167	0.76467	0.655308	-0.874131	0.87671	0.27816	0.45129	0.16568	N	D	0.65431	0.1147	D	0.81469	T	0.71153	-	-	0.30464
rs376024688	14:94379484-94379484	G	missense_variant	ENST00000448921.5:c.1045G>C	ENSP00000416066.1:p.Ala349Pro	1618	1045	349	A/P	Gca/Cca	3.977e-06	0	0	0	0	0	8.794e-06	0	0	-	31307431	tolerated(0.26)	benign(0.003)	2.937	neutral(0.034)	T	0.31633	-0.129159	T	0.16373	0.25067	0.51262	0.648959	-0.87876	0.84415	0.21647	0.43304	0.0269	U	D	0.70609	0.05882	T	0.79089	T	0.63401	-	-	0.09922
rs1175196821	14:94379488-94379490	CT	frameshift_variant	ENST00000448921.5:c.1040_1041del	ENSP00000416066.1:p.Glu347GlyfsTer12	1611-1614	1038-1041	346-347	TE/TX	acAGAG/acAG	-	-	-	-	-	-	-	-	-	-	-	-	-	23.1	-	-	-	-	-	-	-	-	-	-	-	-	-	-	-	-	-	-	-	-	-	-	-	-	-
rs926110466	14:94379489-94379489	G	missense_variant	ENST00000448921.5:c.1040A>C	ENSP00000416066.1:p.Glu347Ala	1613	1040	347	E/A	gAg/gCg	-	-	-	-	-	-	-	-	-	-	-	deleterious(0.03)	benign(0.184)	17.87	neutral(0.382)	T	0.49821	-0.013167	T	0.20868	0.40251	0.77214	0.95095	-0.66455	0.88298	0.32523	0.46732	0.02607	N	D	0.6851	0.12873	D	0.8725	T	0.68725	Gain_of_catalytic_residue_at_V345_(P_=_0.0022),_Loss_of_disorder_(P_=_0.0502),_Gain_of_sheet_(P_=_0.1208),_Loss_of_solvent_accessibility_(P_=_0.1459),_Loss_of_loop_(P_=_0.2237)	0.50616	0.47472
rs797013882	14:94379490-94379490	G	missense_variant	ENST00000448921.5:c.1039G>C	ENSP00000416066.1:p.Glu347Gln	1612	1039	347	E/Q	Gag/Cag	-	-	-	-	-	-	-	-	-	-	-	tolerated(0.11)	benign(0.058)	7.234	neutral(0.275)	T	0.41274	-0.0703212	T	0.08511	0.20755	0.59623	0.494588	-0.995425	0.88298	0.16056	0.43304	0.02607	N	D	0.67521	0.06789	D	0.85582	T	0.67413	Gain_of_catalytic_residue_at_V345_(P_=_0.008),_Loss_of_disorder_(P_=_0.0941),_Loss_of_sheet_(P_=_0.1398),_Loss_of_ubiquitination_at_K352_(P_=_0.2282),_Loss_of_helix_(P_=_0.2662)	0.44381	0.64187
rs1425620023	14:94379492-94379492	AC	frameshift_variant	ENST00000448921.5:c.1036_1037insGT	ENSP00000416066.1:p.Thr346SerfsTer7	1609-1610	1036-1037	346	T/SX	aca/aGTca	-	-	-	-	-	-	-	-	-	-	-	-	-	24.1	-	-	-	-	-	-	-	-	-	-	-	-	-	-	-	-	-	-	-	-	-	-	-	-	-
rs796680542	14:94379492-94379492	C	missense_variant	ENST00000448921.5:c.1037C>G	ENSP00000416066.1:p.Thr346Arg	1610	1037	346	T/R	aCa/aGa	-	-	-	-	-	-	-	-	-	-	-	deleterious(0)	probably_damaging(0.93)	22.6	deleterious(0.821)	D	0.66712	0.123407	D	0.57133	0.6124	0.85948	2.86031	0.129878	0.84919	0.53973	0.74766	0.31013	N	D	0.64618	0.34745	D	0.93365	D	0.93012	Gain_of_catalytic_residue_at_V345_(P_=_0.0284),_Gain_of_solvent_accessibility_(P_=_0.0584),_Gain_of_methylation_at_T346_(P_=_0.0772),_Gain_of_relative_solvent_accessibility_(P_=_0.09),_Gain_of_phosphorylation_at_S343_(P_=_0.1123)	0.88725	0.92918
rs761711628	14:94379496-94379496	A	missense_variant	ENST00000448921.5:c.1033G>T	ENSP00000416066.1:p.Val345Phe	1606	1033	345	V/F	Gtc/Ttc	0.0001392	0	0	0	0	0	5.276e-05	0.0001629	0.0009146	-	-	deleterious(0)	possibly_damaging(0.626)	16.18	deleterious(0.662)	T	0.54357	0.0198293	T	0.24581	0.68499	0.77967	1.1338	-0.542818	0.84415	0.14178	0.43007	0.25183	N	D	0.71041	0.07511	D	0.81888	T	0.72891	Gain_of_catalytic_residue_at_A340_(P_=_0.01),_Loss_of_disorder_(P_=_0.1965),_Loss_of_stability_(P_=_0.348),_Gain_of_phosphorylation_at_T346_(P_=_0.4419),_Loss_of_glycosylation_at_S343_(P_=_0.468)	0.72973	0.45938
rs761711628	14:94379496-94379496	T	missense_variant	ENST00000448921.5:c.1033G>A	ENSP00000416066.1:p.Val345Ile	1606	1033	345	V/I	Gtc/Atc	-	-	-	-	-	-	-	-	-	-	-	tolerated(1)	benign(0)	0.223	neutral(0.000)	T	0.21931	-0.192232	T	0.02978	0.00816	0.46452	0.26407	-1.22335	0.819	0.14178	0.43007	0.25183	N	D	0.58429	0.04121	T	0.46477	T	0.50074	Gain_of_catalytic_residue_at_A340_(P_=_0.0184),_Loss_of_disorder_(P_=_0.1934),_Gain_of_glycosylation_at_S343_(P_=_0.4462),_Loss_of_phosphorylation_at_T346_(P_=_0.4704),_Loss_of_helix_(P_=_0.4763)	0.6068	0.00422
rs772059003	14:94379498-94379498	A	missense_variant	ENST00000448921.5:c.1031G>T	ENSP00000416066.1:p.Gly344Val	1604	1031	344	G/V	gGg/gTg	3.977e-06	0	0	0	0	0	0	0	3.266e-05	-	-	deleterious(0)	probably_damaging(0.998)	23.2	deleterious(0.919)	D	0.8932	0.389904	D	0.99993	0.79174	0.8955	4.12954	0.366549	0.89953	0.54382	0.74766	0.62929	D	D	0.72488	0.35814	D	0.95369	D	0.95859	Gain_of_catalytic_residue_at_A340_(P_=_0.0347),_Loss_of_disorder_(P_=_0.0419),_Loss_of_glycosylation_at_S343_(P_=_0.1762),_Loss_of_loop_(P_=_0.2237),_Loss_of_helix_(P_=_0.2662)	0.88066	0.9936
rs367797069	14:94379499-94379499	T	missense_variant	ENST00000448921.5:c.1030G>A	ENSP00000416066.1:p.Gly344Arg	1603	1030	344	G/R	Ggg/Agg	7.955e-05	0	8.673e-05	0	5.437e-05	0	9.673e-05	0	0.0001633	-	-	deleterious(0.02)	possibly_damaging(0.888)	23.3	deleterious(0.730)	D	0.88542	0.377458	D	0.5055	0.96049	0.83063	3.5523	0.270992	0.89692	0.54382	0.74766	0.62929	D	D	0.78371	0.35239	D	0.92768	D	0.9306	-	-	0.85499
rs1057519610	14:94379501-94379503	GAG	frameshift_variant	ENST00000448921.5:c.1027_1028del	ENSP00000416066.1:p.Ser343ArgfsTer16	1597-1601	1024-1028	342-343	LS/LX	CTCTCc/CTCc	-	-	-	-	-	-	-	-	-	-	14985567,2807278,3259232	-	-	-	-	-	-	-	-	-	-	-	-	-	-	-	-	-	-	-	-	-	-	-	-	-	-	-	-
rs1400497428	14:94379502-94379502	C	missense_variant	ENST00000448921.5:c.1027T>G	ENSP00000416066.1:p.Ser343Ala	1600	1027	343	S/A	Tcc/Gcc	-	-	-	-	-	-	-	-	-	likely_benign	-	deleterious(0)	probably_damaging(0.993)	24.8	deleterious(0.895)	D	0.7697	0.232653	D	0.46008	0.79507	0.87255	7.13239	0.664211	0.90566	0.77279	0.74766	0.62929	D	D	0.7423	0.29244	D	0.958	D	0.9703	Gain_of_catalytic_residue_at_D341_(P_=_0.0054),_Loss_of_disorder_(P_=_0.0724),_Loss_of_glycosylation_at_S343_(P_=_0.1309),_Loss_of_loop_(P_=_0.2237),_Loss_of_relative_solvent_accessibility_(P_=_0.3219)	0.87816	0.94857
rs28929471	14:94379508-94379508	T	missense_variant	ENST00000448921.5:c.1021G>A	ENSP00000416066.1:p.Asp341Asn	1594	1021	341	D/N	Gac/Aac	-	-	-	-	-	-	-	-	-	-	18974877	deleterious(0.05)	possibly_damaging(0.706)	24.6	deleterious(0.599)	T	0.50551	-0.00795899	D	0.74058	0.95892	0.82737	4.28035	0.388847	0.89757	0.53973	0.74766	0.42799	D	D	0.5713	0.06622	D	0.90593	D	0.91363	Gain_of_catalytic_residue_at_D341_(P_=_0.0034),_Loss_of_stability_(P_=_0.1905),_Loss_of_disorder_(P_=_0.2426),_Loss_of_helix_(P_=_0.2662),_Gain_of_MoRF_binding_(P_=_0.3398)	0.86367	0.65257
rs1343661824	14:94379510-94379510	A	missense_variant	ENST00000448921.5:c.1019C>T	ENSP00000416066.1:p.Ala340Val	1592	1019	340	A/V	gCt/gTt	-	-	-	-	-	-	-	-	-	-	-	deleterious(0)	probably_damaging(0.981)	27.3	deleterious(0.870)	D	0.91382	0.427038	D	0.92847	0.9735	0.90819	8.94603	0.756124	0.91363	0.77279	0.74766	0.62929	D	D	0.72438	0.31546	D	0.95874	D	0.96506	Gain_of_catalytic_residue_at_S337_(P_=_0.002),_Loss_of_disorder_(P_=_0.1193),_Loss_of_loop_(P_=_0.2237),_Loss_of_helix_(P_=_0.2662),_Loss_of_stability_(P_=_0.292)	0.92015	0.93784
rs1057516929	14:94379511-94379512	CCC	frameshift_variant	ENST00000448921.5:c.1018del	ENSP00000416066.1:p.Ala340LeufsTer12	1588-1591	1015-1018	339-340	GA/GX	GGGGct/GGGct	-	-	-	-	-	-	-	-	-	likely_pathogenic	-	-	-	-	-	-	-	-	-	-	-	-	-	-	-	-	-	-	-	-	-	-	-	-	-	-	-	-	-
rs186298255	14:94379513-94379513	T	missense_variant	ENST00000448921.5:c.1016G>A	ENSP00000416066.1:p.Gly339Glu	1589	1016	339	G/E	gGg/gAg	-	-	-	-	-	-	-	-	-	-	-	tolerated(1)	benign(0.006)	0.041	neutral(0.000)	T	0.18721	-0.214714	T	0.00987	0.03837	0.44678	0.0385515	-1.76932	0.8244	0.00808	0.74766	0.03325	N	T	0.35936	0.05925	T	0.51816	T	0.5837	Gain_of_catalytic_residue_at_F336_(P_=_0.0058),_Gain_of_methylation_at_K334_(P_=_0.1071),_Gain_of_disorder_(P_=_0.1225),_Gain_of_solvent_accessibility_(P_=_0.1456),_Gain_of_glycosylation_at_S343_(P_=_0.214)	0.36047	0.04927
rs765966782	14:94379514-94379514	A	missense_variant	ENST00000448921.5:c.1015G>T	ENSP00000416066.1:p.Gly339Trp	1588	1015	339	G/W	Ggg/Tgg	-	-	-	-	-	-	-	-	-	-	-	deleterious(0.01)	possibly_damaging(0.887)	22.2	deleterious(0.752)	T	0.41677	-0.067815	D	0.41658	0.48418	0.84129	1.01619	-0.620083	0.84341	0.12034	0.42865	0.03325	N	D	0.72484	0.29064	D	0.84295	T	0.70141	Gain_of_catalytic_residue_at_F336_(P_=_0.0076),_Loss_of_disorder_(P_=_0.036),_Loss_of_methylation_at_K334_(P_=_0.0906),_Gain_of_helix_(P_=_0.1736),_Gain_of_solvent_accessibility_(P_=_0.2192)	0.35885	0.42436
rs765966782	14:94379514-94379514	T	missense_variant	ENST00000448921.5:c.1015G>A	ENSP00000416066.1:p.Gly339Arg	1588	1015	339	G/R	Ggg/Agg	-	-	-	-	-	-	-	-	-	-	-	tolerated(0.41)	benign(0.021)	10.65	neutral(0.016)	T	0.2565	-0.167267	T	0.10316	0.16303	0.47383	0.346688	-1.12906	0.83413	0.12034	0.42865	0.03325	N	D	0.52093	0.05566	T	0.65527	T	0.51162	Gain_of_catalytic_residue_at_F336_(P_=_0.0012),_Gain_of_solvent_accessibility_(P_=_0.0674),_Loss_of_ubiquitination_at_K334_(P_=_0.0839),_Loss_of_methylation_at_K334_(P_=_0.1033),_Gain_of_helix_(P_=_0.1736)	0.3849	0.13579
rs371761828	14:94379515-94379515	T	missense_variant	ENST00000448921.5:c.1014T>A	ENSP00000416066.1:p.Asn338Lys	1587	1014	338	N/K	aaT/aaA	-	-	-	-	-	-	-	-	-	likely_benign	-	tolerated(0.09)	benign(0.211)	3.583	neutral(0.317)	T	0.28148	-0.151047	T	0.1504	0.25613	0.75749	0.164918	-1.37399	0.87352	0.00829	0.74766	0.08543	N	D	0.71389	0.11272	T	0.79658	T	0.67099	Gain_of_catalytic_residue_at_N338_(P_=_0.001),_Gain_of_ubiquitination_at_N338_(P_=_0.0198),_Gain_of_methylation_at_N338_(P_=_0.0528),_Loss_of_stability_(P_=_0.0557),_Gain_of_disorder_(P_=_0.0847)	0.53552	0.35535
rs190061930	14:94379526-94379526	A	missense_variant	ENST00000448921.5:c.1003G>T	ENSP00000416066.1:p.Val335Phe	1576	1003	335	V/F	Gtc/Ttc	-	-	-	-	-	-	-	-	-	-	-	deleterious(0.01)	probably_damaging(0.987)	21.1	deleterious(0.842)	D	0.63976	0.0970837	D	0.84121	0.66904	0.81513	1.88915	-0.158335	0.85173	0.29435	0.4628	0.26281	N	D	0.75402	0.34954	D	0.90944	D	0.88873	Gain_of_catalytic_residue_at_S337_(P_=_0.0022),_Gain_of_methylation_at_K334_(P_=_0.0904),_Loss_of_ubiquitination_at_K334_(P_=_0.2335),_Loss_of_disorder_(P_=_0.3227),_Loss_of_MoRF_binding_(P_=_0.3856)	0.81093	0.87999
rs190061930	14:94379526-94379526	T	missense_variant	ENST00000448921.5:c.1003G>A	ENSP00000416066.1:p.Val335Ile	1576	1003	335	V/I	Gtc/Atc	3.977e-06	0	0	0	0	0	8.794e-06	0	0	-	-	tolerated(0.29)	benign(0.085)	7.907	neutral(0.035)	T	0.37576	-0.0930275	T	0.23847	0.25493	0.50449	0.918901	-0.68668	0.83413	0.29435	0.4628	0.26281	N	T	0.39625	0.04962	T	0.68986	T	0.61797	Gain_of_catalytic_residue_at_S337_(P_=_0),_Loss_of_methylation_at_K334_(P_=_0.0627),_Loss_of_ubiquitination_at_K334_(P_=_0.2094),_Loss_of_disorder_(P_=_0.2959),_Loss_of_helix_(P_=_0.3949)	0.53715	0.38214
rs1444508096	14:94379529-94379529	C	missense_variant	ENST00000448921.5:c.1000A>G	ENSP00000416066.1:p.Lys334Glu	1573	1000	334	K/E	Aag/Gag	-	-	-	-	-	-	-	-	-	likely_benign	-	tolerated(0.16)	benign(0.013)	10.6	neutral(0.060)	T	0.28558	-0.148436	T	0.05666	0.32358	0.45589	0.558547	-0.946054	0.87038	0.06725	0.44174	0.19482	N	D	0.57267	0.07242	T	0.72978	T	0.56614	Gain_of_catalytic_residue_at_F336_(P_=_0.0019),_Loss_of_methylation_at_K334_(P_=_0.0189),_Loss_of_ubiquitination_at_K334_(P_=_0.0362),_Gain_of_disorder_(P_=_0.2762),_Loss_of_MoRF_binding_(P_=_0.2769)	0.62655	0.1519
rs1566750632	14:94379537-94379546	CCCAG	inframe_deletion	ENST00000448921.5:c.984_992del	ENSP00000416066.1:p.Gln329_Gly331del	1552-1565	979-992	327-331	LGQLG/LG	CTGGGTCAACTGGGc/CTGGGc	3.977e-06	0	0	0	0	0	0	0.0001629	0	-	-	-	-	-	-	-	-	-	-	-	-	-	-	-	-	-	-	-	-	-	-	-	-	-	-	-	-	-	-
rs569455355	14:94379538-94379538	G	missense_variant	ENST00000448921.5:c.991G>C	ENSP00000416066.1:p.Gly331Arg	1564	991	331	G/R	Ggc/Cgc	1.989e-05	0	0	0	0	0	0	0	0.0001633	uncertain_significance	-	deleterious(0)	probably_damaging(0.999)	25	deleterious(0.935)	D	0.89067	0.38563	D	0.89818	0.97576	0.93642	6.12173	0.591763	0.96465	0.54382	0.74766	0.41335	D	D	0.79718	0.35204	D	0.9869	D	0.9871	Gain_of_MoRF_binding_(P_=_0.0165),_Gain_of_solvent_accessibility_(P_=_0.0171),_Gain_of_catalytic_residue_at_F336_(P_=_0.0198),_Gain_of_relative_solvent_accessibility_(P_=_0.0479),_Loss_of_methylation_at_K334_(P_=_0.053)	0.92228	0.97867
rs569455355	14:94379538-94379538	T	missense_variant	ENST00000448921.5:c.991G>A	ENSP00000416066.1:p.Gly331Ser	1564	991	331	G/S	Ggc/Agc	1.591e-05	0	0	0	0	0	0	0	0.0001307	-	-	deleterious(0)	probably_damaging(0.991)	24.9	deleterious(0.889)	D	0.87352	0.36123	D	0.76648	0.81914	0.93402	5.67448	0.55243	0.96434	0.54382	0.74766	0.41335	D	D	0.77198	0.32188	D	0.98362	D	0.98957	Gain_of_catalytic_residue_at_K334_(P_=_0.0062),_Loss_of_methylation_at_K334_(P_=_0.1019),_Loss_of_ubiquitination_at_K334_(P_=_0.2335),_Gain_of_MoRF_binding_(P_=_0.3399),_Gain_of_disorder_(P_=_0.3865)	0.94965	0.95877
rs1448114509	14:94379541-94379541	A	frameshift_variant	ENST00000448921.5:c.987_988insT	ENSP00000416066.1:p.Leu330SerfsTer5	1560-1561	987-988	329-330	-/X	-/T	-	-	-	-	-	-	-	-	-	-	-	-	-	22.1	-	-	-	-	-	-	-	-	-	-	-	-	-	-	-	-	-	-	-	-	-	-	-	-	-
rs1294575442	14:94379543-94379546	-	inframe_deletion	ENST00000448921.5:c.983_985del	ENSP00000416066.1:p.Gly328_Gln329delinsGlu	1556-1558	983-985	328-329	GQ/E	gGTCaa/gaa	-	-	-	-	-	-	-	-	-	-	-	-	-	4.831	-	-	-	-	-	-	-	-	-	-	-	-	-	-	-	-	-	-	-	-	-	-	-	-	-
rs369788393	14:94379546-94379546	G	missense_variant	ENST00000448921.5:c.983G>C	ENSP00000416066.1:p.Gly328Ala	1556	983	328	G/A	gGt/gCt	-	-	-	-	-	-	-	-	-	-	-	tolerated(0.49)	benign(0.003)	3.966	neutral(0.011)	T	0.33295	-0.118954	T	0.00224	0.00258	0.45846	0.291057	-1.19038	0.83495	0.21769	0.43304	0.0678	N	D	0.52093	0.05146	T	0.6846	T	0.48995	Gain_of_catalytic_residue_at_K324_(P_=_0.062),_Gain_of_ubiquitination_at_K324_(P_=_0.2382),_Loss_of_stability_(P_=_0.3511),_Gain_of_MoRF_binding_(P_=_0.3533),_Loss_of_helix_(P_=_0.3949)	0.44052	0.16971
rs1226646910	14:94379548-94379548	TA	frameshift_variant	ENST00000448921.5:c.980_981insTA	ENSP00000416066.1:p.Gly328ArgfsTer25	1553-1554	980-981	327	L/LX	ctg/ctTAg	-	-	-	-	-	-	-	-	-	-	-	-	-	25.4	-	-	-	-	-	-	-	-	-	-	-	-	-	-	-	-	-	-	-	-	-	-	-	-	-
rs1219370932	14:94379550-94379550	GGG	frameshift_variant	ENST00000448921.5:c.979_980insC	ENSP00000416066.1:p.Leu327ProfsTer8	1551-1552	978-979	326-327	VL/VPX	gtCCtg/gtCCCtg	-	-	-	-	-	-	-	-	-	-	-	-	-	26	-	-	-	-	-	-	-	-	-	-	-	-	-	-	-	-	-	-	-	-	-	-	-	-	-
rs139964603	14:94379553-94379553	T	missense_variant	ENST00000448921.5:c.976G>A	ENSP00000416066.1:p.Val326Ile	1549	976	326	V/I	Gtc/Atc	0.0003301	0.00283	0.0003469	0	0.0001087	0	0.0001759	0.0003257	3.266e-05	likely_benign,uncertain_significance	-	tolerated(1)	benign(0.009)	0.003	neutral(0.001)	T	0.26125	-0.164139	T	0.00524	0.01256	0.44988	0.0425928	-1.74523	0.84919	0.00171	0.74766	0.08827	N	D	0.57885	0.04555	T	0.61131	T	0.5212	-	-	0.13579
rs764238790	14:94379554-94379554	T	missense_variant	ENST00000448921.5:c.975C>A	ENSP00000416066.1:p.Ser325Arg	1548	975	325	S/R	agC/agA	-	-	-	-	-	-	-	-	-	-	-	tolerated(0.45)	benign(0.009)	0.006	neutral(0.013)	T	0.36516	-0.0994476	T	0.05887	0.07902	0.55823	0.0296478	-1.83045	0.88377	0.00379	0.74766	0.01437	N	D	0.7566	0.05242	T	0.77055	T	0.62426	Gain_of_catalytic_residue_at_K324_(P_=_0.0026),_Gain_of_MoRF_binding_(P_=_0.0376),_Loss_of_ubiquitination_at_K324_(P_=_0.0896),_Gain_of_solvent_accessibility_(P_=_0.1185),_Gain_of_helix_(P_=_0.1736)	0.63102	0.39704
rs1802962	14:94379556-94379556	A	missense_variant	ENST00000448921.5:c.973A>T	ENSP00000416066.1:p.Ser325Cys	1546	973	325	S/C	Agc/Tgc	-	-	-	-	-	-	-	-	-	-	-	deleterious(0.04)	possibly_damaging(0.457)	14.58	deleterious(0.499)	T	0.5023	-0.0102529	D	0.46262	0.32833	0.86871	0.520574	-0.975054	0.88767	0.01731	0.74766	0.01437	N	D	0.74358	0.12654	D	0.88302	T	0.80259	Gain_of_catalytic_residue_at_K324_(P_=_0.001),_Gain_of_methylation_at_K324_(P_=_0.0235),_Loss_of_ubiquitination_at_K324_(P_=_0.2744),_Loss_of_disorder_(P_=_0.2861),_Loss_of_sheet_(P_=_0.3635)	0.62655	0.76484
rs190881649	14:94379563-94379563	T	missense_variant	ENST00000448921.5:c.966T>A	ENSP00000416066.1:p.Asp322Glu	1539	966	322	D/E	gaT/gaA	-	-	-	-	-	-	-	-	-	-	-	deleterious(0.05)	benign(0.159)	12.96	neutral(0.359)	T	0.38135	-0.0896469	T	0.14916	0.2667	0.77201	0.572385	-0.935636	0.89071	0.07747	0.43792	0.17782	N	D	0.60298	0.05517	D	0.82825	T	0.72181	Gain_of_catalytic_residue_at_T318_(P_=_0.0032),_Gain_of_ubiquitination_at_K324_(P_=_0.2584),_Loss_of_sheet_(P_=_0.302),_Gain_of_disorder_(P_=_0.3878),_Gain_of_solvent_accessibility_(P_=_0.4067)	0.65577	0.36832
rs55704149	14:94379565-94379565	A	missense_variant	ENST00000448921.5:c.964G>T	ENSP00000416066.1:p.Asp322Tyr	1537	964	322	D/Y	Gat/Tat	-	-	-	-	-	-	-	-	-	-	-	deleterious(0)	probably_damaging(0.984)	21.5	deleterious(0.875)	D	0.70314	0.161237	D	0.57664	0.41169	0.87118	1.16715	-0.521704	0.90147	0.12724	0.42595	0.17782	N	D	0.64792	0.3381	D	0.94603	D	0.86348	Gain_of_catalytic_residue_at_T318_(P_=_0.001),_Gain_of_helix_(P_=_0.1736),_Loss_of_sheet_(P_=_0.1907),_Loss_of_loop_(P_=_0.2237),_Gain_of_ubiquitination_at_K324_(P_=_0.2584)	0.75106	0.9207
rs55704149	14:94379565-94379565	T	missense_variant	ENST00000448921.5:c.964G>A	ENSP00000416066.1:p.Asp322Asn	1537	964	322	D/N	Gat/Aat	-	-	-	-	-	-	-	-	-	-	-	tolerated(0.13)	benign(0.116)	12.5	neutral(0.262)	T	0.23242	-0.183316	T	0.1484	0.37071	0.77113	0.449781	-1.03228	0.88767	0.12724	0.42595	0.17782	N	D	0.59915	0.05106	D	0.82694	T	0.69334	Gain_of_catalytic_residue_at_T318_(P_=_0.0026),_Loss_of_ubiquitination_at_K324_(P_=_0.1866),_Gain_of_MoRF_binding_(P_=_0.1877),_Loss_of_helix_(P_=_0.2662),_Loss_of_sheet_(P_=_0.302)	0.69023	0.53105
rs774775536	14:94379567-94379567	C	missense_variant	ENST00000448921.5:c.962A>G	ENSP00000416066.1:p.Tyr321Cys	1535	962	321	Y/C	tAt/tGt	-	-	-	-	-	-	-	-	-	-	30223862	deleterious(0)	possibly_damaging(0.838)	25.6	deleterious(0.764)	D	0.73023	0.190645	D	0.91478	0.76326	0.85491	2.8947	0.137753	0.85393	0.49153	0.50053	0.17737	N	D	0.70199	0.35439	D	0.91745	D	0.8556	Gain_of_catalytic_residue_at_K324_(P_=_0),_Gain_of_ubiquitination_at_K324_(P_=_0.1278),_Loss_of_phosphorylation_at_S316_(P_=_0.2971),_Loss_of_sheet_(P_=_0.302),_Loss_of_disorder_(P_=_0.3398)	0.90231	0.87515
rs746155701	14:94379571-94379571	C	missense_variant	ENST00000448921.5:c.958A>G	ENSP00000416066.1:p.Thr320Ala	1531	958	320	T/A	Acc/Gcc	3.978e-06	6.155e-05	0	0	0	0	0	0	0	-	-	deleterious(0.04)	benign(0.358)	21.4	neutral(0.462)	T	0.53579	0.0140741	T	0.31244	0.48491	0.77602	1.88949	-0.1582	0.84047	0.77279	0.74766	0.30785	N	D	0.69315	0.07103	D	0.85574	D	0.86069	Gain_of_catalytic_residue_at_T320_(P_=_0.001),_Loss_of_ubiquitination_at_K324_(P_=_0.2744),_Loss_of_disorder_(P_=_0.2977),_Gain_of_phosphorylation_at_S316_(P_=_0.298),_Loss_of_sheet_(P_=_0.302)	0.51925	0.68882
rs796985046	14:94379577-94379577	A	missense_variant	ENST00000448921.5:c.952A>T	ENSP00000416066.1:p.Thr318Ser	1525	952	318	T/S	Act/Tct	-	-	-	-	-	-	-	-	-	-	-	tolerated(1)	benign(0)	10.59	neutral(0.000)	T	0.19622	-0.208285	T	0.08148	0.11449	0.4551	0.475753	-1.01069	0.86283	0.49319	0.50053	0.29198	N	D	0.49457	0.04428	T	0.52598	T	0.53827	Gain_of_catalytic_residue_at_L315_(P_=_0.0095),_Gain_of_disorder_(P_=_0.0559),_Gain_of_phosphorylation_at_S316_(P_=_0.1193),_Gain_of_glycosylation_at_T318_(P_=_0.1215),_Loss_of_stability_(P_=_0.1623)	0.59911	0.00137
rs1164159907	14:94379580-94379580	C	missense_variant	ENST00000448921.5:c.949A>G	ENSP00000416066.1:p.Ile317Val	1522	949	317	I/V	Att/Gtt	3.978e-06	0	0	0	0	0	0	0	3.266e-05	-	-	tolerated(0.12)	benign(0.26)	19.73	neutral(0.288)	T	0.54175	0.0184829	T	0.28292	0.35125	0.54606	1.71631	-0.229712	0.85091	0.49486	0.74766	0.51296	D	D	0.60164	0.26902	D	0.82887	D	0.84738	Gain_of_catalytic_residue_at_K314_(P_=_0.0031),_Gain_of_disorder_(P_=_0.1926),_Loss_of_methylation_at_K314_(P_=_0.2264),_Loss_of_ubiquitination_at_K314_(P_=_0.2744),_Loss_of_phosphorylation_at_S316_(P_=_0.2983)	0.86192	0.59869
rs1164159907	14:94379580-94379580	G	missense_variant	ENST00000448921.5:c.949A>C	ENSP00000416066.1:p.Ile317Leu	1522	949	317	I/L	Att/Ctt	-	-	-	-	-	-	-	-	-	-	-	tolerated(0.05)	benign(0.248)	22.1	neutral(0.370)	T	0.52573	0.00669748	T	0.31483	0.33399	0.62719	1.50306	-0.330271	0.8397	0.49486	0.74766	0.51296	D	D	0.67514	0.11348	D	0.82105	T	0.81028	Gain_of_catalytic_residue_at_K314_(P_=_0.0019),_Loss_of_methylation_at_K314_(P_=_0.0787),_Gain_of_disorder_(P_=_0.0852),_Gain_of_glycosylation_at_P313_(P_=_0.2576),_Gain_of_ubiquitination_at_K314_(P_=_0.2584)	0.89447	0.35607
rs35624994	14:94379581-94379581	GGG	frameshift_variant	ENST00000448921.5:c.948_949insC	ENSP00000416066.1:p.Ile317HisfsTer6	1520-1521	947-948	316	S/SX	tCC/tCCC	-	-	-	-	-	-	-	-	-	-	-	-	-	-	-	-	-	-	-	-	-	-	-	-	-	-	-	-	-	-	-	-	-	-	-	-	-	-	-
rs756246391	14:94379583-94379583	T	missense_variant	ENST00000448921.5:c.946T>A	ENSP00000416066.1:p.Ser316Thr	1519	946	316	S/T	Tcc/Acc	3.978e-06	0	0	0	0	0	8.798e-06	0	0	-	-	tolerated(0.1)	benign(0.017)	13.93	neutral(0.287)	T	0.46282	-0.0377592	T	0.06336	0.05568	0.77819	0.449233	-1.03275	0.84267	0.22686	0.43459	0.31903	N	D	0.6361	0.05439	T	0.7886	T	0.71103	Gain_of_catalytic_residue_at_T318_(P_=_0.0025),_Loss_of_disorder_(P_=_0.101),_Loss_of_phosphorylation_at_S316_(P_=_0.2399),_Loss_of_ubiquitination_at_K314_(P_=_0.2413),_Loss_of_sheet_(P_=_0.302)	0.86018	0.49092
rs779938258	14:94379592-94379592	A	missense_variant	ENST00000448921.5:c.937C>T	ENSP00000416066.1:p.Pro313Ser	1510	937	313	P/S	Ccc/Tcc	3.979e-06	0	0	0	0	0	8.801e-06	0	0	-	31307431	deleterious(0)	probably_damaging(0.999)	25.9	deleterious(0.935)	D	0.96022	0.556044	D	0.98932	0.93368	0.94468	9.00903	0.758716	0.98748	0.77279	0.74766	0.62929	D	D	0.85587	0.32711	D	0.99479	D	0.97804	Gain_of_catalytic_residue_at_K314_(P_=_0.0013),_Loss_of_stability_(P_=_0.0445),_Gain_of_disorder_(P_=_0.0688),_Loss_of_glycosylation_at_P313_(P_=_0.1413),_Gain_of_phosphorylation_at_S309_(P_=_0.1603)	0.94167	0.98735
rs749389616	14:94379593-94379593	A	missense_variant	ENST00000448921.5:c.936A>T	ENSP00000416066.1:p.Leu312Phe	1509	936	312	L/F	ttA/ttT	3.979e-06	0	0	0	0	0	0	0	3.266e-05	-	-	tolerated(1)	benign(0.091)	0.98	neutral(0.006)	T	0.40386	-0.0758606	T	0.04764	0.06291	0.62093	0.021577	-1.90118	0.92884	0.01521	0.74766	0.19064	N	D	0.71215	0.06755	T	0.77348	T	0.70044	Gain_of_catalytic_residue_at_K314_(P_=_0.0042),_Loss_of_disorder_(P_=_0.1391),_Loss_of_phosphorylation_at_S309_(P_=_0.1735),_Loss_of_ubiquitination_at_K314_(P_=_0.2311),_Loss_of_glycosylation_at_P313_(P_=_0.2669)	0.78744	0.15399
rs771862730	14:94379598-94379598	A	missense_variant	ENST00000448921.5:c.931C>T	ENSP00000416066.1:p.His311Tyr	1504	931	311	H/Y	Cat/Tat	-	-	-	-	-	-	-	-	-	-	-	tolerated(0.6)	benign(0.021)	0.221	neutral(0.005)	T	0.20232	-0.20398	T	0.27886	0.05258	0.49658	0.0220818	-1.8961	0.83578	0.00487	0.74766	0.04009	N	D	0.53799	0.05701	T	0.58007	T	0.51648	Gain_of_catalytic_residue_at_L315_(P_=_0.0072),_Loss_of_disorder_(P_=_0.0512),_Loss_of_methylation_at_K314_(P_=_0.1181),_Loss_of_ubiquitination_at_K314_(P_=_0.2014),_Gain_of_phosphorylation_at_S309_(P_=_0.2462)	0.57084	0.02942
rs773222881	14:94379603-94379603	T	missense_variant	ENST00000448921.5:c.926G>A	ENSP00000416066.1:p.Ser309Asn	1499	926	309	S/N	aGc/aAc	0.0002786	0	0.001966	0	0	0	0	0	6.533e-05	likely_benign,uncertain_significance	-	tolerated(1)	benign(0)	0.001	neutral(0.000)	T	0.12817	-0.260713	T	0.07212	0.04262	0.44425	0.0301803	-1.82637	0.84267	0.01808	0.74766	0.05816	N	D	0.54467	0.04561	T	0.51261	T	0.54665	Gain_of_catalytic_residue_at_L312_(P_=_0.0023),_Loss_of_phosphorylation_at_S309_(P_=_0.0407),_Loss_of_disorder_(P_=_0.0917),_Loss_of_methylation_at_K314_(P_=_0.2052),_Loss_of_ubiquitination_at_K314_(P_=_0.2113)	0.41921	0.01178
rs1440243479	14:94379606-94379606	A	missense_variant	ENST00000448921.5:c.923C>T	ENSP00000416066.1:p.Ala308Val	1496	923	308	A/V	gCc/gTc	-	-	-	-	-	-	-	-	-	-	-	tolerated(0.71)	benign(0.003)	7.129	neutral(0.002)	T	0.24926	-0.172034	T	0.06808	0.04625	0.45992	0.0468132	-1.72204	0.84773	0.03298	0.50053	0.04899	N	D	0.67081	0.04821	T	0.53661	T	0.54973	Gain_of_catalytic_residue_at_L312_(P_=_0.001),_Loss_of_disorder_(P_=_0.0794),_Gain_of_sheet_(P_=_0.1539),_Loss_of_phosphorylation_at_S309_(P_=_0.2034),_Gain_of_loop_(P_=_0.3485)	0.34423	0.01097
rs141620200	14:94379607-94379607	A	missense_variant	ENST00000448921.5:c.922G>T	ENSP00000416066.1:p.Ala308Ser	1495	922	308	A/S	Gcc/Tcc	0.002014	0.0006162	8.674e-05	0.0008941	0	0.002079	0.003743	0.002281	0	uncertain_significance,conflicting_interpretations_of_pathogenicity,benign/likely_benign	30223862,29761417	deleterious(0.02)	benign(0.076)	16.64	neutral(0.389)	T	0.04526	-0.353256	T	0.00252	0.26756	0.61326	1.14133	-0.537995	0.87671	0.38486	0.48965	0.04899	N	D	0.55945	0.06507	D	0.85136	T	0.7066	-	-	0.72935
rs141620200	14:94379607-94379607	T	missense_variant	ENST00000448921.5:c.922G>A	ENSP00000416066.1:p.Ala308Thr	1495	922	308	A/T	Gcc/Acc	-	-	-	-	-	-	-	-	-	-	30223862,29761417	tolerated(0.11)	benign(0.091)	14.71	neutral(0.278)	T	0.39599	-0.0807081	T	0.14765	0.44568	0.55444	1.14452	-0.535965	0.87272	0.38486	0.48965	0.04899	N	D	0.51865	0.10332	D	0.83261	T	0.70361	Gain_of_catalytic_residue_at_L312_(P_=_9e-04),_Gain_of_phosphorylation_at_A308_(P_=_0.0266),_Gain_of_disorder_(P_=_0.0984),_Loss_of_stability_(P_=_0.2922),_Gain_of_glycosylation_at_A308_(P_=_0.2993)	0.41266	0.43825
rs759132932	14:94379611-94379611	A	missense_variant,splice_region_variant	ENST00000448921.5:c.918G>T	ENSP00000416066.1:p.Arg306Ser	1491	918	306	R/S	agG/agT	3.981e-06	0	0	0	0	0	8.809e-06	0	0	-	-	tolerated(0.17)	benign(0.175)	3.66	neutral(0.075)	T	0.30492	-0.136225	T	0.13812	0.09099	0.7701	0.13371	-1.43718	0.83737	0.03178	0.51787	0.08307	N	D	0.493	0.06061	T	0.65782	T	0.52633	Gain_of_catalytic_residue_at_R305_(P_=_0.0153),_Gain_of_phosphorylation_at_R306_(P_=_0.0311),_Gain_of_disorder_(P_=_0.078),_Loss_of_stability_(P_=_0.111),_Loss_of_solvent_accessibility_(P_=_0.2106)	0.58507	0.23649
rs764950047	14:94379612-94379612	A	splice_acceptor_variant	ENST00000448921.5:c.918-1G>T	-	-	-	-	-	-	3.982e-06	0	0	0	0	0	0	0	3.267e-05	-	-	-	-	33	-	-	-	-	-	-	-	-	-	-	-	-	-	-	-	-	-	-	-	-	-	-	-	-	-
rs764950047	14:94379612-94379612	T	splice_acceptor_variant	ENST00000448921.5:c.918-1G>A	-	-	-	-	-	-	-	-	-	-	-	-	-	-	-	-	-	-	-	32	-	-	-	-	-	-	-	-	-	-	-	-	-	-	-	-	-	-	-	-	-	-	-	-	-
rs750779440	14:94380870-94380870	T	splice_donor_variant	ENST00000448921.5:c.917+1G>A	-	-	-	-	-	-	3.979e-06	0	0	0	0	0	0	0	3.266e-05	-	30223862	-	-	31	-	-	-	-	-	-	-	-	-	-	-	-	-	-	-	-	-	-	-	-	-	-	-	-	-
rs748777702	14:94380871-94380874	CT	inframe_deletion,splice_region_variant	ENST00000448921.5:c.915_917del	ENSP00000416066.1:p.Arg306del	1486-1490	913-917	305-306	RR/R	AGAAGg/AGg	3.979e-06	0	2.891e-05	0	0	0	0	0	0	-	-	-	-	22.7	-	-	-	-	-	-	-	-	-	-	-	-	-	-	-	-	-	-	-	-	-	-	-	-	-
rs749021630	14:94380878-94380878	T	missense_variant	ENST00000448921.5:c.910G>A	ENSP00000416066.1:p.Asp304Asn	1483	910	304	D/N	Gac/Aac	3.978e-06	0	0	0	0	0	8.796e-06	0	0	-	-	tolerated(0.47)	benign(0)	0.004	neutral(0.011)	T	0.14034	-0.250514	T	0.06931	0.05879	0.43584	0.002073	-2.36577	0.83737	0.00551	0.74766	0.00387	N	D	0.66745	0.04699	T	0.63844	T	0.54879	Gain_of_catalytic_residue_at_L300_(P_=_0.0205),_Loss_of_phosphorylation_at_S307_(P_=_0.1275),_Loss_of_stability_(P_=_0.1525),_Loss_of_disorder_(P_=_0.2219),_Gain_of_methylation_at_R306_(P_=_0.2626)	0.41757	0.09627
rs1566753060	14:94380880-94380880	C	missense_variant	ENST00000448921.5:c.908A>G	ENSP00000416066.1:p.Glu303Gly	1481	908	303	E/G	gAa/gGa	-	-	-	-	-	-	-	-	-	-	-	tolerated(0.5)	benign(0.01)	5.718	neutral(0.011)	T	0.28072	-0.151523	T	0.04333	0.11638	0.54147	0.127652	-1.45084	0.87352	0.03423	0.74766	0.02966	N	D	0.63706	0.05384	T	0.72483	T	0.55834	Gain_of_catalytic_residue_at_L300_(P_=_0.0118),_Loss_of_stability_(P_=_0.0572),_Gain_of_ubiquitination_at_K298_(P_=_0.0804),_Loss_of_disorder_(P_=_0.0932),_Loss_of_helix_(P_=_0.1299)	0.6175	0.08516
rs1802963	14:94380881-94380881	G	missense_variant	ENST00000448921.5:c.907G>C	ENSP00000416066.1:p.Glu303Gln	1480	907	303	E/Q	Gaa/Caa	-	-	-	-	-	-	-	-	-	likely_benign	25425243	tolerated(0.66)	benign(0.015)	2.824	neutral(0.003)	T	0.35785	-0.103861	T	0.01234	0.04009	0.446	0.235676	-1.2611	0.87272	0.1964	0.50053	0.02966	N	D	0.57148	0.04785	T	0.73024	T	0.59634	Gain_of_catalytic_residue_at_L300_(P_=_0.0199),_Loss_of_ubiquitination_at_K298_(P_=_0.0949),_Loss_of_disorder_(P_=_0.1046),_Loss_of_phosphorylation_at_S307_(P_=_0.1353),_Gain_of_helix_(P_=_0.2294)	0.47336	0.04745
rs377668175	14:94380883-94380883	A	missense_variant	ENST00000448921.5:c.905A>T	ENSP00000416066.1:p.Asn302Ile	1478	905	302	N/I	aAt/aTt	1.591e-05	0	0	0	0	0	3.518e-05	0	0	-	-	tolerated(0.32)	benign(0.035)	5.282	neutral(0.026)	T	0.22864	-0.185883	T	0.16797	0.0218	0.7674	0.11417	-1.48331	0.84842	0.05599	0.51787	0.04146	N	D	0.70409	0.08408	T	0.791	T	0.60236	-	-	0.55503
rs550592374	14:94380889-94380889	C	missense_variant	ENST00000448921.5:c.899T>G	ENSP00000416066.1:p.Leu300Arg	1472	899	300	L/R	cTg/cGg	0.0002307	0	0	0	0.003153	0	0	0	0	uncertain_significance,likely_benign	-	tolerated(0.08)	benign(0.035)	16.68	neutral(0.302)	T	0.17814	-0.221323	T	0.08568	0.03905	0.61269	0.9321	-0.677559	0.84919	0.41111	0.74766	0.08809	N	T	0.47904	0.11777	T	0.77821	T	0.63035	Gain_of_disorder_(P_=_0.0155),_Gain_of_ubiquitination_at_K298_(P_=_0.0458),_Loss_of_stability_(P_=_0.0752),_Gain_of_relative_solvent_accessibility_(P_=_0.1259),_Gain_of_phosphorylation_at_T297_(P_=_0.1281)	0.71863	0.36767
rs550592374	14:94380889-94380889	G	missense_variant	ENST00000448921.5:c.899T>C	ENSP00000416066.1:p.Leu300Pro	1472	899	300	L/P	cTg/cCg	4.772e-05	0	0	0	0.0006524	0	0	0	0	-	-	deleterious(0.03)	possibly_damaging(0.896)	23.2	deleterious(0.718)	T	0.42817	-0.0605843	T	0.24303	0.44953	0.81449	1.70104	-0.236432	0.85247	0.41111	0.74766	0.08809	N	D	0.67421	0.35948	D	0.89139	T	0.77026	Gain_of_disorder_(P_=_0.0129),_Gain_of_glycosylation_at_T297_(P_=_0.0294),_Loss_of_stability_(P_=_0.0325),_Gain_of_ubiquitination_at_K298_(P_=_0.0577),_Gain_of_catalytic_residue_at_R305_(P_=_0.1044)	0.80994	0.8338
rs778905943	14:94380893-94380893	G	missense_variant	ENST00000448921.5:c.895T>C	ENSP00000416066.1:p.Phe299Leu	1468	895	299	F/L	Ttc/Ctc	3.977e-06	0	2.891e-05	0	0	0	0	0	0	-	-	tolerated(0.51)	benign(0.003)	2.896	neutral(0.009)	T	0.22504	-0.188331	T	0.07515	0.07129	0.79301	0.345474	-1.13032	0.83241	0.10461	0.48965	0.2368	N	T	0.43652	0.05466	T	0.61083	T	0.48125	Gain_of_catalytic_residue_at_L300_(P_=_0.0192),_Loss_of_methylation_at_K298_(P_=_0.0788),_Gain_of_disorder_(P_=_0.0958),_Gain_of_ubiquitination_at_K298_(P_=_0.1062),_Gain_of_helix_(P_=_0.1736)	0.6068	0.08473
rs957169128	14:94380894-94380894	A	missense_variant	ENST00000448921.5:c.894G>T	ENSP00000416066.1:p.Lys298Asn	1467	894	298	K/N	aaG/aaT	-	-	-	-	-	-	-	-	-	likely_benign	-	tolerated(0.28)	benign(0.045)	4.862	neutral(0.034)	T	0.29474	-0.142628	T	0.0516	0.20903	0.60206	0.50968	-0.98352	0.84487	0.247	0.51787	0.12863	N	D	0.58727	0.06076	T	0.77238	T	0.65661	Loss_of_methylation_at_K298_(P_=_0.0015),_Gain_of_catalytic_residue_at_D294_(P_=_0.0032),_Loss_of_ubiquitination_at_K298_(P_=_0.0218),_Loss_of_glycosylation_at_K298_(P_=_0.1496),_Loss_of_disorder_(P_=_0.2204)	0.73695	0.68372
rs752776707	14:94380898-94380898	A	missense_variant	ENST00000448921.5:c.890C>T	ENSP00000416066.1:p.Thr297Ile	1463	890	297	T/I	aCc/aTc	-	-	-	-	-	-	-	-	-	-	-	tolerated(0.09)	benign(0.01)	1.421	neutral(0.297)	T	0.3425	-0.113138	T	0.07343	0.09589	0.61795	0.298291	-1.18191	0.84341	0.06852	0.51787	0.0197	N	D	0.6669	0.05259	T	0.69418	T	0.56742	Gain_of_catalytic_residue_at_L300_(P_=_0.0044),_Gain_of_ubiquitination_at_K298_(P_=_0.0725),_Loss_of_disorder_(P_=_0.0786),_Loss_of_helix_(P_=_0.1706),_Gain_of_loop_(P_=_0.3485)	0.56926	0.20218
rs752776707	14:94380898-94380898	T	missense_variant	ENST00000448921.5:c.890C>A	ENSP00000416066.1:p.Thr297Asn	1463	890	297	T/N	aCc/aAc	7.953e-06	0	0	0	0	0	1.758e-05	0	0	uncertain_significance	-	tolerated(0.33)	benign(0.003)	0.322	neutral(0.024)	T	0.17955	-0.220273	T	0.06056	0.05951	0.51444	0.270666	-1.21508	0.83413	0.06852	0.51787	0.0197	N	D	0.6456	0.05334	T	0.63791	T	0.50687	Gain_of_catalytic_residue_at_L300_(P_=_0.0222),_Loss_of_ubiquitination_at_K298_(P_=_0.0768),_Gain_of_disorder_(P_=_0.1715),_Loss_of_helix_(P_=_0.3949),_Loss_of_glycosylation_at_T297_(P_=_0.4157)	0.53228	0.1891
rs1377928604	14:94380899-94380902	TGAT	inframe_deletion	ENST00000448921.5:c.887_889del	ENSP00000416066.1:p.Ile296del	1456-1462	883-889	295-297	IIT/IT	ATCATCAcc/ATCAcc	-	-	-	-	-	-	-	-	-	-	-	-	-	9.202	-	-	-	-	-	-	-	-	-	-	-	-	-	-	-	-	-	-	-	-	-	-	-	-	-
rs1449547720	14:94380904-94380904	C	missense_variant	ENST00000448921.5:c.884T>G	ENSP00000416066.1:p.Ile295Ser	1457	884	295	I/S	aTc/aGc	-	-	-	-	-	-	-	-	-	-	-	tolerated(0.41)	benign(0.085)	2.819	neutral(0.021)	T	0.37379	-0.0942172	T	0.0563	0.08964	0.53535	0.299654	-1.18036	0.83157	0.05941	0.51787	0.03641	N	D	0.64763	0.06573	T	0.68246	T	0.49122	Gain_of_disorder_(P_=_0.0064),_Gain_of_catalytic_residue_at_E290_(P_=_0.0149),_Gain_of_ubiquitination_at_K298_(P_=_0.0548),_Loss_of_stability_(P_=_0.0668),_Gain_of_phosphorylation_at_I295_(P_=_0.0805)	0.7568	0.33002
rs772436715	14:94380908-94380908	T	missense_variant	ENST00000448921.5:c.880G>A	ENSP00000416066.1:p.Asp294Asn	1453	880	294	D/N	Gat/Aat	1.193e-05	0	0	0	0	0	1.758e-05	0	3.266e-05	uncertain_significance	-	deleterious(0.02)	benign(0.065)	15.16	neutral(0.388)	T	0.15236	-0.240875	T	0.04824	0.28474	0.58341	0.358485	-1.11701	0.84195	0.11504	0.48965	0.02996	N	D	0.71089	0.0667	T	0.8023	T	0.61656	-	-	0.54746
rs141095970	14:94380909-94380909	C	missense_variant	ENST00000448921.5:c.879C>G	ENSP00000416066.1:p.His293Gln	1452	879	293	H/Q	caC/caG	-	-	-	-	-	-	-	-	-	likely_benign	30223862	tolerated(0.31)	benign(0)	1.947	neutral(0.027)	T	0.1876	-0.214425	T	0.13086	0.02549	0.43712	0.0226143	-1.89089	0.8366	0.0741	0.51787	0.03914	N	T	0.41369	0.04814	T	0.63469	T	0.44858	Gain_of_catalytic_residue_at_E288_(P_=_0.0177),_Loss_of_ubiquitination_at_K298_(P_=_0.0702),_Loss_of_disorder_(P_=_0.1632),_Gain_of_helix_(P_=_0.2059),_Gain_of_relative_solvent_accessibility_(P_=_0.2363)	0.53715	0.02294
rs141095970	14:94380909-94380909	T	missense_variant	ENST00000448921.5:c.879C>A	ENSP00000416066.1:p.His293Gln	1452	879	293	H/Q	caC/caA	0.0001432	0.00203	2.891e-05	0	0	0	8.792e-06	0.0001629	0	uncertain_significance	30223862	tolerated(0.31)	benign(0)	1.847	neutral(0.027)	T	0.00367	-0.533424	T	0.01817	0.02352	0.43712	0.0226143	-1.89089	0.8366	0.0741	0.51787	0.03914	N	T	0.4493	0.04814	T	0.55947	T	0.42282	-	-	0.02294
rs1281598461	14:94380910-94380910	C	missense_variant	ENST00000448921.5:c.878A>G	ENSP00000416066.1:p.His293Arg	1451	878	293	H/R	cAc/cGc	7.953e-06	0	0	0	0	0	1.758e-05	0	0	likely_benign	-	tolerated(0.15)	benign(0)	6.113	neutral(0.241)	T	0.23127	-0.184111	T	0.10052	0.01659	0.43712	0.046644	-1.72296	0.83737	0.00836	0.74766	0.03914	N	D	0.65	0.05541	T	0.55947	T	0.4908	Gain_of_helix_(P_=_0.0854),_Gain_of_catalytic_residue_at_E288_(P_=_0.0879),_Loss_of_disorder_(P_=_0.1143),_Gain_of_ubiquitination_at_K298_(P_=_0.123),_Gain_of_solvent_accessibility_(P_=_0.1319)	0.58821	0.01514
rs745624643	14:94380913-94380913	A	missense_variant	ENST00000448921.5:c.875C>T	ENSP00000416066.1:p.Thr292Ile	1448	875	292	T/I	aCc/aTc	4.772e-05	0	0	0	0	0	0.0001055	0	0	uncertain_significance	-	deleterious(0.05)	benign(0.141)	8.811	neutral(0.357)	T	0.49479	-0.0156006	T	0.26373	0.34064	0.85577	0.538859	-0.960963	0.89561	0.02632	0.74766	0.09387	N	D	0.80305	0.06061	D	0.90192	D	0.85109	Gain_of_catalytic_residue_at_E288_(P_=_0.003),_Loss_of_disorder_(P_=_0.0547),_Gain_of_helix_(P_=_0.0696),_Loss_of_loop_(P_=_0.0804),_Loss_of_solvent_accessibility_(P_=_0.3103)	0.90153	0.93268
rs769666780	14:94380914-94380914	C	missense_variant	ENST00000448921.5:c.874A>G	ENSP00000416066.1:p.Thr292Ala	1447	874	292	T/A	Acc/Gcc	4.374e-05	0	0	0	0	0	0	0	0.0003593	-	-	tolerated(0.19)	benign(0.009)	13.71	neutral(0.050)	T	0.12103	-0.26691	T	0.12575	0.13697	0.61793	1.09602	-0.567218	0.89145	0.60666	0.74766	0.09387	N	D	0.80722	0.05361	D	0.88471	T	0.77679	Gain_of_catalytic_residue_at_E288_(P_=_0.0042),_Loss_of_disorder_(P_=_0.1701),_Loss_of_stability_(P_=_0.1925),_Gain_of_helix_(P_=_0.2059),_Loss_of_phosphorylation_at_T297_(P_=_0.5709)	0.66424	0.87515
rs1443274556	14:94380917-94380917	A	missense_variant	ENST00000448921.5:c.871C>T	ENSP00000416066.1:p.Leu291Phe	1444	871	291	L/F	Ctc/Ttc	-	-	-	-	-	-	-	-	-	-	-	deleterious(0)	probably_damaging(0.997)	22.6	deleterious(0.911)	D	0.67831	0.134858	D	0.49462	0.7713	0.83699	1.74842	-0.215772	0.94584	0.32333	0.51787	0.28743	N	D	0.86779	0.33956	D	0.97446	D	0.92097	Gain_of_catalytic_residue_at_E288_(P_=_0.0039),_Loss_of_stability_(P_=_0.0821),_Loss_of_disorder_(P_=_0.1317),_Loss_of_helix_(P_=_0.1706),_Gain_of_loop_(P_=_0.2754)	0.88806	0.9162
rs1555368557	14:94380922-94380922	TTTTT	frameshift_variant	ENST00000448921.5:c.866_867insA	ENSP00000416066.1:p.Asn289LysfsTer2	1436-1439	863-866	288-289	EN/EKX	gAAAAt/gAAAAAt	-	-	-	-	-	-	-	-	-	pathogenic	-	-	-	22	-	-	-	-	-	-	-	-	-	-	-	-	-	-	-	-	-	-	-	-	-	-	-	-	-
rs749030711	14:94380923-94380923	G	missense_variant	ENST00000448921.5:c.865A>C	ENSP00000416066.1:p.Asn289His	1438	865	289	N/H	Aat/Cat	3.977e-06	0	0	0	0	0	0	0	3.266e-05	-	-	deleterious(0.01)	benign(0.019)	7.823	neutral(0.407)	T	0.251	-0.170875	T	0.04648	0.18963	0.60406	0.185452	-1.33771	0.88143	0.05277	0.51787	0.03758	N	D	0.67275	0.05113	D	0.84431	T	0.67925	Gain_of_catalytic_residue_at_E288_(P_=_9e-04),_Gain_of_disorder_(P_=_0.0618),_Gain_of_helix_(P_=_0.2059),_Gain_of_solvent_accessibility_(P_=_0.367),_Loss_of_stability_(P_=_0.4395)	0.37837	0.34214
rs17580	14:94380925-94380925	A	missense_variant	ENST00000448921.5:c.863A>T	ENSP00000416066.1:p.Glu288Val	1436	863	288	E/V	gAa/gTa	0.0233	0.007936	0.03012	0.01369	5.437e-05	0.008453	0.03653	0.03421	0	other,pathogenic,_other,pathogenic,risk_factor	25741868,24895604,16608528,24055113,20981092,22975760,28289587,21625484,21067581,26174136,26304913,22426792,301355,1082356,2539391,2567291,6093867,6602622,8970361,10194472,14985567,15711957,15978931,15994391,18565211,19956452,20170533,20301692,21138453,23837941,25454901,26141072,26672964,26831755,30739910,22912729,30068317,24603877,25287719,23990791,29573137,29090095,28170284,28546746,25306238,22…	deleterious(0)	probably_damaging(0.996)	32	deleterious(0.906)	T	0.25344	-0.169273	T	0.08788	0.53116	0.82754	4.06067	0.356045	0.89496	0.7114	0.74766	0.48115	D	-	-	0.32842	T	0.65616	T	0.78622	-	-	0.93875
rs1450795004	14:94380928-94380928	G	missense_variant	ENST00000448921.5:c.860T>C	ENSP00000416066.1:p.Leu287Pro	1433	860	287	L/P	cTg/cCg	3.976e-06	0	0	0	0	0	0	0	3.266e-05	-	-	deleterious(0)	probably_damaging(0.995)	25.5	deleterious(0.902)	D	0.74076	0.201964	D	0.61118	0.83047	0.90148	3.16984	0.197271	0.87038	0.46115	0.74766	0.11302	N	D	0.89071	0.37842	D	0.95502	D	0.93198	Gain_of_catalytic_residue_at_E288_(P_=_0.0013),_Gain_of_disorder_(P_=_0.0242),_Loss_of_stability_(P_=_0.0272),_Gain_of_methylation_at_K283_(P_=_0.0436),_Gain_of_ubiquitination_at_K283_(P_=_0.0455)	0.89129	0.96317
rs149537225	14:94380932-94380932	A	missense_variant	ENST00000448921.5:c.856C>T	ENSP00000416066.1:p.His286Tyr	1429	856	286	H/Y	Cac/Tac	0.0001074	0.001538	0	0	0	0	0	0.0003259	0	-	31307431	tolerated(0.11)	benign(0.031)	19.47	neutral(0.273)	T	0.02768	-0.388066	T	0.00801	0.15892	0.66677	0.785239	-0.780447	0.84047	0.37579	0.74766	0.25297	N	D	0.56112	0.06156	T	0.78118	T	0.68697	-	-	0.38927
rs1480528329	14:94380935-94380935	A	stop_gained	ENST00000448921.5:c.853C>T	ENSP00000416066.1:p.Gln285Ter	1426	853	285	Q/*	Cag/Tag	1.193e-05	0	8.673e-05	0	0	0	0	0	0	-	-	-	-	37	-	D	0.91643	0.432186	-	-	0.28933	-	1.47594	-0.344129	-	0.04	0.74766	0.12238	N	-	-	-	-	-	-	-	-	-	-
rs864622044	14:94380940-94380940	A	missense_variant	ENST00000448921.5:c.848A>T	ENSP00000416066.1:p.Lys283Ile	1421	848	283	K/I	aAa/aTa	3.976e-06	0	0	0	0	0	8.79e-06	0	0	uncertain_significance	-	deleterious(0)	probably_damaging(0.925)	24.8	deleterious(0.818)	D	0.79099	0.255366	D	0.88404	0.70025	0.78466	2.34575	-0.00393212	0.88066	0.44383	0.74766	0.51296	D	D	0.86835	0.38542	D	0.93475	D	0.93333	Gain_of_catalytic_residue_at_E288_(P_=_0.0039),_Loss_of_disorder_(P_=_0.0118),_Loss_of_methylation_at_K283_(P_=_0.0194),_Loss_of_ubiquitination_at_K283_(P_=_0.0233),_Loss_of_glycosylation_at_K283_(P_=_0.1136)	0.91726	0.83026
rs1566753359	14:94380941-94380941	A	stop_gained	ENST00000448921.5:c.847A>T	ENSP00000416066.1:p.Lys283Ter	1420	847	283	K/*	Aaa/Taa	3.976e-06	0	0	0	0	0	8.79e-06	0	0	-	-	-	-	38	-	D	0.96596	0.569311	-	-	0.49208	-	2.23901	-0.0363372	-	0.43959	0.74766	0.51296	D	-	-	-	-	-	-	-	-	-	-
rs370923940	14:94380944-94380944	T	missense_variant	ENST00000448921.5:c.844G>A	ENSP00000416066.1:p.Gly282Arg	1417	844	282	G/R	Ggg/Agg	7.953e-06	6.152e-05	0	0	0	0	8.79e-06	0	0	-	-	deleterious(0)	possibly_damaging(0.898)	23.5	deleterious(0.799)	T	0.50189	-0.0105516	D	0.66371	0.88906	0.7773	2.25145	-0.0324585	0.86077	0.67566	0.74766	0.62929	D	D	0.82324	0.35204	D	0.92293	D	0.93217	-	-	0.80766
rs760917668	14:94380947-94380947	T	missense_variant	ENST00000448921.5:c.841G>A	ENSP00000416066.1:p.Glu281Lys	1414	841	281	E/K	Gag/Aag	3.976e-06	0	2.891e-05	0	0	0	0	0	0	-	-	tolerated(0.43)	benign(0.013)	3.804	neutral(0.014)	T	0.28101	-0.151349	T	0.06374	0.15222	0.59892	0.195562	-1.32105	0.8822	0.02411	0.74766	0.08912	N	D	0.60708	0.05311	D	0.82854	T	0.56161	Gain_of_methylation_at_E281_(P_=_0.0155),_Gain_of_ubiquitination_at_E281_(P_=_0.0203),_Gain_of_catalytic_residue_at_F276_(P_=_0.044),_Loss_of_sheet_(P_=_0.1501),_Loss_of_stability_(P_=_0.173)	0.55649	0.30389
rs1555368575	14:94380947-94380949	G	frameshift_variant	ENST00000448921.5:c.839_840delinsC	ENSP00000416066.1:p.Asp280AlafsTer44	1412-1413	839-840	280	D/X	gAT/gC	-	-	-	-	-	-	-	-	-	-	-	-	-	-	-	-	-	-	-	-	-	-	-	-	-	-	-	-	-	-	-	-	-	-	-	-	-	-	-
rs1555368581	14:94380948-94380949	-	frameshift_variant	ENST00000448921.5:c.839del	ENSP00000416066.1:p.Asp280ValfsTer44	1412	839	280	D/X	gAt/gt	-	-	-	-	-	-	-	-	-	-	-	-	-	-	-	-	-	-	-	-	-	-	-	-	-	-	-	-	-	-	-	-	-	-	-	-	-	-	-
rs121912714	14:94380949-94380949	A	missense_variant	ENST00000448921.5:c.839A>T	ENSP00000416066.1:p.Asp280Val	1412	839	280	D/V	gAt/gTt	0.0004732	0	0.0005493	0.003274	0	0	0.000545	0.0004886	6.533e-05	conflicting_interpretations_of_pathogenicity,other	2696185,2240842,1504305,2606478,2787118,8364590,14767073,15744045,15949707,17906067,21474916,26321041,30060175	deleterious(0)	possibly_damaging(0.848)	23.9	deleterious(0.770)	T	0.60316	0.0656663	T	0.21489	0.42337	0.82697	2.16047	-0.0614578	0.8532	0.67566	0.74766	0.1442	N	D	0.8347	0.36384	D	0.91148	D	0.94098	-	-	0.80997
rs759736224	14:94380953-94380953	T	missense_variant	ENST00000448921.5:c.835C>A	ENSP00000416066.1:p.Pro279Thr	1408	835	279	P/T	Cct/Act	3.976e-05	0	2.891e-05	0	0	0	7.911e-05	0	0	-	-	deleterious(0.02)	probably_damaging(0.999)	26.1	deleterious(0.873)	D	0.91915	0.437808	D	0.90849	0.81563	0.94198	7.57878	0.69053	0.98279	0.67566	0.74766	0.39669	N	D	0.85592	0.3456	D	0.99195	D	0.98897	-	-	0.96317
rs1566753480	14:94380955-94380955	G	missense_variant	ENST00000448921.5:c.833T>C	ENSP00000416066.1:p.Leu278Pro	1406	833	278	L/P	cTg/cCg	-	-	-	-	-	-	-	-	-	pathogenic	-	deleterious(0)	probably_damaging(0.999)	29.1	deleterious(0.935)	D	0.93705	0.480181	D	0.93006	0.95653	0.92632	7.26379	0.672274	0.90962	0.67566	0.74766	0.22615	N	D	0.88091	0.37656	D	0.96879	D	0.9823	Gain_of_catalytic_residue_at_L278_(P_=_0),_Loss_of_stability_(P_=_0.0132),_Gain_of_disorder_(P_=_0.0239),_Gain_of_ubiquitination_at_K283_(P_=_0.0474),_Gain_of_methylation_at_K283_(P_=_0.0741)	0.89289	0.99455
rs1566753494	14:94380960-94380960	T	missense_variant	ENST00000448921.5:c.828C>A	ENSP00000416066.1:p.Phe276Leu	1401	828	276	F/L	ttC/ttA	-	-	-	-	-	-	-	-	-	-	-	tolerated(0.09)	possibly_damaging(0.796)	23.2	deleterious(0.595)	D	0.66651	0.122784	T	0.28677	0.84931	0.79779	2.034	-0.104592	0.85875	0.44525	0.74766	0.27791	N	D	0.74305	0.14312	D	0.84599	D	0.84969	Gain_of_catalytic_residue_at_A272_(P_=_0.0021),_Gain_of_sheet_(P_=_0.0827),_Gain_of_disorder_(P_=_0.2455),_Loss_of_MoRF_binding_(P_=_0.4602),_Loss_of_stability_(P_=_0.607)	0.66284	0.21119
rs1295161543	14:94380965-94380965	A	missense_variant	ENST00000448921.5:c.823A>T	ENSP00000416066.1:p.Ile275Phe	1396	823	275	I/F	Atc/Ttc	3.976e-06	0	0	0	0	0	8.79e-06	0	0	-	-	tolerated(1)	benign(0.001)	0.005	neutral(0.000)	T	0.29657	-0.141458	T	0.02549	0.0153	0.45978	0.0129844	-2.00838	0.84267	0.0033	0.74766	0.04967	N	T	0.38687	0.07056	T	0.60099	T	0.51377	Gain_of_catalytic_residue_at_A272_(P_=_5e-04),_Loss_of_sheet_(P_=_0.1501),_Loss_of_stability_(P_=_0.2617),_Loss_of_MoRF_binding_(P_=_0.396),_Gain_of_disorder_(P_=_0.4133)	0.69945	0.08109
rs752721615	14:94380968-94380968	A	missense_variant	ENST00000448921.5:c.820G>T	ENSP00000416066.1:p.Ala274Ser	1393	820	274	A/S	Gcc/Tcc	2.784e-05	0	0	0	0.0002719	0	0	0	6.533e-05	-	-	deleterious(0.02)	probably_damaging(0.96)	24.8	deleterious(0.786)	T	0.41079	-0.0715511	D	0.46913	0.84615	0.8239	4.88428	0.4685	0.84557	0.67566	0.74766	0.38793	N	D	0.68806	0.26689	D	0.90342	D	0.91689	Gain_of_catalytic_residue_at_A272_(P_=_0.0013),_Gain_of_MoRF_binding_(P_=_0.276),_Loss_of_sheet_(P_=_0.302),_Gain_of_disorder_(P_=_0.458),_Loss_of_stability_(P_=_0.6328)	0.79577	0.90591
rs752721615	14:94380968-94380968	T	missense_variant	ENST00000448921.5:c.820G>A	ENSP00000416066.1:p.Ala274Thr	1393	820	274	A/T	Gcc/Acc	1.591e-05	0	0	0	0	0	1.758e-05	0	6.533e-05	-	-	deleterious(0.01)	possibly_damaging(0.871)	25.4	deleterious(0.744)	T	0.50605	-0.00757054	D	0.54366	0.94457	0.82587	4.34056	0.397468	0.84415	0.67566	0.74766	0.38793	N	D	0.67113	0.0826	D	0.89301	D	0.90684	Gain_of_catalytic_residue_at_A272_(P_=_0.0013),_Gain_of_sheet_(P_=_0.0827),_Gain_of_phosphorylation_at_A274_(P_=_0.2006),_Gain_of_glycosylation_at_A274_(P_=_0.2954),_Gain_of_MoRF_binding_(P_=_0.2968)	0.7937	0.71248
rs1007168915	14:94380973-94380973	T	missense_variant	ENST00000448921.5:c.815C>A	ENSP00000416066.1:p.Ala272Asp	1388	815	272	A/D	gCc/gAc	-	-	-	-	-	-	-	-	-	-	-	deleterious(0)	probably_damaging(0.924)	22.8	deleterious(0.818)	D	0.68455	0.141368	D	0.65684	0.80522	0.77549	1.70405	-0.235098	0.84701	0.27189	0.74766	0.25016	N	D	0.70763	0.37518	D	0.8705	D	0.84846	Gain_of_catalytic_residue_at_A272_(P_=_0),_Gain_of_relative_solvent_accessibility_(P_=_0.09),_Loss_of_MoRF_binding_(P_=_0.1367),_Gain_of_solvent_accessibility_(P_=_0.1376),_Gain_of_loop_(P_=_0.2045)	0.77352	0.45235
rs755851961	14:94380977-94380977	C	missense_variant	ENST00000448921.5:c.811A>G	ENSP00000416066.1:p.Asn271Asp	1384	811	271	N/D	Aat/Gat	7.953e-06	0	0	0	0	0	1.758e-05	0	0	-	30223862	tolerated(0.28)	benign(0.052)	15.23	neutral(0.035)	T	0.43475	-0.0563518	T	0.16781	0.57255	0.75659	1.23544	-0.47946	0.88455	0.4424	0.74766	0.4496	D	D	0.64249	0.08001	D	0.83393	T	0.7815	Gain_of_catalytic_residue_at_A272_(P_=_6e-04),_Gain_of_sheet_(P_=_0.0827),_Loss_of_MoRF_binding_(P_=_0.1027),_Gain_of_ubiquitination_at_K267_(P_=_0.2382),_Loss_of_methylation_at_K267_(P_=_0.3615)	0.82645	0.3949
rs1412064727	14:94380987-94380987	G	missense_variant	ENST00000448921.5:c.801A>C	ENSP00000416066.1:p.Lys267Asn	1374	801	267	K/N	aaA/aaC	-	-	-	-	-	-	-	-	-	-	-	tolerated(0.38)	benign(0.019)	7.936	neutral(0.019)	T	0.277	-0.153914	T	0.03212	0.16301	0.52874	0.180267	-1.34655	0.84341	0.05811	0.51787	0.08031	N	D	0.57455	0.05475	T	0.70109	T	0.54238	Gain_of_catalytic_residue_at_A272_(P_=_2e-04),_Loss_of_MoRF_binding_(P_=_0.0419),_Loss_of_ubiquitination_at_K267_(P_=_0.0496),_Loss_of_stability_(P_=_0.1739),_Loss_of_methylation_at_K267_(P_=_0.1767)	0.77022	0.16971
rs779843923	14:94380991-94380991	G	missense_variant	ENST00000448921.5:c.797T>C	ENSP00000416066.1:p.Met266Thr	1370	797	266	M/T	aTg/aCg	7.953e-06	0	0	0	0	0	1.758e-05	0	0	-	-	tolerated(0.09)	benign(0.364)	14.38	neutral(0.412)	D	0.67802	0.134551	D	0.64264	0.14175	0.88847	1.49111	-0.33637	0.85468	0.43823	0.74766	0.20116	N	D	0.81514	0.22029	D	0.90887	D	0.87254	Gain_of_catalytic_residue_at_V263_(P_=_0.0029),_Gain_of_methylation_at_K267_(P_=_0.031),_Loss_of_stability_(P_=_0.0664),_Loss_of_MoRF_binding_(P_=_0.0865),_Loss_of_sheet_(P_=_0.1501)	0.81586	0.85306
rs1200349975	14:94381001-94381002	CC	frameshift_variant	ENST00000448921.5:c.787del	ENSP00000416066.1:p.Val263CysfsTer3	1358-1360	785-787	262-263	WV/WX	tGGGtg/tGGtg	-	-	-	-	-	-	-	-	-	-	-	-	-	-	-	-	-	-	-	-	-	-	-	-	-	-	-	-	-	-	-	-	-	-	-	-	-	-	-
rs1170614686	14:94381002-94381002	A	missense_variant	ENST00000448921.5:c.786G>T	ENSP00000416066.1:p.Trp262Cys	1359	786	262	W/C	tgG/tgT	7.953e-06	0	0	0	0.0001088	0	0	0	0	-	-	deleterious(0.02)	probably_damaging(0.974)	24.3	deleterious(0.799)	T	0.35166	-0.107601	D	0.58732	0.44082	0.80256	2.78507	0.112192	0.8397	0.47196	0.74766	0.08975	N	D	0.82212	0.12439	D	0.90933	D	0.88416	Gain_of_catalytic_residue_at_S260_(P_=_0),_Loss_of_MoRF_binding_(P_=_0.0199),_Loss_of_stability_(P_=_0.1073),_Loss_of_methylation_at_K258_(P_=_0.1436),_Loss_of_ubiquitination_at_K258_(P_=_0.2224)	0.73576	0.85968
rs778732023	14:94381006-94381006	A	missense_variant	ENST00000448921.5:c.782G>T	ENSP00000416066.1:p.Ser261Ile	1355	782	261	S/I	aGc/aTc	3.977e-06	0	0	0	0	0	8.792e-06	0	0	-	-	deleterious(0.02)	probably_damaging(0.939)	23.7	deleterious(0.768)	D	0.61	0.0712519	D	0.6932	0.55777	0.78782	3.09402	0.181484	0.83893	0.67566	0.74766	0.33689	N	D	0.82058	0.34018	D	0.90225	D	0.92309	Gain_of_catalytic_residue_at_S260_(P_=_2e-04),_Gain_of_methylation_at_K258_(P_=_0.0765),_Gain_of_sheet_(P_=_0.0827),_Gain_of_MoRF_binding_(P_=_0.1205),_Gain_of_ubiquitination_at_K258_(P_=_0.2122)	0.87983	0.76335
rs376294932	14:94381017-94381017	A	missense_variant	ENST00000448921.5:c.771G>T	ENSP00000416066.1:p.Lys257Asn	1344	771	257	K/N	aaG/aaT	3.977e-06	0	0	0	0	0	8.793e-06	0	0	-	-	tolerated(0.14)	benign(0.015)	3.561	neutral(0.250)	T	0.26082	-0.16442	T	0.07129	0.06041	0.49771	0.132643	-1.43953	0.87671	0.09715	0.50053	0.00946	N	D	0.67532	0.05378	T	0.78372	T	0.60866	-	-	0.21244
rs376294932	14:94381017-94381017	G	missense_variant	ENST00000448921.5:c.771G>C	ENSP00000416066.1:p.Lys257Asn	1344	771	257	K/N	aaG/aaC	3.977e-06	0	0	0	0	0	8.793e-06	0	0	-	-	tolerated(0.14)	benign(0.015)	2.76	neutral(0.250)	T	0.26077	-0.164459	T	0.07213	0.0568	0.49771	0.132643	-1.43953	0.87671	0.09715	0.50053	0.00946	N	D	0.67341	0.05378	T	0.78372	T	0.60866	Gain_of_catalytic_residue_at_S260_(P_=_0),_Loss_of_methylation_at_K257_(P_=_0.0011),_Loss_of_MoRF_binding_(P_=_0.0391),_Loss_of_ubiquitination_at_K257_(P_=_0.0446),_Loss_of_loop_(P_=_0.2237)	0.53552	0.21244
rs753068726	14:94381019-94381019	C	missense_variant	ENST00000448921.5:c.769A>G	ENSP00000416066.1:p.Lys257Glu	1342	769	257	K/E	Aag/Gag	-	-	-	-	-	-	-	-	-	-	-	tolerated(1)	benign(0)	0.018	neutral(0.000)	T	0.00548	-0.503232	T	0.07464	0.0101	0.444	0.0390963	-1.76592	0.86624	0.03606	0.74766	0.00946	N	D	0.62536	0.06166	T	0.60893	T	0.65209	Loss_of_methylation_at_K257_(P_=_0.0011),_Gain_of_catalytic_residue_at_S260_(P_=_0.0013),_Loss_of_MoRF_binding_(P_=_0.0017),_Loss_of_ubiquitination_at_K257_(P_=_0.0446),_Loss_of_loop_(P_=_0.2237)	0.56767	0.00691
rs8350	14:94381020-94381020	C	missense_variant	ENST00000448921.5:c.768T>G	ENSP00000416066.1:p.Cys256Trp	1341	768	256	C/W	tgT/tgG	-	-	-	-	-	-	-	-	-	-	-	tolerated(0.18)	probably_damaging(0.974)	6.774	deleterious(0.472)	T	0.53553	0.0138771	D	0.36835	0.24524	0.77213	0.746312	-0.808196	0.87433	0.07747	0.50053	0.2813	N	D	0.87773	0.33664	D	0.89664	D	0.83459	Gain_of_catalytic_residue_at_N252_(P_=_0.0097),_Gain_of_MoRF_binding_(P_=_0.0249),_Loss_of_methylation_at_K257_(P_=_0.0377),_Loss_of_stability_(P_=_0.2186),_Gain_of_ubiquitination_at_K257_(P_=_0.2462)	0.85401	0.82803
rs763249215	14:94381026-94381026	G	missense_variant	ENST00000448921.5:c.762G>C	ENSP00000416066.1:p.Gln254His	1335	762	254	Q/H	caG/caC	-	-	-	-	-	-	-	-	-	-	-	tolerated(1)	benign(0)	0.035	neutral(0.000)	T	0.00371	-0.532548	T	0.06073	0.00205	0.44353	0.0326479	-1.80843	0.87194	0.01527	0.74766	0.00848	N	D	0.55359	0.04596	T	0.57534	T	0.62732	Gain_of_catalytic_residue_at_N252_(P_=_0.0011),_Loss_of_MoRF_binding_(P_=_0.0831),_Loss_of_methylation_at_K258_(P_=_0.1221),_Gain_of_sheet_(P_=_0.1451),_Loss_of_stability_(P_=_0.1477)	0.73456	0.00794
rs1566753789	14:94381027-94381027	C	missense_variant	ENST00000448921.5:c.761A>G	ENSP00000416066.1:p.Gln254Arg	1334	761	254	Q/R	cAg/cGg	-	-	-	-	-	-	-	-	-	likely_benign	-	tolerated(0.12)	benign(0)	8.894	neutral(0.261)	T	0.31467	-0.130182	T	0.09523	0.18434	0.49813	0.344445	-1.1314	0.87116	0.10292	0.48965	0.00848	N	D	0.51841	0.0509	T	0.74604	T	0.61113	Gain_of_catalytic_residue_at_Q254_(P_=_0.0019),_Gain_of_MoRF_binding_(P_=_0.0199),_Loss_of_methylation_at_K258_(P_=_0.0633),_Gain_of_relative_solvent_accessibility_(P_=_0.1259),_Gain_of_solvent_accessibility_(P_=_0.1319)	0.79885	0.122
rs764431473	14:94381028-94381028	A	stop_gained	ENST00000448921.5:c.760C>T	ENSP00000416066.1:p.Gln254Ter	1333	760	254	Q/*	Cag/Tag	-	-	-	-	-	-	-	-	-	-	-	-	-	34	-	D	0.78589	0.249886	-	-	0.18069	-	0.860646	-0.727271	-	0.13802	0.48965	0.00848	N	-	-	-	-	-	-	-	-	-	-
rs575123943	14:94381031-94381031	G	missense_variant	ENST00000448921.5:c.757A>C	ENSP00000416066.1:p.Ile253Leu	1330	757	253	I/L	Atc/Ctc	6.364e-05	0	0	0	0.0003806	4.62e-05	4.397e-05	0.0001629	6.533e-05	-	-	tolerated(1)	benign(0.003)	0.002	neutral(0.000)	T	0.02565	-0.3932	T	0.0452	0.02451	0.51066	0.00957185	-2.06933	0.8366	0.0033	0.98316	0.01959	N	T	0.34542	0.04821	T	0.5199	T	0.53834	Gain_of_catalytic_residue_at_C256_(P_=_0.0044),_Loss_of_methylation_at_K258_(P_=_0.0939),_Loss_of_MoRF_binding_(P_=_0.1099),_Gain_of_sheet_(P_=_0.1451),_Gain_of_ubiquitination_at_K258_(P_=_0.1827)	0.63989	0.01466
rs777012321	14:94381034-94381034	A	missense_variant	ENST00000448921.5:c.754A>T	ENSP00000416066.1:p.Asn252Tyr	1327	754	252	N/Y	Aac/Tac	7.955e-06	0	0	0	0	0	0	0	6.533e-05	-	-	tolerated(1)	benign(0.135)	1.193	neutral(0.011)	T	0.13669	-0.253529	T	0.14674	0.2937	0.76567	0.178217	-1.3501	0.84267	0.01597	0.74766	0.06584	N	D	0.76362	0.1044	T	0.74239	T	0.63989	Gain_of_catalytic_residue_at_C256_(P_=_0.0013),_Loss_of_MoRF_binding_(P_=_0.1325),_Loss_of_loop_(P_=_0.2237),_Loss_of_ubiquitination_at_K257_(P_=_0.2646),_Loss_of_sheet_(P_=_0.302)	0.47501	0.15989
rs759837735	14:94381036-94381036	C	missense_variant	ENST00000448921.5:c.752T>G	ENSP00000416066.1:p.Phe251Cys	1325	752	251	F/C	tTt/tGt	1.591e-05	0	0.0001156	0	0	0	0	0	0	-	-	deleterious(0)	possibly_damaging(0.802)	22.6	deleterious(0.746)	T	0.44433	-0.0500979	D	0.34559	0.32375	0.88333	1.30875	-0.436012	0.86146	0.1922	0.48965	0.26953	N	D	0.76293	0.37282	D	0.9291	D	0.86369	Gain_of_catalytic_residue_at_N252_(P_=_0.0096),_Loss_of_MoRF_binding_(P_=_0.1028),_Loss_of_loop_(P_=_0.2237),_Loss_of_sheet_(P_=_0.302),_Loss_of_ubiquitination_at_K246_(P_=_0.3642)	0.73934	0.95841
rs1382158101	14:94381039-94381039	G	missense_variant	ENST00000448921.5:c.749T>C	ENSP00000416066.1:p.Met250Thr	1322	749	250	M/T	aTg/aCg	3.977e-06	0	0	0	0	0	0	0	3.266e-05	-	-	tolerated(0.16)	benign(0.057)	4.076	neutral(0.063)	T	0.37004	-0.0965042	T	0.22773	0.03068	0.61264	0.326879	-1.15002	0.8366	0.11987	0.48965	0.18379	N	D	0.58991	0.09786	T	0.69581	T	0.53846	Gain_of_catalytic_residue_at_N252_(P_=_0.015),_Loss_of_stability_(P_=_0.0404),_Loss_of_sheet_(P_=_0.1158),_Loss_of_MoRF_binding_(P_=_0.1166),_Gain_of_phosphorylation_at_M250_(P_=_0.3083)	0.45367	0.26193
rs765419872	14:94381040-94381040	A	missense_variant	ENST00000448921.5:c.748A>T	ENSP00000416066.1:p.Met250Leu	1321	748	250	M/L	Atg/Ttg	3.977e-06	0	0	0	5.437e-05	0	0	0	0	-	-	tolerated(0.36)	benign(0.015)	6.089	neutral(0.021)	T	0.29833	-0.140364	T	0.05523	0.0268	0.57149	0.596395	-0.917654	0.8397	0.30588	0.51787	0.18379	N	T	0.47347	0.04596	T	0.74121	T	0.57334	Gain_of_catalytic_residue_at_N252_(P_=_0.005),_Loss_of_MoRF_binding_(P_=_0.0716),_Gain_of_sheet_(P_=_0.1451),_Loss_of_loop_(P_=_0.2237),_Loss_of_ubiquitination_at_K246_(P_=_0.3677)	0.51107	0.29013
rs765419872	14:94381040-94381040	C	missense_variant	ENST00000448921.5:c.748A>G	ENSP00000416066.1:p.Met250Val	1321	748	250	M/V	Atg/Gtg	-	-	-	-	-	-	-	-	-	-	-	tolerated(0.32)	benign(0.015)	4.451	neutral(0.025)	T	0.46643	-0.0353129	T	0.109	0.03506	0.5989	0.6536	-0.875378	0.8397	0.30588	0.51787	0.18379	N	T	0.462	0.04982	T	0.77134	T	0.61729	Gain_of_catalytic_residue_at_M250_(P_=_0),_Loss_of_MoRF_binding_(P_=_0.0947),_Gain_of_sheet_(P_=_0.1208),_Loss_of_stability_(P_=_0.1362),_Loss_of_loop_(P_=_0.2237)	0.5274	0.49225
rs577164283	14:94381042-94381042	G	missense_variant	ENST00000448921.5:c.746G>C	ENSP00000416066.1:p.Gly249Ala	1319	746	249	G/A	gGc/gCc	3.182e-05	0	0	0	0.000435	0	0	0	0	-	-	deleterious(0)	possibly_damaging(0.698)	20.4	deleterious(0.696)	T	0.28928	-0.146069	D	0.34287	0.59738	0.77474	1.63896	-0.264492	0.88924	0.48138	0.74766	0.53742	D	D	0.75809	0.33023	D	0.89455	D	0.90092	Gain_of_catalytic_residue_at_N252_(P_=_0.0148),_Gain_of_MoRF_binding_(P_=_0.1204),_Loss_of_loop_(P_=_0.2237),_Loss_of_sheet_(P_=_0.302),_Loss_of_ubiquitination_at_K246_(P_=_0.3677)	0.82359	0.52218
rs764220898	14:94381043-94381043	G	missense_variant	ENST00000448921.5:c.745G>C	ENSP00000416066.1:p.Gly249Arg	1318	745	249	G/R	Ggc/Cgc	7.955e-06	0	0	0	0	0	1.759e-05	0	0	likely_pathogenic	21474916,19437508	deleterious(0.01)	possibly_damaging(0.895)	22.2	deleterious(0.758)	D	0.76906	0.231968	D	0.57877	0.9137	0.79882	1.77288	-0.205372	0.89219	0.48303	0.74766	0.53742	D	D	0.89116	0.33476	D	0.92395	D	0.92757	-	-	0.77586
rs764220898	14:94381043-94381043	T	missense_variant	ENST00000448921.5:c.745G>A	ENSP00000416066.1:p.Gly249Ser	1318	745	249	G/S	Ggc/Agc	1.193e-05	0	0	0	0	0	1.759e-05	0	3.266e-05	-	21474916,19437508	deleterious(0.03)	possibly_damaging(0.722)	21.6	deleterious(0.627)	T	0.39941	-0.0786015	D	0.61983	0.75533	0.77181	1.48454	-0.339696	0.88611	0.48303	0.74766	0.53742	N	D	0.75796	0.30629	D	0.88707	D	0.87228	Gain_of_catalytic_residue_at_N252_(P_=_0.0179),_Loss_of_sheet_(P_=_0.1158),_Gain_of_MoRF_binding_(P_=_0.1359),_Gain_of_phosphorylation_at_G249_(P_=_0.2944),_Loss_of_ubiquitination_at_K246_(P_=_0.3677)	0.82167	0.42016
rs544632177	14:94381048-94381048	T	missense_variant	ENST00000448921.5:c.740G>A	ENSP00000416066.1:p.Arg247His	1313	740	247	R/H	cGt/cAt	0.0001631	6.153e-05	0	0	0	0	3.519e-05	0	0.001176	uncertain_significance	-	tolerated(0.09)	benign(0.132)	12.25	neutral(0.307)	T	0.13022	-0.258956	T	0.09834	0.43506	0.77098	0.94133	-0.671189	0.84487	0.35933	0.74766	0.3456	N	D	0.67818	0.1259	T	0.78656	T	0.67855	-	-	0.62545
rs28929470	14:94381049-94381049	A	missense_variant	ENST00000448921.5:c.739C>T	ENSP00000416066.1:p.Arg247Cys	1312	739	247	R/C	Cgt/Tgt	0.00212	0.001169	0.0001156	0.0003971	0	0.0005083	0.004276	0.001466	0	uncertain_significance,other,conflicting_interpretations_of_pathogenicity,pathogenic	24033266,2696185,2035534,8912354,22078084,30804561	deleterious(0.02)	possibly_damaging(0.836)	23.9	deleterious(0.703)	T	0.52532	0.00639569	T	0.15251	0.95076	0.8516	1.81479	-0.187981	0.84773	0.47038	0.74766	0.3456	N	D	0.76179	0.19618	D	0.90647	D	0.85692	-	-	0.94732
rs28929470	14:94381049-94381049	T	missense_variant	ENST00000448921.5:c.739C>A	ENSP00000416066.1:p.Arg247Ser	1312	739	247	R/S	Cgt/Agt	-	-	-	-	-	-	-	-	-	-	24033266,2696185,2035534,8912354,22078084,30804561	deleterious(0.03)	probably_damaging(0.949)	23.1	deleterious(0.758)	D	0.71712	0.176409	D	0.71007	0.55624	0.77266	2.05129	-0.0984971	0.84047	0.47038	0.74766	0.3456	N	D	0.73512	0.33204	D	0.90159	T	0.81964	Gain_of_catalytic_residue_at_V242_(P_=_0),_Loss_of_MoRF_binding_(P_=_0.0179),_Gain_of_ubiquitination_at_K246_(P_=_0.0645),_Loss_of_sheet_(P_=_0.1158),_Loss_of_loop_(P_=_0.2237)	0.86018	0.80084
rs864622054	14:94381051-94381051	G	missense_variant	ENST00000448921.5:c.737A>C	ENSP00000416066.1:p.Lys246Thr	1310	737	246	K/T	aAg/aCg	-	-	-	-	-	-	-	-	-	likely_benign	-	tolerated(0.37)	benign(0.01)	0.003	neutral(0.019)	T	0.2705	-0.158116	T	0.05934	0.05003	0.51114	0.0331471	-1.80487	0.87194	0.01912	0.74766	0.02253	N	D	0.57174	0.05625	T	0.75023	T	0.61099	Gain_of_catalytic_residue_at_V242_(P_=_3e-04),_Loss_of_MoRF_binding_(P_=_0.05),_Loss_of_stability_(P_=_0.0737),_Gain_of_ubiquitination_at_K241_(P_=_0.1446),_Loss_of_loop_(P_=_0.2237)	0.5581	0.18813
rs1379377700	14:94381052-94381052	C	missense_variant	ENST00000448921.5:c.736A>G	ENSP00000416066.1:p.Lys246Glu	1309	736	246	K/E	Aag/Gag	-	-	-	-	-	-	-	-	-	-	-	tolerated(0.21)	benign(0.009)	4.59	neutral(0.044)	T	0.37789	-0.0917333	T	0.19932	0.18477	0.48172	0.444137	-1.03713	0.87433	0.09876	0.48965	0.02253	N	D	0.68875	0.06355	D	0.85127	T	0.669	Gain_of_catalytic_residue_at_V242_(P_=_2e-04),_Loss_of_MoRF_binding_(P_=_0.0076),_Gain_of_ubiquitination_at_K241_(P_=_0.0526),_Gain_of_relative_solvent_accessibility_(P_=_0.1259),_Gain_of_solvent_accessibility_(P_=_0.1903)	0.56129	0.41611
rs864622053	14:94381053-94381053	T	missense_variant	ENST00000448921.5:c.735G>A	ENSP00000416066.1:p.Met245Ile	1308	735	245	M/I	atG/atA	-	-	-	-	-	-	-	-	-	likely_benign	-	tolerated(0.28)	benign(0.166)	13.06	neutral(0.046)	D	0.70137	0.159318	D	0.41799	0.37035	0.91765	2.3011	-0.0172639	0.92407	0.50718	0.74766	0.62929	D	D	0.73623	0.20437	D	0.93575	D	0.93299	Gain_of_catalytic_residue_at_V240_(P_=_0),_Gain_of_methylation_at_K246_(P_=_0.049),_Loss_of_ubiquitination_at_K241_(P_=_0.0534),_Loss_of_MoRF_binding_(P_=_0.1012),_Gain_of_sheet_(P_=_0.1451)	0.91288	0.93167
rs766260108	14:94381054-94381054	G	missense_variant	ENST00000448921.5:c.734T>C	ENSP00000416066.1:p.Met245Thr	1307	734	245	M/T	aTg/aCg	3.979e-06	0	0	0	0	0	8.799e-06	0	0	-	31307431,30223862	deleterious(0.05)	probably_damaging(0.983)	24.2	deleterious(0.774)	D	0.9265	0.453828	D	0.82411	0.41677	0.93787	7.71398	0.697939	0.92938	0.72285	0.74766	0.62929	D	D	0.79195	0.32764	D	0.9804	D	0.9939	Gain_of_catalytic_residue_at_V240_(P_=_0),_Loss_of_stability_(P_=_0.0404),_Gain_of_phosphorylation_at_M245_(P_=_0.0758),_Loss_of_MoRF_binding_(P_=_0.0887),_Loss_of_ubiquitination_at_K241_(P_=_0.0919)	0.92923	0.9955
rs1241932181	14:94381058-94381058	C	missense_variant	ENST00000448921.5:c.730A>G	ENSP00000416066.1:p.Met244Val	1303	730	244	M/V	Atg/Gtg	3.979e-06	6.154e-05	0	0	0	0	0	0	0	-	-	deleterious(0.04)	possibly_damaging(0.784)	23.6	deleterious(0.642)	T	0.55407	0.0276292	D	0.59343	0.458	0.91629	4.02828	0.351031	0.8822	0.30756	0.74766	0.40136	N	D	0.84116	0.27222	D	0.9426	D	0.93819	Gain_of_catalytic_residue_at_V242_(P_=_5e-04),_Loss_of_ubiquitination_at_K241_(P_=_0.0919),_Loss_of_MoRF_binding_(P_=_0.1156),_Loss_of_sheet_(P_=_0.1398),_Gain_of_phosphorylation_at_T239_(P_=_0.2692)	0.9359	0.97446
rs1316729320	14:94381061-94381061	A	missense_variant	ENST00000448921.5:c.727C>T	ENSP00000416066.1:p.Pro243Ser	1300	727	243	P/S	Cct/Tct	-	-	-	-	-	-	-	-	-	likely_benign	-	deleterious(0.02)	probably_damaging(0.957)	23.2	deleterious(0.784)	D	0.65106	0.107627	D	0.39978	0.92316	0.83218	2.97692	0.156214	0.89822	0.72285	0.74766	0.62929	D	D	0.82718	0.17722	D	0.94029	D	0.94465	Gain_of_catalytic_residue_at_P243_(P_=_0),_Gain_of_MoRF_binding_(P_=_0.0399),_Loss_of_methylation_at_K241_(P_=_0.0749),_Loss_of_ubiquitination_at_K241_(P_=_0.0919),_Gain_of_sheet_(P_=_0.1451)	0.88562	0.76995
rs753621457	14:94381063-94381063	G	missense_variant	ENST00000448921.5:c.725T>C	ENSP00000416066.1:p.Val242Ala	1298	725	242	V/A	gTg/gCg	7.96e-06	0.0001231	0	0	0	0	0	0	0	-	-	deleterious(0.01)	probably_damaging(1)	24.6	deleterious(0.905)	D	0.78142	0.245116	D	0.78853	0.82904	0.88128	5.92564	0.575139	0.92613	0.72285	0.74766	0.31877	N	D	0.80872	0.35112	D	0.96698	D	0.97748	Gain_of_catalytic_residue_at_V240_(P_=_0),_Loss_of_methylation_at_K241_(P_=_0.0438),_Loss_of_sheet_(P_=_0.1398),_Loss_of_MoRF_binding_(P_=_0.141),_Loss_of_ubiquitination_at_K241_(P_=_0.1473)	0.9299	0.944
rs199422211	14:94381067-94381067	A	stop_gained	ENST00000448921.5:c.721A>T	ENSP00000416066.1:p.Lys241Ter	1294	721	241	K/*	Aag/Tag	1.593e-05	6.16e-05	0	0	0	0	2.642e-05	0	0	other,pathogenic/likely_pathogenic	18353624,2642408,3257351,7980208,25425243	-	-	36	-	D	0.9216	0.442937	-	-	0.54527	-	1.73566	-0.221285	-	0.30173	0.51787	0.10705	N	-	-	-	-	-	-	-	-	-	-
rs1401368743	14:94381069-94381069	T	missense_variant	ENST00000448921.5:c.719T>A	ENSP00000416066.1:p.Val240Glu	1292	719	240	V/E	gTg/gAg	-	-	-	-	-	-	-	-	-	-	-	deleterious(0)	probably_damaging(0.992)	24.3	deleterious(0.892)	D	0.86669	0.352484	D	0.84427	0.47511	0.8632	4.86391	0.466048	0.89888	0.72285	0.74766	0.42254	D	D	0.88865	0.38883	D	0.95502	D	0.96676	Gain_of_catalytic_residue_at_V242_(P_=_5e-04),_Gain_of_disorder_(P_=_0.0085),_Loss_of_sheet_(P_=_0.0357),_Loss_of_methylation_at_K241_(P_=_0.0447),_Loss_of_MoRF_binding_(P_=_0.1016)	0.92855	0.94526
rs72552401	14:94381070-94381070	T	missense_variant	ENST00000448921.5:c.718G>A	ENSP00000416066.1:p.Val240Met	1291	718	240	V/M	Gtg/Atg	0.0003544	0	0	0	0.004622	0	2.643e-05	0	3.267e-05	likely_benign,uncertain_significance	-	deleterious(0)	probably_damaging(0.954)	22.2	deleterious(0.842)	T	0.3507	-0.10818	T	0.2548	0.90502	0.84536	3.11011	0.184861	0.89953	0.50718	0.74766	0.42254	D	D	0.8161	0.33406	D	0.94359	D	0.95141	-	-	0.95663
rs1164468748	14:94381072-94381072	T	missense_variant	ENST00000448921.5:c.716C>A	ENSP00000416066.1:p.Thr239Asn	1289	716	239	T/N	aCc/aAc	-	-	-	-	-	-	-	-	-	-	-	deleterious(0.03)	benign(0.052)	14.14	neutral(0.367)	T	0.46418	-0.0368445	T	0.2639	0.11683	0.78843	0.688078	-0.850288	0.84773	0.28492	0.51787	0.23946	N	D	0.62934	0.07775	T	0.81086	T	0.7321	Gain_of_catalytic_residue_at_V240_(P_=_0),_Loss_of_phosphorylation_at_T239_(P_=_0.0795),_Loss_of_glycosylation_at_T239_(P_=_0.081),_Loss_of_ubiquitination_at_K241_(P_=_0.1179),_Loss_of_sheet_(P_=_0.1398)	0.59134	0.81115
rs1158756052	14:94381073-94381073	C	missense_variant	ENST00000448921.5:c.715A>G	ENSP00000416066.1:p.Thr239Ala	1288	715	239	T/A	Acc/Gcc	3.982e-06	0	0	0	0	0	8.808e-06	0	0	-	-	deleterious(0.05)	benign(0.015)	17.75	neutral(0.346)	T	0.49818	-0.0131872	T	0.31033	0.25201	0.7761	1.19454	-0.504545	0.84557	0.46726	0.74766	0.23946	N	D	0.74857	0.07957	D	0.84662	D	0.8407	Gain_of_catalytic_residue_at_V240_(P_=_0),_Loss_of_phosphorylation_at_T239_(P_=_0.0795),_Loss_of_glycosylation_at_T239_(P_=_0.081),_Loss_of_sheet_(P_=_0.1398),_Loss_of_ubiquitination_at_K241_(P_=_0.1473)	0.58978	0.82803
rs1057516448	14:94381074-94381075	G	frameshift_variant	ENST00000448921.5:c.714del	ENSP00000416066.1:p.Thr239ProfsTer2	1286-1287	713-714	238	T/X	aCC/aC	-	-	-	-	-	-	-	-	-	likely_pathogenic	-	-	-	-	-	-	-	-	-	-	-	-	-	-	-	-	-	-	-	-	-	-	-	-	-	-	-	-	-
rs758136730	14:94381075-94381075	A	missense_variant	ENST00000448921.5:c.713C>T	ENSP00000416066.1:p.Thr238Ile	1286	713	238	T/I	aCc/aTc	7.964e-06	0	0	0	0	0	1.762e-05	0	0	-	-	deleterious(0.03)	probably_damaging(0.917)	23.4	deleterious(0.732)	D	0.66805	0.124341	D	0.68033	0.86693	0.82205	4.75115	0.452218	0.85173	0.72285	0.74766	0.41888	D	D	0.7832	0.30657	D	0.92942	D	0.94118	Gain_of_catalytic_residue_at_V240_(P_=_0),_Loss_of_disorder_(P_=_0.048),_Loss_of_phosphorylation_at_T238_(P_=_0.1225),_Loss_of_sheet_(P_=_0.1398),_Gain_of_ubiquitination_at_K241_(P_=_0.1446)	0.69288	0.85602
rs6647	14:94381078-94381078	G	missense_variant	ENST00000448921.5:c.710T>C	ENSP00000416066.1:p.Val237Ala	1283	710	237	V/A	gTg/gCg	0.2095	0.5585	0.09408	0.2589	0.02127	0.2986	0.2176	0.2116	0.16	benign	25741868,24033266,28265093,21625484,23226977,22426792,2696185,25425243,22723858,25287719,23487758,16784755,30182779	tolerated(0.57)	benign(0)	0.018	neutral(0.006)	T	0.0024	-0.564147	T	0.00115	0.01752	0.44305	0.00303659	-2.29223	0.83495	0.00369	0.74766	0.00778	N	-	-	0.05491	T	0.00011	T	0.09523	-	-	0.02162
rs1405404338	14:94381080-94381082	-	frameshift_variant	ENST00000448921.5:c.706_707del	ENSP00000416066.1:p.Gln236GlyfsTer16	1279-1280	706-707	236	Q/X	CAg/g	0	0	0	0	0	0	0	0	0	-	-	-	-	22.4	-	-	-	-	-	-	-	-	-	-	-	-	-	-	-	-	-	-	-	-	-	-	-	-	-
rs1315361669	14:94381080-94381088	C	frameshift_variant	ENST00000448921.5:c.701_708del	ENSP00000416066.1:p.Val234GlyfsTer16	1273-1281	700-708	234-236	VDQ/X	GTGGACCAG/G	-	-	-	-	-	-	-	-	-	-	-	-	-	25	-	-	-	-	-	-	-	-	-	-	-	-	-	-	-	-	-	-	-	-	-	-	-	-	-
rs746531546	14:94381081-94381081	C	missense_variant	ENST00000448921.5:c.707A>G	ENSP00000416066.1:p.Gln236Arg	1280	707	236	Q/R	cAg/cGg	1.992e-05	0	0	0	0	0	4.405e-05	0	0	likely_benign	-	tolerated(0.07)	benign(0.024)	10.65	neutral(0.320)	T	0.2409	-0.177629	T	0.02349	0.27243	0.55534	0.429759	-1.0497	0.87116	0.10063	0.50053	0.04652	N	D	0.70553	0.059	D	0.8131	T	0.66434	-	-	0.3078
rs771419213	14:94381082-94381082	T	missense_variant	ENST00000448921.5:c.706C>A	ENSP00000416066.1:p.Gln236Lys	1279	706	236	Q/K	Cag/Aag	0	0	0	0	0	0	0	0	0	-	-	tolerated(0.45)	benign(0.003)	0.046	neutral(0.012)	T	0.22606	-0.187648	T	0.17579	0.03945	0.49596	0.0962896	-1.53172	0.86283	0.05261	0.51787	0.04652	N	D	0.6172	0.05734	T	0.6941	T	0.5782	Gain_of_catalytic_residue_at_V240_(P_=_0),_Gain_of_methylation_at_Q236_(P_=_0.0017),_Gain_of_ubiquitination_at_Q236_(P_=_0.0247),_Gain_of_disorder_(P_=_0.099),_Gain_of_phosphorylation_at_T239_(P_=_0.1489)	0.42903	0.03115
rs777051992	14:94381083-94381083	T	missense_variant	ENST00000448921.5:c.705C>A	ENSP00000416066.1:p.Asp235Glu	1278	705	235	D/E	gaC/gaA	1.593e-05	0	0	0	0	0	0	0	0.0001308	-	-	deleterious(0)	benign(0.066)	0.429	neutral(0.449)	T	0.23539	-0.181326	T	0.2056	0.25781	0.77405	0.548026	-0.95401	0.88377	0.06621	0.50053	0.29068	N	D	0.71209	0.09924	D	0.87238	T	0.80809	Gain_of_catalytic_residue_at_V240_(P_=_0),_Gain_of_disorder_(P_=_0.1155),_Gain_of_solvent_accessibility_(P_=_0.2192),_Gain_of_relative_solvent_accessibility_(P_=_0.2363),_Gain_of_glycosylation_at_T239_(P_=_0.2672)	0.76132	0.8176
rs1223149881	14:94381084-94381084	A	frameshift_variant	ENST00000448921.5:c.703_704insT	ENSP00000416066.1:p.Asp235ValfsTer18	1276-1277	703-704	235	D/VX	gac/gTac	0	0	0	0	0	0	0	0	0	-	-	-	-	25.3	-	-	-	-	-	-	-	-	-	-	-	-	-	-	-	-	-	-	-	-	-	-	-	-	-
rs1304523649	14:94381085-94381085	T	missense_variant	ENST00000448921.5:c.703G>A	ENSP00000416066.1:p.Asp235Asn	1276	703	235	D/N	Gac/Aac	0	0	0	0	0	0	0	0	0	-	-	tolerated(0.14)	benign(0.025)	12.35	neutral(0.251)	T	0.29598	-0.141836	T	0.25933	0.48399	0.76298	1.1631	-0.524243	0.87433	0.37134	0.74766	0.29068	N	D	0.59948	0.06772	T	0.78579	T	0.7145	Gain_of_catalytic_residue_at_V240_(P_=_0),_Loss_of_disorder_(P_=_0.1282),_Loss_of_phosphorylation_at_T239_(P_=_0.1948),_Loss_of_sheet_(P_=_0.302),_Loss_of_glycosylation_at_T239_(P_=_0.3655)	0.80894	0.34346
rs746197812	14:94381087-94381087	T	missense_variant	ENST00000448921.5:c.701T>A	ENSP00000416066.1:p.Val234Glu	1274	701	234	V/E	gTg/gAg	1.594e-05	0	2.893e-05	0	0	0	1.762e-05	0.0001632	0	uncertain_significance	31307431	deleterious(0)	probably_damaging(0.949)	24.2	deleterious(0.838)	D	0.80452	0.270127	D	0.68473	0.49208	0.82496	4.99495	0.481511	0.89293	0.72285	0.74766	0.33053	N	D	0.92679	0.3804	D	0.95234	D	0.96331	Gain_of_disorder_(P_=_0.0016),_Gain_of_catalytic_residue_at_V237_(P_=_0.0067),_Gain_of_glycosylation_at_T239_(P_=_0.0532),_Loss_of_sheet_(P_=_0.0817),_Loss_of_stability_(P_=_0.0856)	0.89998	0.94976
rs1318191431	14:94381087-94381092	-	frameshift_variant	ENST00000448921.5:c.696_700del	ENSP00000416066.1:p.His233GlyfsTer18	1269-1273	696-700	232-234	FHV/FX	ttCCACGtg/tttg	-	-	-	-	-	-	-	-	-	-	-	-	-	27.1	-	-	-	-	-	-	-	-	-	-	-	-	-	-	-	-	-	-	-	-	-	-	-	-	-
rs374168370	14:94381088-94381088	T	missense_variant	ENST00000448921.5:c.700G>A	ENSP00000416066.1:p.Val234Met	1273	700	234	V/M	Gtg/Atg	1.196e-05	0	0	0	0	0	1.763e-05	0	3.271e-05	-	-	deleterious(0)	possibly_damaging(0.785)	20.4	deleterious(0.738)	D	0.66878	0.125082	D	0.57138	0.84228	0.81446	2.43755	0.0224101	0.89219	0.37692	0.74766	0.33053	N	D	0.8413	0.28504	D	0.93636	D	0.95223	-	-	0.89877
rs1220038833	14:94381091-94381091	TCATTAAA	frameshift_variant	ENST00000448921.5:c.696_697insTTTAATGA	ENSP00000416066.1:p.His233PhefsTer8	1269-1270	696-697	232-233	-/FNX	-/TTTAATGA	-	-	-	-	-	-	-	-	-	-	-	-	-	27.4	-	-	-	-	-	-	-	-	-	-	-	-	-	-	-	-	-	-	-	-	-	-	-	-	-
rs763108861	14:94381091-94381091	T	missense_variant	ENST00000448921.5:c.697C>A	ENSP00000416066.1:p.His233Asn	1270	697	233	H/N	Cac/Aac	1.594e-05	0	0	0	0	0	3.525e-05	0	0	-	-	deleterious(0.01)	possibly_damaging(0.879)	22.4	deleterious(0.748)	T	0.51569	-0.00061231	D	0.36498	0.39369	0.80232	2.31245	-0.0138358	0.88533	0.37579	0.74766	0.17542	N	D	0.8207	0.32023	D	0.92495	D	0.92114	Gain_of_catalytic_residue_at_V237_(P_=_0.0015),_Loss_of_sheet_(P_=_0.1158),_Gain_of_disorder_(P_=_0.1925),_Gain_of_relative_solvent_accessibility_(P_=_0.2363),_Gain_of_phosphorylation_at_T238_(P_=_0.324)	0.74407	0.77224
rs1205077206	14:94381092-94381092	TTAAAA	inframe_insertion	ENST00000448921.5:c.695_696insTTTTAA	ENSP00000416066.1:p.Phe232_His233insPheAsn	1268-1269	695-696	232	F/FFN	ttc/ttTTTTAAc	0	0	0	0	0	0	0	0	0	-	-	-	-	17.68	-	-	-	-	-	-	-	-	-	-	-	-	-	-	-	-	-	-	-	-	-	-	-	-	-
rs145410420	14:94381095-94381095	T	missense_variant	ENST00000448921.5:c.693C>A	ENSP00000416066.1:p.Asp231Glu	1266	693	231	D/E	gaC/gaA	7.971e-06	0	0	0	0	0	1.762e-05	0	0	-	-	tolerated(0.09)	benign(0.043)	14.3	neutral(0.299)	T	0.30121	-0.138557	T	0.09801	0.3024	0.75998	1.03067	-0.610338	0.8397	0.37357	0.74766	0.22814	N	D	0.60557	0.04729	T	0.79383	T	0.70014	-	-	0.36004
rs199422208	14:94381106-94381106	T	missense_variant	ENST00000448921.5:c.682G>A	ENSP00000416066.1:p.Glu228Lys	1255	682	228	E/K	Gag/Aag	1.596e-05	6.186e-05	0	0	0	0	2.646e-05	0	0	other,uncertain_significance	2696185,31307431	tolerated(0.96)	benign(0)	0.001	neutral(0.000)	T	0.28948	-0.145941	T	0.01253	0.02498	0.43858	0.00699416	-2.13151	0.8366	0.00945	0.74766	0.02433	N	D	0.62499	0.05242	T	0.5169	T	0.56609	-	-	0.02162
rs1482768852	14:94381109-94381109	A	missense_variant	ENST00000448921.5:c.679A>T	ENSP00000416066.1:p.Thr227Ser	1252	679	227	T/S	Acc/Tcc	-	-	-	-	-	-	-	-	-	-	-	deleterious(0.01)	benign(0.338)	19.65	deleterious(0.512)	D	0.70344	0.161547	D	0.65138	0.19818	0.90998	2.78189	0.111431	0.92007	0.72285	0.74766	0.52346	D	D	0.77727	0.22698	D	0.95278	D	0.97659	Gain_of_catalytic_residue_at_F232_(P_=_0.0067),_Gain_of_disorder_(P_=_0.077),_Loss_of_sheet_(P_=_0.0817),_Gain_of_ubiquitination_at_K225_(P_=_0.1106),_Loss_of_methylation_at_K225_(P_=_0.1522)	0.7499	0.95555
rs1566754362	14:94381111-94381111	C	missense_variant	ENST00000448921.5:c.677A>G	ENSP00000416066.1:p.Asp226Gly	1250	677	226	D/G	gAc/gGc	-	-	-	-	-	-	-	-	-	uncertain_significance	-	tolerated(0.24)	benign(0)	3.746	neutral(0.037)	T	0.25219	-0.170091	D	0.35143	0.02498	0.55886	0.0693086	-1.62142	0.84487	0.09828	0.44174	0.00618	N	D	0.54496	0.05932	T	0.7572	T	0.52215	Gain_of_catalytic_residue_at_P221_(P_=_0.0039),_Gain_of_ubiquitination_at_K225_(P_=_0.0641),_Gain_of_methylation_at_K225_(P_=_0.0788),_Loss_of_phosphorylation_at_T227_(P_=_0.151),_Loss_of_sheet_(P_=_0.1907)	0.36861	0.23975
rs1421296365	14:94381112-94381112	A	missense_variant	ENST00000448921.5:c.676G>T	ENSP00000416066.1:p.Asp226Tyr	1249	676	226	D/Y	Gac/Tac	3.992e-06	0	0	0	0	0	8.823e-06	0	0	-	-	tolerated(0.94)	benign(0)	0.004	neutral(0.000)	T	0.22064	-0.191315	T	0.03174	0.04197	0.53408	0.0188625	-1.93008	0.84557	0.01887	0.74766	0.00618	N	D	0.62027	0.0564	T	0.68361	T	0.63993	Gain_of_catalytic_residue_at_P221_(P_=_0.0039),_Gain_of_phosphorylation_at_D226_(P_=_0.031),_Loss_of_disorder_(P_=_0.0381),_Gain_of_ubiquitination_at_K225_(P_=_0.0731),_Gain_of_methylation_at_K225_(P_=_0.1212)	0.4274	0.1252
rs866634673	14:94381123-94381123	G	missense_variant	ENST00000448921.5:c.665T>C	ENSP00000416066.1:p.Phe222Ser	1238	665	222	F/S	tTt/tCt	-	-	-	-	-	-	-	-	-	-	-	deleterious(0)	probably_damaging(1)	27.3	deleterious(0.945)	D	0.96328	0.564606	D	0.98729	0.92576	0.93024	7.60416	0.69194	0.97292	0.72285	0.74766	0.8433	D	D	0.91842	0.40095	D	0.99139	D	0.98432	Gain_of_catalytic_residue_at_P221_(P_=_0.0039),_Gain_of_disorder_(P_=_0.0064),_Gain_of_phosphorylation_at_F222_(P_=_0.0205),_Gain_of_ubiquitination_at_K225_(P_=_0.0641),_Loss_of_methylation_at_K225_(P_=_0.0798)	0.93193	0.98718
rs1555368744	14:94381124-94381124	G	missense_variant	ENST00000448921.5:c.664T>C	ENSP00000416066.1:p.Phe222Leu	1237	664	222	F/L	Ttt/Ctt	-	-	-	-	-	-	-	-	-	likely_benign	-	tolerated(0.07)	possibly_damaging(0.906)	23.8	deleterious(0.678)	D	0.95083	0.528125	D	0.48	0.88283	0.9195	6.45407	0.617861	0.97101	0.72285	0.74766	0.8433	D	D	0.8351	0.34779	D	0.98948	D	0.99067	Gain_of_catalytic_residue_at_P221_(P_=_0.0039),_Loss_of_methylation_at_K225_(P_=_0.0812),_Loss_of_ubiquitination_at_K225_(P_=_0.0896),_Gain_of_disorder_(P_=_0.1775),_Loss_of_sheet_(P_=_0.302)	0.95433	0.97183
rs368117781	14:94381126-94381126	T	missense_variant	ENST00000448921.5:c.662C>A	ENSP00000416066.1:p.Pro221His	1235	662	221	P/H	cCc/cAc	4.004e-06	6.2e-05	0	0	0	0	0	0	0	-	-	deleterious(0)	benign(0.442)	22.4	deleterious(0.589)	D	0.72674	0.186851	D	0.65534	0.46688	0.88259	3.3454	0.232268	0.85173	0.50718	0.74766	0.62929	D	D	0.71836	0.34122	D	0.86701	D	0.89068	-	-	0.91792
rs1405702444	14:94381129-94381129	A	missense_variant	ENST00000448921.5:c.659G>T	ENSP00000416066.1:p.Arg220Ile	1232	659	220	R/I	aGa/aTa	0	0	0	0	0	0	0	0	0	-	-	deleterious(0.02)	benign(0.003)	17.64	neutral(0.383)	T	0.43791	-0.0542933	D	0.32737	0.28997	0.7695	0.831778	-0.747541	0.84557	0.31881	0.46732	0.20748	N	D	0.70072	0.07664	T	0.69657	T	0.62512	Gain_of_catalytic_residue_at_P221_(P_=_0.002),_Loss_of_disorder_(P_=_0.0366),_Gain_of_methylation_at_K225_(P_=_0.0582),_Loss_of_solvent_accessibility_(P_=_0.1177),_Gain_of_sheet_(P_=_0.1208)	0.49961	0.05111
rs1445192595	14:94381134-94381134	A	missense_variant	ENST00000448921.5:c.654G>T	ENSP00000416066.1:p.Trp218Cys	1227	654	218	W/C	tgG/tgT	-	-	-	-	-	-	-	-	-	likely_benign	-	deleterious(0)	probably_damaging(0.941)	30	deleterious(0.831)	D	0.88287	0.373483	D	0.95858	0.61671	0.9445	10.6627	0.817532	0.95387	0.72285	0.74766	0.31308	N	D	0.94547	0.3861	D	0.98484	D	0.99623	Gain_of_catalytic_residue_at_K215_(P_=_0.0047),_Loss_of_sheet_(P_=_0.0817),_Gain_of_disorder_(P_=_0.1879),_Loss_of_MoRF_binding_(P_=_0.247),_Gain_of_glycosylation_at_K217_(P_=_0.3102)	0.9359	0.98631
rs1445192595	14:94381134-94381134	T	stop_gained	ENST00000448921.5:c.654G>A	ENSP00000416066.1:p.Trp218Ter	1227	654	218	W/*	tgG/tgA	-	-	-	-	-	-	-	-	-	likely_pathogenic	-	-	-	42	-	D	0.96596	0.569311	-	-	0.74932	-	8.51606	0.737497	-	0.72285	0.74766	0.31308	N	-	-	-	-	-	-	-	-	-	-
rs387906573	14:94381139-94381139	A	stop_gained,splice_region_variant	ENST00000448921.5:c.649A>T	ENSP00000416066.1:p.Lys217Ter	1222	649	217	K/*	Aaa/Taa	-	-	-	-	-	-	-	-	-	-	-	-	-	37	-	D	0.96596	0.569311	-	-	0.74634	-	3.43036	0.24848	-	0.72285	0.74766	0.34318	N	-	-	-	-	-	-	-	-	-	-
rs1555368758	14:94381141-94381142	C	splice_acceptor_variant,coding_sequence_variant	ENST00000448921.5:c.647del	-	?-1220	?-647	?-216	-	-	-	-	-	-	-	-	-	-	-	pathogenic	-	-	-	35	-	-	-	-	-	-	-	-	-	-	-	-	-	-	-	-	-	-	-	-	-	-	-	-	-
rs112661131	14:94382590-94382590	G	splice_donor_variant	ENST00000448921.5:c.646+2T>C	-	-	-	-	-	-	1.193e-05	0.000123	0	0	5.437e-05	0	0	0	0	likely_pathogenic	-	-	-	33	-	-	-	-	-	-	-	-	-	-	-	-	-	-	-	-	-	-	-	-	-	-	-	-	-
rs751235320	14:94382591-94382591	A	splice_donor_variant	ENST00000448921.5:c.646+1G>T	-	-	-	-	-	-	3.978e-06	0	0	0	0	0	8.797e-06	0	0	other,likely_pathogenic	8364536	-	-	35	-	-	-	-	-	-	-	-	-	-	-	-	-	-	-	-	-	-	-	-	-	-	-	-	-
rs756773408	14:94382592-94382592	A	missense_variant,splice_region_variant	ENST00000448921.5:c.646G>T	ENSP00000416066.1:p.Gly216Cys	1219	646	216	G/C	Ggc/Tgc	1.989e-05	0	0	0	0	0	4.399e-05	0	0	likely_pathogenic	-	deleterious(0)	probably_damaging(1)	35	deleterious(0.945)	D	0.87637	0.365078	D	0.91964	0.78074	0.91939	18.5584	0.995328	0.91589	0.91751	0.98316	0.48594	D	D	0.83675	0.34034	D	0.9792	D	0.98964	Gain_of_catalytic_residue_at_P221_(P_=_0.0039),_Gain_of_sheet_(P_=_0.0827),_Loss_of_disorder_(P_=_0.0982),_Gain_of_ubiquitination_at_K215_(P_=_0.2754),_Loss_of_MoRF_binding_(P_=_0.286)	0.92086	0.99315
rs1283743503	14:94382603-94382603	G	missense_variant	ENST00000448921.5:c.635T>C	ENSP00000416066.1:p.Ile212Thr	1208	635	212	I/T	aTc/aCc	-	-	-	-	-	-	-	-	-	-	-	deleterious(0)	probably_damaging(0.998)	26	deleterious(0.919)	D	0.84633	0.322247	D	0.81696	0.84772	0.89298	5.71129	0.555857	0.86077	0.38718	0.74766	0.39109	N	D	0.61302	0.35891	D	0.94182	D	0.94232	Gain_of_catalytic_residue_at_N210_(P_=_0.0019),_Loss_of_stability_(P_=_0.0189),_Gain_of_phosphorylation_at_I212_(P_=_0.0977),_Gain_of_sheet_(P_=_0.1539),_Gain_of_ubiquitination_at_K217_(P_=_0.2754)	0.86192	0.95479
rs749944428	14:94382604-94382604	C	missense_variant	ENST00000448921.5:c.634A>G	ENSP00000416066.1:p.Ile212Val	1207	634	212	I/V	Atc/Gtc	3.977e-06	0	0	0	0	0	8.792e-06	0	0	-	-	tolerated(0.1)	benign(0.436)	22.3	neutral(0.428)	T	0.44234	-0.0513965	D	0.32709	0.77005	0.57186	2.50892	0.0420671	0.84122	0.36801	0.74766	0.39109	N	D	0.49152	0.18523	D	0.82806	D	0.82379	Gain_of_catalytic_residue_at_N210_(P_=_0.0017),_Loss_of_stability_(P_=_0.2354),_Loss_of_MoRF_binding_(P_=_0.2945),_Loss_of_sheet_(P_=_0.302),_Gain_of_ubiquitination_at_K217_(P_=_0.3213)	0.80994	0.3428
rs1206520317	14:94382606-94382606	C	missense_variant	ENST00000448921.5:c.632A>G	ENSP00000416066.1:p.Tyr211Cys	1205	632	211	Y/C	tAc/tGc	3.977e-06	0	0	0	0	0	8.792e-06	0	0	-	-	deleterious(0.03)	possibly_damaging(0.87)	25.6	deleterious(0.703)	D	0.61577	0.0760659	D	0.71729	0.70087	0.84023	2.72189	0.0969014	0.84487	0.08055	0.74766	0.21775	N	D	0.62606	0.34611	D	0.86102	T	0.81872	Gain_of_catalytic_residue_at_N210_(P_=_0.0013),_Gain_of_sheet_(P_=_0.1451),_Loss_of_stability_(P_=_0.2481),_Loss_of_MoRF_binding_(P_=_0.2944),_Gain_of_ubiquitination_at_K215_(P_=_0.333)	0.85755	0.78455
rs864622052	14:94382607-94382607	G	missense_variant	ENST00000448921.5:c.631T>C	ENSP00000416066.1:p.Tyr211His	1204	631	211	Y/H	Tac/Cac	-	-	-	-	-	-	-	-	-	likely_benign	-	deleterious(0)	probably_damaging(0.978)	29.8	deleterious(0.865)	D	0.66467	0.120962	D	0.45829	0.87661	0.85751	7.88722	0.707082	0.84195	0.56077	0.74766	0.21775	N	D	0.62085	0.36147	D	0.9143	D	0.93896	Gain_of_catalytic_residue_at_N210_(P_=_0.001),_Loss_of_stability_(P_=_0.0557),_Gain_of_sheet_(P_=_0.1451),_Gain_of_MoRF_binding_(P_=_0.2811),_Loss_of_ubiquitination_at_K215_(P_=_0.3498)	0.84955	0.83451
rs1555368958	14:94382612-94382612	G	missense_variant	ENST00000448921.5:c.626T>C	ENSP00000416066.1:p.Val209Ala	1199	626	209	V/A	gTg/gCg	-	-	-	-	-	-	-	-	-	uncertain_significance	-	tolerated(0.1)	possibly_damaging(0.763)	24	deleterious(0.569)	T	0.57999	0.0473343	D	0.7285	0.87661	0.81708	5.543	0.539849	0.87272	0.56724	0.74766	0.19257	N	D	0.62906	0.25503	D	0.90859	D	0.91009	Gain_of_catalytic_residue_at_V209_(P_=_2e-04),_Gain_of_sheet_(P_=_0.1451),_Gain_of_phosphorylation_at_T204_(P_=_0.1598),_Loss_of_stability_(P_=_0.2237),_Loss_of_MoRF_binding_(P_=_0.2781)	0.79577	0.63811
rs780562960	14:94382613-94382613	G	missense_variant	ENST00000448921.5:c.625G>C	ENSP00000416066.1:p.Val209Leu	1198	625	209	V/L	Gtg/Ctg	6.363e-05	0	0	0	0	0	0	0	0.0005226	-	-	deleterious(0.02)	benign(0.328)	22.7	deleterious(0.486)	T	0.16201	-0.233413	T	0.15914	0.65788	0.73118	2.51987	0.0450462	0.86815	0.63643	0.74766	0.19257	N	D	0.60088	0.11798	D	0.86709	D	0.87032	Gain_of_catalytic_residue_at_N210_(P_=_0.0021),_Gain_of_loop_(P_=_0.2045),_Loss_of_MoRF_binding_(P_=_0.2966),_Loss_of_sheet_(P_=_0.302),_Gain_of_phosphorylation_at_T204_(P_=_0.3058)	0.73336	0.80084
rs1201819840	14:94382621-94382621	T	missense_variant	ENST00000448921.5:c.617T>A	ENSP00000416066.1:p.Phe206Tyr	1190	617	206	F/Y	tTt/tAt	3.976e-06	0	2.891e-05	0	0	0	0	0	0	-	-	deleterious(0)	possibly_damaging(0.674)	24.8	deleterious(0.684)	T	0.52151	0.00360768	D	0.52363	0.62202	0.82891	3.62333	0.283708	0.84341	0.57857	0.74766	0.08383	N	D	0.67431	0.24934	D	0.90565	T	0.80102	Gain_of_catalytic_residue_at_D203_(P_=_0.0161),_Gain_of_phosphorylation_at_F206_(P_=_0.0287),_Loss_of_MoRF_binding_(P_=_0.3008),_Loss_of_sheet_(P_=_0.302),_Loss_of_stability_(P_=_0.5909)	0.80191	0.72352
rs1022463154	14:94382622-94382622	G	missense_variant	ENST00000448921.5:c.616T>C	ENSP00000416066.1:p.Phe206Leu	1189	616	206	F/L	Ttt/Ctt	-	-	-	-	-	-	-	-	-	-	-	tolerated(1)	benign(0.003)	8.933	neutral(0.000)	T	0.24428	-0.175364	T	0.02831	0.03529	0.50398	0.313311	-1.1649	0.79277	0.17873	0.74766	0.08383	N	T	0.37293	0.05415	T	0.36983	T	0.40149	Gain_of_catalytic_residue_at_D203_(P_=_0.0203),_Gain_of_loop_(P_=_0.2045),_Loss_of_MoRF_binding_(P_=_0.2973),_Loss_of_sheet_(P_=_0.302),_Loss_of_phosphorylation_at_T204_(P_=_0.3542)	0.76468	0.00289
rs749634278	14:94382625-94382625	T	missense_variant	ENST00000448921.5:c.613G>A	ENSP00000416066.1:p.Val205Ile	1186	613	205	V/I	Gtt/Att	3.976e-06	0	0	0	0	0	8.79e-06	0	0	-	-	tolerated(0.15)	benign(0.033)	11.85	neutral(0.242)	T	0.3766	-0.0925186	T	0.14219	0.30358	0.53163	0.981352	-0.64371	0.8397	0.31971	0.74766	0.15709	N	D	0.58377	0.04286	T	0.7979	T	0.68916	Gain_of_catalytic_residue_at_N210_(P_=_0.0021),_Gain_of_MoRF_binding_(P_=_0.2849),_Loss_of_sheet_(P_=_0.302),_Loss_of_phosphorylation_at_T204_(P_=_0.3448),_Gain_of_helix_(P_=_0.5668)	0.58507	0.43389
rs921982028	14:94382626-94382628	TGT	frameshift_variant	ENST00000448921.5:c.611_612del	ENSP00000416066.1:p.Thr204SerfsTer11	1181-1185	608-612	203-204	DT/DX	gACACA/gACA	3.976e-06	0	2.891e-05	0	0	0	0	0	0	-	-	-	-	32	-	-	-	-	-	-	-	-	-	-	-	-	-	-	-	-	-	-	-	-	-	-	-	-	-
rs933306901	14:94382629-94382629	C	missense_variant	ENST00000448921.5:c.609C>G	ENSP00000416066.1:p.Asp203Glu	1182	609	203	D/E	gaC/gaG	-	-	-	-	-	-	-	-	-	-	-	tolerated(0.16)	benign(0.052)	15.78	neutral(0.062)	T	0.34838	-0.109567	T	0.21654	0.38522	0.60954	1.43637	-0.364998	0.88611	0.5901	0.74766	0.0472	N	T	0.34674	0.04759	D	0.86821	T	0.70946	Gain_of_catalytic_residue_at_V205_(P_=_0.0826),_Loss_of_ubiquitination_at_K198_(P_=_0.0949),_Gain_of_methylation_at_K198_(P_=_0.128),_Loss_of_stability_(P_=_0.162),_Loss_of_sheet_(P_=_0.302)	0.63842	0.43825
rs768943640	14:94382633-94382633	G	missense_variant	ENST00000448921.5:c.605G>C	ENSP00000416066.1:p.Arg202Thr	1178	605	202	R/T	aGa/aCa	3.976e-06	0	0	0	0	0	0	0.0001629	0	-	-	tolerated(0.23)	benign(0.024)	8.897	neutral(0.043)	T	0.39242	-0.0828989	T	0.06052	0.1281	0.52681	0.184991	-1.33851	0.83737	0.01602	0.74766	0.01781	N	D	0.59218	0.06699	T	0.71673	T	0.57673	Gain_of_catalytic_residue_at_A207_(P_=_0.0093),_Loss_of_solvent_accessibility_(P_=_0.0435),_Loss_of_stability_(P_=_0.0852),_Loss_of_methylation_at_K198_(P_=_0.119),_Gain_of_ubiquitination_at_K198_(P_=_0.123)	0.42085	0.2393
rs768943640	14:94382633-94382633	T	missense_variant	ENST00000448921.5:c.605G>A	ENSP00000416066.1:p.Arg202Lys	1178	605	202	R/K	aGa/aAa	3.976e-06	0	0	0	0	0	8.79e-06	0	0	-	-	tolerated(0.99)	benign(0)	3.717	neutral(0.000)	T	0.25097	-0.170906	T	0.01613	0.0543	0.44796	0.0985025	-1.52525	0.8366	0.01602	0.74766	0.01781	N	D	0.50284	0.04828	T	0.59309	T	0.58882	Gain_of_ubiquitination_at_R202_(P_=_0.0219),_Gain_of_catalytic_residue_at_A207_(P_=_0.0302),_Loss_of_solvent_accessibility_(P_=_0.089),_Loss_of_stability_(P_=_0.0956),_Loss_of_methylation_at_K198_(P_=_0.1253)	0.45695	0.04423
rs1555368976	14:94382636-94382636	C	missense_variant	ENST00000448921.5:c.602A>G	ENSP00000416066.1:p.Asp201Gly	1175	602	201	D/G	gAc/gGc	-	-	-	-	-	-	-	-	-	pathogenic	-	deleterious(0.02)	benign(0.308)	20.8	deleterious(0.479)	T	0.4765	-0.028393	D	0.47183	0.34183	0.80763	0.927707	-0.680597	0.8532	0.168	0.74766	0.2002	N	D	0.61808	0.07223	D	0.83113	T	0.75032	Gain_of_catalytic_residue_at_D203_(P_=_0.0055),_Gain_of_methylation_at_K198_(P_=_0.1042),_Gain_of_ubiquitination_at_K198_(P_=_0.123),_Gain_of_MoRF_binding_(P_=_0.189),_Loss_of_sheet_(P_=_0.302)	0.79473	0.79425
rs760372645	14:94382637-94382637	T	missense_variant	ENST00000448921.5:c.601G>A	ENSP00000416066.1:p.Asp201Asn	1174	601	201	D/N	Gac/Aac	-	-	-	-	-	-	-	-	-	-	-	tolerated(0.09)	benign(0.233)	16.39	neutral(0.320)	T	0.24921	-0.172083	T	0.11728	0.6844	0.79067	0.794206	-0.774137	0.84557	0.10525	0.74766	0.2002	N	D	0.51617	0.05039	T	0.77593	T	0.68268	Gain_of_catalytic_residue_at_D203_(P_=_0.0116),_Gain_of_methylation_at_K198_(P_=_0.0663),_Loss_of_ubiquitination_at_K198_(P_=_0.0834),_Gain_of_loop_(P_=_0.2045),_Gain_of_MoRF_binding_(P_=_0.2218)	0.76912	0.35469
rs748377295	14:94382641-94382641	A	missense_variant	ENST00000448921.5:c.597G>T	ENSP00000416066.1:p.Glu199Asp	1170	597	199	E/D	gaG/gaT	1.988e-05	0	0	0	0	0	8.79e-06	0	0.0001307	-	-	tolerated(1)	benign(0)	0.001	neutral(0.000)	T	0.03043	-0.38163	T	0.02397	0.0122	0.44626	0.000839632	-2.53624	0.86216	0.00045	0.98316	0.0625	N	T	0.23869	0.04468	T	0.57374	T	0.45238	Gain_of_catalytic_residue_at_D203_(P_=_0.0072),_Loss_of_methylation_at_K198_(P_=_0.0868),_Gain_of_ubiquitination_at_K198_(P_=_0.1062),_Gain_of_phosphorylation_at_T204_(P_=_0.2347),_Loss_of_helix_(P_=_0.3949)	0.55489	0.02904
rs766034720	14:94382646-94382646	C	missense_variant	ENST00000448921.5:c.592A>G	ENSP00000416066.1:p.Lys198Glu	1165	592	198	K/E	Aag/Gag	1.988e-05	0	0	0	0	0	4.395e-05	0	0	-	31307431	tolerated(0.08)	benign(0.181)	7.289	neutral(0.317)	T	0.54024	0.0173523	T	0.17464	0.22935	0.5667	0.222666	-1.27958	0.8791	0.00133	0.74766	0.13736	N	D	0.9778	0.09802	T	0.80311	T	0.63175	Gain_of_catalytic_residue_at_D203_(P_=_0.0055),_Loss_of_ubiquitination_at_K198_(P_=_0.0218),_Loss_of_methylation_at_K198_(P_=_0.0238),_Loss_of_glycosylation_at_K198_(P_=_0.219),_Loss_of_helix_(P_=_0.2271)	0.49143	0.63355
rs368433503	14:94382651-94382651	G	missense_variant	ENST00000448921.5:c.587T>C	ENSP00000416066.1:p.Leu196Ser	1160	587	196	L/S	tTg/tCg	3.181e-05	0	0	0.0007937	0	0	0	0	0	uncertain_significance	-	deleterious(0)	probably_damaging(0.984)	23.6	deleterious(0.875)	D	0.61221	0.0730745	D	0.4718	0.86606	0.85282	2.45798	0.0281328	0.87671	0.26518	0.74766	0.22226	N	D	0.51889	0.36559	D	0.94164	D	0.86333	-	-	0.96931
rs1566756379	14:94382651-94382653	T	frameshift_variant	ENST00000448921.5:c.585_586delinsA	ENSP00000416066.1:p.Asp195GlufsTer15	1158-1159	585-586	195-196	DL/EX	gaTTtg/gaAtg	-	-	-	-	-	-	-	-	-	pathogenic	-	-	-	-	-	-	-	-	-	-	-	-	-	-	-	-	-	-	-	-	-	-	-	-	-	-	-	-	-
rs1363454506	14:94382661-94382661	C	missense_variant	ENST00000448921.5:c.577A>G	ENSP00000416066.1:p.Ile193Val	1150	577	193	I/V	Att/Gtt	3.976e-06	0	0	0	0	0	8.79e-06	0	0	-	-	deleterious(0.04)	benign(0.211)	23.2	neutral(0.369)	D	0.66614	0.122409	D	0.48462	0.77947	0.69582	3.20523	0.20448	0.90679	0.91751	0.74766	0.62929	D	D	0.64543	0.05031	D	0.90177	D	0.88615	Gain_of_catalytic_residue_at_Q190_(P_=_0.0041),_Loss_of_ubiquitination_at_K198_(P_=_0.1079),_Loss_of_methylation_at_K198_(P_=_0.1212),_Gain_of_disorder_(P_=_0.1348),_Gain_of_phosphorylation_at_T189_(P_=_0.3942)	0.86018	0.82803
rs1469794381	14:94382662-94382662	A	missense_variant	ENST00000448921.5:c.576A>T	ENSP00000416066.1:p.Lys192Asn	1149	576	192	K/N	aaA/aaT	-	-	-	-	-	-	-	-	-	-	-	deleterious(0.02)	possibly_damaging(0.861)	23.3	deleterious(0.716)	T	0.56991	0.039579	D	0.89672	0.8775	0.85312	2.3274	-0.00935213	0.86481	0.1589	0.74766	0.34057	N	D	0.55394	0.29368	D	0.91745	D	0.92357	Gain_of_catalytic_residue_at_Q190_(P_=_0.001),_Loss_of_ubiquitination_at_K192_(P_=_0.0297),_Gain_of_methylation_at_K187_(P_=_0.1115),_Loss_of_disorder_(P_=_0.2256),_Loss_of_glycosylation_at_K192_(P_=_0.3502)	0.86018	0.94936
rs1281058408	14:94382663-94382663	A	missense_variant	ENST00000448921.5:c.575A>T	ENSP00000416066.1:p.Lys192Ile	1148	575	192	K/I	aAa/aTa	-	-	-	-	-	-	-	-	-	-	-	deleterious(0.03)	probably_damaging(0.922)	26.2	deleterious(0.736)	D	0.69195	0.149223	D	0.93161	0.73572	0.86203	3.78928	0.312301	0.86888	0.38259	0.74766	0.34057	N	D	0.7737	0.39057	D	0.94203	D	0.93864	Gain_of_catalytic_residue_at_Q190_(P_=_0),_Loss_of_ubiquitination_at_K192_(P_=_0.0297),_Gain_of_methylation_at_K187_(P_=_0.0338),_Loss_of_disorder_(P_=_0.0593),_Gain_of_stability_(P_=_0.0977)	0.83025	0.97262
rs1323793141	14:94382669-94382669	G	missense_variant	ENST00000448921.5:c.569A>C	ENSP00000416066.1:p.Gln190Pro	1142	569	190	Q/P	cAa/cCa	-	-	-	-	-	-	-	-	-	-	-	deleterious(0.01)	possibly_damaging(0.896)	23.6	deleterious(0.759)	T	0.57087	0.0403132	D	0.68564	0.55503	0.80784	2.31103	-0.0142642	0.87989	0.36801	0.74766	0.31758	N	D	0.77451	0.29889	D	0.93167	D	0.93733	Gain_of_catalytic_residue_at_G188_(P_=_0.0194),_Gain_of_ubiquitination_at_K187_(P_=_0.0754),_Gain_of_phosphorylation_at_T189_(P_=_0.1107),_Gain_of_methylation_at_K187_(P_=_0.1662),_Gain_of_disorder_(P_=_0.2448)	0.65149	0.90144
rs775606044	14:94382676-94382676	T	missense_variant	ENST00000448921.5:c.562G>A	ENSP00000416066.1:p.Gly188Ser	1135	562	188	G/S	Ggt/Agt	3.976e-06	0	0	0	5.437e-05	0	0	0	0	-	-	tolerated(0.08)	benign(0.063)	13.74	neutral(0.304)	T	0.28807	-0.146844	T	0.08689	0.40222	0.50452	1.37983	-0.395719	0.83578	0.31179	0.74766	0.09139	N	D	0.65	0.0599	T	0.77002	T	0.6681	Gain_of_catalytic_residue_at_Q190_(P_=_0.0216),_Gain_of_disorder_(P_=_0.1087),_Loss_of_ubiquitination_at_K187_(P_=_0.1091),_Loss_of_methylation_at_K187_(P_=_0.1662),_Gain_of_phosphorylation_at_Y184_(P_=_0.2987)	0.6114	0.64354
rs762801939	14:94382678-94382678	C	missense_variant	ENST00000448921.5:c.560A>G	ENSP00000416066.1:p.Lys187Arg	1133	560	187	K/R	aAg/aGg	1.193e-05	0	0	0	0	0	2.637e-05	0	0	-	-	tolerated(0.12)	benign(0.042)	16.73	neutral(0.263)	T	0.44008	-0.0528856	T	0.18681	0.77192	0.61226	1.71464	-0.230449	0.84773	0.91751	0.74766	0.8433	D	D	0.57392	0.07558	D	0.83827	D	0.84942	Gain_of_catalytic_residue_at_Q190_(P_=_0.009),_Loss_of_ubiquitination_at_K187_(P_=_0.0244),_Loss_of_methylation_at_K187_(P_=_0.0393),_Loss_of_disorder_(P_=_0.103),_Gain_of_phosphorylation_at_Y184_(P_=_0.1258)	0.4356	0.54746
rs762801939	14:94382678-94382678	G	missense_variant	ENST00000448921.5:c.560A>C	ENSP00000416066.1:p.Lys187Thr	1133	560	187	K/T	aAg/aCg	3.976e-06	0	0	0	0	0	8.79e-06	0	0	-	-	deleterious(0.01)	benign(0.432)	21.6	deleterious(0.546)	T	0.56226	0.0337687	D	0.71762	0.80044	0.76946	2.05167	-0.0983649	0.84919	0.91751	0.74766	0.8433	D	D	0.76856	0.33418	D	0.87419	D	0.88459	Gain_of_catalytic_residue_at_Q190_(P_=_0.0012),_Loss_of_ubiquitination_at_K187_(P_=_0.0244),_Loss_of_methylation_at_K187_(P_=_0.0355),_Gain_of_phosphorylation_at_Y184_(P_=_0.0906),_Loss_of_disorder_(P_=_0.1)	0.56926	0.71042
rs1035710135	14:94382681-94382681	C	missense_variant	ENST00000448921.5:c.557A>G	ENSP00000416066.1:p.Glu186Gly	1130	557	186	E/G	gAg/gGg	-	-	-	-	-	-	-	-	-	-	-	deleterious(0.01)	probably_damaging(0.942)	24.5	deleterious(0.792)	D	0.63998	0.0972958	D	0.71866	0.98379	0.81669	3.51496	0.264204	0.85799	0.91751	0.74766	0.62929	D	D	0.76678	0.27902	D	0.92157	D	0.94887	Gain_of_catalytic_residue_at_Q190_(P_=_0.0015),_Loss_of_stability_(P_=_0.0514),_Loss_of_disorder_(P_=_0.1479),_Loss_of_ubiquitination_at_K187_(P_=_0.1601),_Loss_of_methylation_at_K187_(P_=_0.1623)	0.67535	0.92123
rs1271373062	14:94382682-94382682	T	missense_variant	ENST00000448921.5:c.556G>A	ENSP00000416066.1:p.Glu186Lys	1129	556	186	E/K	Gag/Aag	7.953e-06	0	5.782e-05	0	0	0	0	0	0	-	-	tolerated(0.06)	possibly_damaging(0.496)	20.7	deleterious(0.488)	T	0.35064	-0.108209	T	0.31894	0.77068	0.65327	1.6615	-0.254138	0.84628	0.45241	0.74766	0.62929	D	D	0.67341	0.05777	D	0.82786	D	0.83956	Gain_of_catalytic_residue_at_Q190_(P_=_0.0047),_Loss_of_ubiquitination_at_K187_(P_=_0.0302),_Gain_of_methylation_at_E186_(P_=_0.0411),_Gain_of_MoRF_binding_(P_=_0.0629),_Loss_of_stability_(P_=_0.1495)	0.62954	0.55033
rs147247134	14:94382685-94382685	T	missense_variant	ENST00000448921.5:c.553G>A	ENSP00000416066.1:p.Val185Met	1126	553	185	V/M	Gtg/Atg	1.193e-05	0	2.891e-05	0	0	0	1.758e-05	0	0	-	-	deleterious(0)	probably_damaging(0.973)	21.2	deleterious(0.859)	D	0.73168	0.192216	D	0.60321	0.95491	0.90681	2.9128	0.141862	0.91956	0.63387	0.74766	0.33568	N	D	0.78793	0.32389	D	0.96251	D	0.96804	-	-	0.92123
rs267606950	14:94382685-94382686	-	frameshift_variant	ENST00000448921.5:c.552del	ENSP00000416066.1:p.Tyr184Ter	1125	552	184	Y/X	taC/ta	-	-	-	-	-	-	-	-	-	pathogenic,other	3040726,25425243	-	-	3.102	-	-	-	-	-	-	-	-	-	-	-	-	-	-	-	-	-	-	-	-	-	-	-	-	-
rs199422210	14:94382686-94382686	C	stop_gained	ENST00000448921.5:c.552C>G	ENSP00000416066.1:p.Tyr184Ter	1125	552	184	Y/*	taC/taG	1.591e-05	0	0	0	0	0	3.516e-05	0	0	likely_pathogenic	18024524,2481421,3040726,18353624,25425243	-	-	24.4	-	D	0.93647	0.478495	-	-	0.12446	-	0.110481	-1.49273	-	0.00045	0.74766	0.29444	N	-	-	-	-	-	-	-	-	-	-
rs199422210	14:94382686-94382686	T	stop_gained	ENST00000448921.5:c.552C>A	ENSP00000416066.1:p.Tyr184Ter	1125	552	184	Y/*	taC/taA	3.976e-06	0	0	0	0	0	0	0	3.266e-05	-	18024524,2481421,3040726,18353624,25425243	-	-	24.1	-	D	0.94351	0.501885	-	-	0.12049	-	0.110481	-1.49273	-	0.00045	0.74766	0.29444	N	-	-	-	-	-	-	-	-	-	-
rs759578830	14:94382691-94382691	T	missense_variant	ENST00000448921.5:c.547G>A	ENSP00000416066.1:p.Asp183Asn	1120	547	183	D/N	Gat/Aat	4.374e-05	0	0	0	0	0	8.79e-06	0	0.0003266	-	30223862	tolerated(0.29)	benign(0.003)	0.792	neutral(0.029)	T	0.00799	-0.474371	T	0.02196	0.11211	0.60875	0.0843207	-1.56869	0.87591	0.04507	0.74766	0.0476	N	T	0.47226	0.04759	T	0.80849	T	0.61625	Gain_of_catalytic_residue_at_G188_(P_=_0.0634),_Loss_of_stability_(P_=_0.0811),_Gain_of_ubiquitination_at_K179_(P_=_0.1047),_Gain_of_methylation_at_K179_(P_=_0.1521),_Loss_of_disorder_(P_=_0.2195)	0.61446	0.36767
rs864622051	14:94382700-94382700	A	stop_gained	ENST00000448921.5:c.538C>T	ENSP00000416066.1:p.Gln180Ter	1111	538	180	Q/*	Cag/Tag	-	-	-	-	-	-	-	-	-	pathogenic/likely_pathogenic	25425243	-	-	35	-	D	0.96596	0.569311	-	-	0.62981	-	1.92829	-0.143278	-	0.219	0.74766	0.16149	N	-	-	-	-	-	-	-	-	-	-
rs864622051	14:94382700-94382700	C	missense_variant	ENST00000448921.5:c.538C>G	ENSP00000416066.1:p.Gln180Glu	1111	538	180	Q/E	Cag/Gag	-	-	-	-	-	-	-	-	-	likely_benign	25425243	tolerated(0.11)	benign(0.28)	12.27	neutral(0.358)	T	0.4392	-0.0534586	T	0.13327	0.22147	0.59944	0.777651	-0.785818	0.83737	0.219	0.74766	0.16149	N	D	0.58418	0.0615	T	0.77631	T	0.64915	Gain_of_disorder_(P_=_0.0792),_Gain_of_ubiquitination_at_K179_(P_=_0.0817),_Loss_of_methylation_at_K179_(P_=_0.0848),_Gain_of_phosphorylation_at_Y184_(P_=_0.1628),_Gain_of_glycosylation_at_K178_(P_=_0.3377)	0.72236	0.3428
rs1446571866	14:94382708-94382708	A	missense_variant	ENST00000448921.5:c.530C>T	ENSP00000416066.1:p.Ala177Val	1103	530	177	A/V	gCc/gTc	3.976e-06	6.152e-05	0	0	0	0	0	0	0	-	-	deleterious(0)	probably_damaging(0.998)	25.4	deleterious(0.919)	T	0.57394	0.0426575	D	0.66335	0.98022	0.80276	5.75202	0.559613	0.85613	0.91751	0.74766	0.62929	D	D	0.67504	0.32638	D	0.92797	D	0.93014	Loss_of_ubiquitination_at_K178_(P_=_0.039),_Gain_of_methylation_at_K178_(P_=_0.1014),_Loss_of_disorder_(P_=_0.1172),_Gain_of_helix_(P_=_0.2059),_Gain_of_catalytic_residue_at_D173_(P_=_0.2364)	0.85401	0.77738
rs149770048	14:94382715-94382715	T	missense_variant	ENST00000448921.5:c.523G>A	ENSP00000416066.1:p.Glu175Lys	1096	523	175	E/K	Gaa/Aaa	2.784e-05	0	8.673e-05	0	0	0	2.637e-05	0	3.266e-05	-	-	tolerated(0.27)	benign(0.051)	9.856	neutral(0.037)	T	0.32649	-0.122914	T	0.02609	0.36187	0.61399	0.605601	-0.910792	0.88689	0.10458	0.74766	0.06154	N	D	0.70873	0.07365	D	0.83489	T	0.67526	-	-	0.79425
rs1450215301	14:94382718-94382718	C	missense_variant	ENST00000448921.5:c.520A>G	ENSP00000416066.1:p.Thr174Ala	1093	520	174	T/A	Acc/Gcc	-	-	-	-	-	-	-	-	-	-	-	tolerated(0.13)	benign(0.001)	0.18	neutral(0.253)	T	0.32292	-0.125107	T	0.09027	0.02427	0.57642	0.0258703	-1.86121	0.83495	0.00045	0.74766	0.03289	N	D	0.58963	0.04745	T	0.61832	T	0.50394	Gain_of_catalytic_residue_at_N170_(P_=_0),_Loss_of_methylation_at_K179_(P_=_0.0536),_Gain_of_ubiquitination_at_K179_(P_=_0.1181),_Gain_of_helix_(P_=_0.2059),_Loss_of_disorder_(P_=_0.2313)	0.56289	0.16226
rs112030253	14:94382724-94382724	A	missense_variant	ENST00000448921.5:c.514G>T	ENSP00000416066.1:p.Gly172Trp	1087	514	172	G/W	Ggg/Tgg	0.0009066	0.000123	5.782e-05	0	0	4.619e-05	0.001257	0.001303	0.002352	uncertain_significance,conflicting_interpretations_of_pathogenicity	2309708,6162902	deleterious(0.01)	possibly_damaging(0.783)	8.006	deleterious(0.699)	T	0.06051	-0.3308	T	0.09947	0.22046	0.80125	0.312244	-1.1661	0.84267	0.02839	0.74766	0.01574	N	D	0.67424	0.24104	D	0.88174	T	0.79872	-	-	0.6921
rs112030253	14:94382724-94382724	T	missense_variant	ENST00000448921.5:c.514G>A	ENSP00000416066.1:p.Gly172Arg	1087	514	172	G/R	Ggg/Agg	0.000346	0.001661	0.0001735	0	5.437e-05	0	0.0004395	0.0004886	0	uncertain_significance,conflicting_interpretations_of_pathogenicity,other	2309708,6162902	tolerated(1)	benign(0)	0.002	neutral(0.000)	T	0.10257	-0.283919	T	0.00016	0.01947	0.43942	0.0267698	-1.85353	0.83495	0.02839	0.74766	0.01574	N	D	0.52788	0.05466	T	0.57134	T	0.58837	Gain_of_catalytic_residue_at_G172_(P_=_0.0061),_Gain_of_solvent_accessibility_(P_=_0.0306),_Gain_of_phosphorylation_at_T174_(P_=_0.1372),_Gain_of_sheet_(P_=_0.1945),_Loss_of_stability_(P_=_0.2112)	0.82741	0.02337
rs778188056	14:94382728-94382728	C	missense_variant	ENST00000448921.5:c.510C>G	ENSP00000416066.1:p.Asn170Lys	1083	510	170	N/K	aaC/aaG	1.193e-05	0	8.673e-05	0	0	0	0	0	0	-	-	deleterious(0)	possibly_damaging(0.797)	22.7	deleterious(0.744)	T	0.31679	-0.128875	D	0.60227	0.6584	0.84995	3.11162	0.185181	0.84557	0.4302	0.74766	0.22801	N	D	0.699	0.31076	D	0.9203	D	0.94868	Gain_of_catalytic_residue_at_F171_(P_=_0.0011),_Gain_of_methylation_at_N170_(P_=_0.0048),_Gain_of_ubiquitination_at_N170_(P_=_0.0211),_Gain_of_disorder_(P_=_0.075),_Gain_of_sheet_(P_=_0.0827)	0.85134	0.77738
rs747053324	14:94382736-94382736	C	missense_variant	ENST00000448921.5:c.502A>G	ENSP00000416066.1:p.Thr168Ala	1075	502	168	T/A	Act/Gct	5.169e-05	0	0.0003758	0	0	0	0	0	0	-	-	tolerated(0.09)	benign(0)	1.416	neutral(0.296)	T	0.05046	-0.345051	T	0.07085	0.07612	0.44353	0.0636427	-1.64387	0.8397	0.00384	0.74766	0.11057	N	D	0.48759	0.04719	T	0.63791	T	0.48775	Gain_of_catalytic_residue_at_N170_(P_=_0),_Gain_of_sheet_(P_=_0.0827),_Loss_of_loop_(P_=_0.2237),_Loss_of_disorder_(P_=_0.2474),_Loss_of_helix_(P_=_0.3949)	0.48486	0.08059
rs746221008	14:94382739-94382769	-	inframe_deletion	ENST00000448921.5:c.469_498del	ENSP00000416066.1:p.Asp157_Ala166del	1042-1071	469-498	157-166	DVKKLYHSEA/-	GATGTTAAAAAGTTGTACCACTCAGAAGCC/-	0	0	0	0	0	0	0	0	0	-	-	-	-	-	-	-	-	-	-	-	-	-	-	-	-	-	-	-	-	-	-	-	-	-	-	-	-	-	-
rs142942004	14:94382741-94382741	C	missense_variant	ENST00000448921.5:c.497C>G	ENSP00000416066.1:p.Ala166Gly	1070	497	166	A/G	gCc/gGc	-	-	-	-	-	-	-	-	-	-	31307431	deleterious(0)	benign(0.041)	19.42	neutral(0.447)	T	0.51631	-0.00017233	D	0.34132	0.4978	0.72534	1.62092	-0.272927	0.84919	0.34883	0.74766	0.25787	N	D	0.74411	0.29244	D	0.8603	T	0.79683	Gain_of_catalytic_residue_at_N170_(P_=_0),_Loss_of_stability_(P_=_0.0131),_Gain_of_sheet_(P_=_0.0827),_Gain_of_disorder_(P_=_0.1376),_Loss_of_helix_(P_=_0.2022)	0.82455	0.75298
rs142942004	14:94382741-94382741	T	missense_variant	ENST00000448921.5:c.497C>A	ENSP00000416066.1:p.Ala166Asp	1070	497	166	A/D	gCc/gAc	3.977e-06	6.152e-05	0	0	0	0	0	0	0	uncertain_significance	31307431	deleterious(0)	probably_damaging(0.937)	23	deleterious(0.828)	T	0.59857	0.0619427	D	0.45339	0.77947	0.84887	2.46509	0.0300877	0.85003	0.34883	0.74766	0.25787	N	D	0.76156	0.37149	D	0.91348	D	0.90708	-	-	0.92865
rs1003633145	14:94382748-94382748	G	missense_variant	ENST00000448921.5:c.490T>C	ENSP00000416066.1:p.Ser164Pro	1063	490	164	S/P	Tca/Cca	-	-	-	-	-	-	-	-	-	-	-	deleterious(0)	possibly_damaging(0.74)	22.8	deleterious(0.716)	D	0.62207	0.0814188	D	0.41672	0.73925	0.82074	1.24647	-0.472827	0.85393	0.08948	0.74766	0.13374	N	D	0.59751	0.13248	D	0.89675	T	0.81981	Gain_of_catalytic_residue_at_F167_(P_=_0.001),_Gain_of_methylation_at_K159_(P_=_0.0938),_Gain_of_ubiquitination_at_K160_(P_=_0.154),_Loss_of_helix_(P_=_0.2022),_Gain_of_loop_(P_=_0.2045)	0.87396	0.9383
rs775552836	14:94382766-94382766	A	missense_variant	ENST00000448921.5:c.472G>T	ENSP00000416066.1:p.Val158Phe	1045	472	158	V/F	Gtt/Ttt	1.193e-05	0	0	0	0.0001631	0	0	0	0	-	-	deleterious(0)	probably_damaging(0.931)	19.22	deleterious(0.822)	T	0.29988	-0.139386	D	0.35885	0.62794	0.78836	1.70332	-0.235429	0.84919	0.22224	0.74766	0.0827	N	D	0.79596	0.34524	D	0.89727	T	0.75181	Gain_of_methylation_at_K159_(P_=_0.0797),_Gain_of_ubiquitination_at_K153_(P_=_0.1084),_Loss_of_stability_(P_=_0.1856),_Loss_of_helix_(P_=_0.2022),_Gain_of_loop_(P_=_0.2045)	0.79473	0.78151
rs749118243	14:94382768-94382768	A	missense_variant	ENST00000448921.5:c.470A>T	ENSP00000416066.1:p.Asp157Val	1043	470	157	D/V	gAt/gTt	-	-	-	-	-	-	-	-	-	uncertain_significance	-	deleterious(0)	possibly_damaging(0.718)	23.9	deleterious(0.705)	D	0.63902	0.0964128	D	0.76786	0.55261	0.77858	2.06094	-0.0951295	0.84122	0.59485	0.74766	0.44522	D	D	0.61033	0.35192	D	0.89407	D	0.9037	Gain_of_methylation_at_K159_(P_=_0.0637),_Loss_of_ubiquitination_at_K153_(P_=_0.0795),_Loss_of_disorder_(P_=_0.0881),_Loss_of_helix_(P_=_0.2022),_Gain_of_MoRF_binding_(P_=_0.3532)	0.67809	0.72568
rs749118243	14:94382768-94382768	C	missense_variant	ENST00000448921.5:c.470A>G	ENSP00000416066.1:p.Asp157Gly	1043	470	157	D/G	gAt/gGt	0.0001511	0	0	0	0.002066	0	0	0	0	-	-	deleterious(0.02)	benign(0.321)	22.9	deleterious(0.484)	T	0.12213	-0.265942	T	0.23216	0.73395	0.77874	1.71007	-0.232452	0.84415	0.59485	0.74766	0.44522	D	D	0.60131	0.34824	D	0.88336	D	0.89779	Loss_of_stability_(P_=_0.0523),_Gain_of_methylation_at_K159_(P_=_0.0666),_Loss_of_ubiquitination_at_K153_(P_=_0.1453),_Gain_of_catalytic_residue_at_V158_(P_=_0.2619),_Loss_of_disorder_(P_=_0.2901)	0.68217	0.62911
rs78640395	14:94382772-94382772	A	stop_gained	ENST00000448921.5:c.466G>T	ENSP00000416066.1:p.Glu156Ter	1039	466	156	E/*	Gag/Tag	-	-	-	-	-	-	-	-	-	-	-	-	-	34	-	D	0.96596	0.569311	-	-	0.71148	-	2.89665	0.138196	-	0.47821	0.74766	0.32207	N	-	-	-	-	-	-	-	-	-	-
rs78640395	14:94382772-94382772	T	missense_variant	ENST00000448921.5:c.466G>A	ENSP00000416066.1:p.Glu156Lys	1039	466	156	E/K	Gag/Aag	7.954e-06	0.000123	0	0	0	0	0	0	0	-	-	deleterious(0.02)	benign(0.134)	17.11	neutral(0.395)	T	0.29039	-0.145373	D	0.44905	0.65788	0.76099	1.24101	-0.476108	0.87989	0.47821	0.74766	0.32207	N	D	0.51709	0.08448	D	0.85351	T	0.76735	Gain_of_MoRF_binding_(P_=_0.0314),_Loss_of_ubiquitination_at_K153_(P_=_0.0434),_Gain_of_methylation_at_E156_(P_=_0.047),_Loss_of_stability_(P_=_0.0981),_Gain_of_disorder_(P_=_0.2993)	0.57719	0.60081
rs772420922	14:94382774-94382775	AAAA	frameshift_variant	ENST00000448921.5:c.464del	ENSP00000416066.1:p.Leu155TrpfsTer55	1033-1037	460-464	154-155	FL/FX	TTTTTg/TTTTg	3.977e-06	0	0	0	0	0	0	0	3.266e-05	-	-	-	-	-	-	-	-	-	-	-	-	-	-	-	-	-	-	-	-	-	-	-	-	-	-	-	-	-	-
rs576575224	14:94382778-94382778	G	missense_variant	ENST00000448921.5:c.460T>C	ENSP00000416066.1:p.Phe154Leu	1033	460	154	F/L	Ttt/Ctt	7.954e-06	0	0	0	0	0	8.794e-06	0	3.266e-05	-	-	deleterious(0)	probably_damaging(1)	24.6	deleterious(0.945)	D	0.91034	0.420264	D	0.96192	0.97124	0.89281	8.10383	0.718027	0.94114	0.96165	0.74766	0.8433	D	D	0.71241	0.34954	D	0.97699	D	0.99067	Loss_of_methylation_at_K153_(P_=_0.031),_Gain_of_ubiquitination_at_K153_(P_=_0.0931),_Gain_of_disorder_(P_=_0.1845),_Gain_of_loop_(P_=_0.2754),_Gain_of_catalytic_residue_at_K149_(P_=_0.3743)	0.94965	0.97073
rs369060615	14:94382781-94382781	C	missense_variant	ENST00000448921.5:c.457A>G	ENSP00000416066.1:p.Lys153Glu	1030	457	153	K/E	Aag/Gag	-	-	-	-	-	-	-	-	-	uncertain_significance	-	tolerated(0.07)	benign(0.311)	15.95	neutral(0.416)	T	0.48263	-0.0241324	D	0.4346	0.80798	0.76058	1.15639	-0.528466	0.86888	0.3977	0.74766	0.2287	N	D	0.68481	0.3381	D	0.83513	T	0.74761	-	-	0.34934
rs772895093	14:94382783-94382783	C	missense_variant	ENST00000448921.5:c.455A>G	ENSP00000416066.1:p.Asp152Gly	1028	455	152	D/G	gAt/gGt	3.977e-06	0	0	0	0	0	8.793e-06	0	0	uncertain_significance	-	tolerated(0.08)	benign(0.044)	6.238	neutral(0.302)	T	0.40274	-0.0765472	T	0.16785	0.24567	0.78525	0.275008	-1.2097	0.87989	0.01354	0.74766	0.0222	N	D	0.69661	0.05972	D	0.86734	T	0.713	Loss_of_stability_(P_=_0.1084),_Gain_of_catalytic_residue_at_K149_(P_=_0.1158),_Loss_of_ubiquitination_at_K153_(P_=_0.1278),_Loss_of_methylation_at_K153_(P_=_0.1531),_Loss_of_disorder_(P_=_0.3675)	0.63695	0.82945
rs1566756972	14:94382786-94382789	A	inframe_deletion	ENST00000448921.5:c.450_452del	ENSP00000416066.1:p.Val151del	1022-1025	449-452	150-151	LV/L	cTAGTg/cTg	3.977e-06	0	0	0	0	0	0	0	3.266e-05	-	-	-	-	-	-	-	-	-	-	-	-	-	-	-	-	-	-	-	-	-	-	-	-	-	-	-	-	-	-
rs760175391	14:94382787-94382787	G	missense_variant	ENST00000448921.5:c.451G>C	ENSP00000416066.1:p.Val151Leu	1024	451	151	V/L	Gtg/Ctg	3.977e-06	0	0	0	0	0	8.793e-06	0	0	-	-	tolerated(0.97)	benign(0.003)	0.034	neutral(0.000)	T	0.34789	-0.109882	T	0.01273	0.03122	0.44732	0.195379	-1.32135	0.83327	0.06321	0.74766	0.01883	N	D	0.57148	0.04875	T	0.54404	T	0.60404	Loss_of_methylation_at_K153_(P_=_0.0701),_Loss_of_ubiquitination_at_K153_(P_=_0.1453),_Gain_of_catalytic_residue_at_E146_(P_=_0.1878),_Loss_of_stability_(P_=_0.2417),_Gain_of_helix_(P_=_0.2684)	0.54201	0.00838
rs760175391	14:94382787-94382787	T	missense_variant	ENST00000448921.5:c.451G>A	ENSP00000416066.1:p.Val151Met	1024	451	151	V/M	Gtg/Atg	-	-	-	-	-	-	-	-	-	-	-	tolerated(0.17)	benign(0.375)	1.478	neutral(0.178)	T	0.48134	-0.0250235	T	0.23526	0.51459	0.52526	0.848647	-0.735688	0.84195	0.06321	0.74766	0.01883	N	D	0.62842	0.29332	D	0.87773	T	0.77266	Gain_of_ubiquitination_at_K153_(P_=_0.1245),_Loss_of_methylation_at_K153_(P_=_0.1292),_Gain_of_catalytic_residue_at_E146_(P_=_0.1671),_Loss_of_stability_(P_=_0.2173),_Gain_of_disorder_(P_=_0.2385)	0.5078	0.59519
rs1465395828	14:94382789-94382789	G	missense_variant	ENST00000448921.5:c.449T>C	ENSP00000416066.1:p.Leu150Pro	1022	449	150	L/P	cTa/cCa	3.977e-06	0	0	0	0	0	0	0	3.266e-05	-	-	tolerated(0.14)	benign(0.022)	16.05	neutral(0.251)	D	0.74533	0.206844	T	0.23949	0.31301	0.78715	1.20287	-0.499413	0.86415	0.40864	0.74766	0.29558	N	D	0.65965	0.07242	D	0.83298	T	0.72386	Gain_of_disorder_(P_=_0.0459),_Gain_of_methylation_at_K153_(P_=_0.0484),_Loss_of_stability_(P_=_0.0692),_Gain_of_catalytic_residue_at_E146_(P_=_0.0877),_Loss_of_ubiquitination_at_K153_(P_=_0.0896)	0.9605	0.34934
rs537285845	14:94382802-94382802	T	missense_variant	ENST00000448921.5:c.436G>A	ENSP00000416066.1:p.Glu146Lys	1009	436	146	E/K	Gag/Aag	3.182e-05	0.0002461	0	0	0	0	1.759e-05	0.000163	3.266e-05	uncertain_significance	30223862	tolerated(0.35)	benign(0)	0.001	neutral(0.021)	T	0.09483	-0.291535	T	0.00075	0.0077	0.47859	0.00172733	-2.3997	0.86216	0.00045	0.74766	0.0249	N	T	0.46358	0.05229	T	0.68021	T	0.58751	Gain_of_catalytic_residue_at_L144_(P_=_0.0013),_Gain_of_ubiquitination_at_E146_(P_=_0.0351),_Gain_of_methylation_at_E146_(P_=_0.0432),_Gain_of_MoRF_binding_(P_=_0.071),_Gain_of_glycosylation_at_E146_(P_=_0.1333)	0.54846	0.08032
rs11558263	14:94382803-94382803	T	missense_variant	ENST00000448921.5:c.435C>A	ENSP00000416066.1:p.Ser145Arg	1008	435	145	S/R	agC/agA	7.955e-06	0	0	0	5.438e-05	0	8.796e-06	0	0	-	-	tolerated(0.15)	benign(0.022)	0.02	neutral(0.242)	T	0.29325	-0.143549	T	0.12567	0.1914	0.56004	0.181926	-1.34371	0.87591	0.0718	0.74766	0.0416	N	D	0.71683	0.10127	T	0.75706	T	0.64126	Gain_of_catalytic_residue_at_L144_(P_=_0.0014),_Loss_of_helix_(P_=_0.1706),_Gain_of_solvent_accessibility_(P_=_0.204),_Gain_of_loop_(P_=_0.2045),_Gain_of_ubiquitination_at_K149_(P_=_0.2244)	0.51107	0.19527
rs374198121	14:94382808-94382808	A	missense_variant	ENST00000448921.5:c.430C>T	ENSP00000416066.1:p.Leu144Phe	1003	430	144	L/F	Ctc/Ttc	3.978e-06	6.152e-05	0	0	0	0	0	0	0	-	-	deleterious(0)	possibly_damaging(0.644)	14.79	deleterious(0.670)	T	0.31352	-0.130898	T	0.2577	0.56246	0.69172	0.466841	-1.01802	0.84773	0.03227	0.74766	0.15574	N	D	0.73532	0.296	T	0.80058	T	0.71566	-	-	0.50145
rs752979989	14:94382809-94382809	C	missense_variant	ENST00000448921.5:c.429C>G	ENSP00000416066.1:p.Phe143Leu	1002	429	143	F/L	ttC/ttG	1.989e-05	0	0.0001446	0	0	0	0	0	0	-	-	deleterious(0.05)	probably_damaging(0.925)	21.7	deleterious(0.719)	T	0.49301	-0.0168538	D	0.37977	0.65633	0.85084	1.54531	-0.309162	0.86415	0.27658	0.74766	0.55875	D	D	0.70268	0.30281	D	0.93004	D	0.91333	Gain_of_catalytic_residue_at_L144_(P_=_5e-04),_Gain_of_disorder_(P_=_0.1115),_Loss_of_sheet_(P_=_0.1158),_Gain_of_helix_(P_=_0.1736),_Gain_of_loop_(P_=_0.4661)	0.86886	0.96601
rs1223975325	14:94382810-94382810	T	missense_variant	ENST00000448921.5:c.428T>A	ENSP00000416066.1:p.Phe143Tyr	1001	428	143	F/Y	tTc/tAc	-	-	-	-	-	-	-	-	-	-	-	deleterious(0)	probably_damaging(0.999)	23.4	deleterious(0.935)	D	0.63624	0.0938851	D	0.63572	0.63075	0.81391	2.46761	0.0307839	0.85542	0.92081	0.74766	0.55875	D	D	0.73645	0.34721	D	0.90225	D	0.91052	Gain_of_catalytic_residue_at_L144_(P_=_0.001),_Gain_of_helix_(P_=_0.1736),_Gain_of_disorder_(P_=_0.2449),_Loss_of_sheet_(P_=_0.302),_Gain_of_phosphorylation_at_F143_(P_=_0.4661)	0.93058	0.50365
rs757562207	14:94382822-94382822	A	missense_variant	ENST00000448921.5:c.416G>T	ENSP00000416066.1:p.Gly139Val	989	416	139	G/V	gGc/gTc	-	-	-	-	-	-	-	-	-	-	-	deleterious(0)	probably_damaging(0.998)	23.8	deleterious(0.919)	D	0.83267	0.303759	D	0.85209	0.84382	0.80563	6.11811	0.591466	0.84195	0.92081	0.98316	0.53742	D	D	0.79945	0.35776	D	0.91767	D	0.91857	Gain_of_catalytic_residue_at_N140_(P_=_0.001),_Loss_of_sheet_(P_=_0.0357),_Loss_of_disorder_(P_=_0.0509),_Gain_of_helix_(P_=_0.062),_Loss_of_loop_(P_=_0.2897)	0.92509	0.71463
rs757562207	14:94382822-94382822	G	missense_variant	ENST00000448921.5:c.416G>C	ENSP00000416066.1:p.Gly139Ala	989	416	139	G/A	gGc/gCc	3.978e-06	0	0	0	0	0	0	0	3.266e-05	-	-	deleterious(0.02)	probably_damaging(0.949)	23.5	deleterious(0.776)	T	0.6054	0.0674793	D	0.59222	0.88017	0.79941	4.63349	0.437244	0.80899	0.92081	0.98316	0.53742	D	D	0.68205	0.33781	D	0.84073	D	0.85217	Gain_of_catalytic_residue_at_N140_(P_=_0.0028),_Loss_of_disorder_(P_=_0.116),_Loss_of_sheet_(P_=_0.1398),_Gain_of_helix_(P_=_0.1736),_Loss_of_loop_(P_=_0.2897)	0.94783	0.3072
rs11558261	14:94382823-94382823	T	missense_variant	ENST00000448921.5:c.415G>A	ENSP00000416066.1:p.Gly139Ser	988	415	139	G/S	Ggc/Agc	9.149e-05	0	0	0	0	0	1.759e-05	0	0.0006859	pathogenic,other	18974877,2394452,2185272	tolerated(0.1)	probably_damaging(0.964)	23.2	deleterious(0.693)	T	0.43036	-0.0591682	D	0.53833	0.88372	0.80424	5.23875	0.508685	0.84415	0.59485	0.74766	0.53742	D	D	0.63811	0.32332	D	0.91022	D	0.91404	Gain_of_catalytic_residue_at_G139_(P_=_0.0022),_Gain_of_disorder_(P_=_0.0771),_Loss_of_sheet_(P_=_0.1398),_Gain_of_phosphorylation_at_G139_(P_=_0.2623),_Gain_of_helix_(P_=_0.2684)	0.94292	0.82582
rs768432782	14:94382828-94382828	C	missense_variant	ENST00000448921.5:c.410C>G	ENSP00000416066.1:p.Thr137Ser	983	410	137	T/S	aCc/aGc	1.591e-05	0	0	0	0	0	3.518e-05	0	0	-	-	tolerated(0.26)	benign(0.014)	14.02	neutral(0.035)	T	0.24851	-0.172538	T	0.04766	0.16301	0.5223	0.540543	-0.959674	0.83327	0.10038	0.74766	0.10722	N	T	0.45536	0.04521	T	0.62462	T	0.44458	Gain_of_catalytic_residue_at_N140_(P_=_8e-04),_Gain_of_disorder_(P_=_0.0461),_Gain_of_helix_(P_=_0.1736),_Loss_of_sheet_(P_=_0.302),_Gain_of_phosphorylation_at_T137_(P_=_0.3149)	0.59602	0.23335
rs774398845	14:94382837-94382837	G	missense_variant	ENST00000448921.5:c.401T>C	ENSP00000416066.1:p.Leu134Pro	974	401	134	L/P	cTc/cCc	-	-	-	-	-	-	-	-	-	-	-	deleterious(0.03)	possibly_damaging(0.763)	24	deleterious(0.647)	D	0.64727	0.104051	D	0.67653	0.79507	0.77456	2.24004	-0.0360125	0.8822	0.38372	0.74766	0.27171	N	D	0.73856	0.38131	D	0.87131	D	0.84107	Gain_of_catalytic_residue_at_T138_(P_=_0.0067),_Gain_of_disorder_(P_=_0.0161),_Loss_of_stability_(P_=_0.059),_Gain_of_glycosylation_at_T137_(P_=_0.1175),_Loss_of_sheet_(P_=_0.1398)	0.868	0.77586
rs1335527833	14:94382838-94382839	-	frameshift_variant	ENST00000448921.5:c.399del	ENSP00000416066.1:p.Gln133HisfsTer4	972	399	133	Q/X	caG/ca	3.978e-06	0	0	0	0	0	8.796e-06	0	0	-	-	-	-	-	-	-	-	-	-	-	-	-	-	-	-	-	-	-	-	-	-	-	-	-	-	-	-	-	-
rs1383642353	14:94382843-94382843	T	missense_variant	ENST00000448921.5:c.395G>A	ENSP00000416066.1:p.Ser132Asn	968	395	132	S/N	aGc/aAc	-	-	-	-	-	-	-	-	-	-	-	tolerated(0.82)	benign(0.003)	0.83	neutral(0.001)	T	0.214	-0.195871	T	0.13859	0.08365	0.44651	0.121913	-1.46435	0.87272	0.02576	0.74766	0.18256	N	T	0.47924	0.04548	T	0.65753	T	0.55788	Gain_of_catalytic_residue_at_T137_(P_=_0.0419),_Loss_of_disorder_(P_=_0.1629),_Loss_of_sheet_(P_=_0.302),_Gain_of_solvent_accessibility_(P_=_0.3304),_Loss_of_helix_(P_=_0.4763)	0.23313	0.08564
rs1290444588	14:94382844-94382844	C	missense_variant	ENST00000448921.5:c.394A>G	ENSP00000416066.1:p.Ser132Gly	967	394	132	S/G	Agc/Ggc	3.978e-06	0	2.891e-05	0	0	0	0	0	0	-	-	tolerated(0.36)	benign(0.009)	15.79	neutral(0.021)	T	0.31124	-0.132301	T	0.05708	0.39298	0.61272	0.723407	-0.824693	0.87352	0.25787	0.74766	0.18256	N	D	0.56514	0.04509	T	0.77821	T	0.64959	Gain_of_catalytic_residue_at_T137_(P_=_0.0252),_Gain_of_sheet_(P_=_0.1451),_Loss_of_disorder_(P_=_0.1513),_Loss_of_stability_(P_=_0.3815),_Loss_of_solvent_accessibility_(P_=_0.4011)	0.31831	0.29067
rs747867823	14:94382846-94382846	G	missense_variant	ENST00000448921.5:c.392A>C	ENSP00000416066.1:p.Asp131Ala	965	392	131	D/A	gAc/gCc	3.978e-06	0	2.891e-05	0	0	0	0	0	0	-	-	deleterious(0)	benign(0.293)	20.3	deleterious(0.535)	T	0.37706	-0.0922333	T	0.15065	0.33496	0.77237	0.680156	-0.856054	0.8822	0.26372	0.74766	0.13935	N	D	0.69574	0.05681	D	0.85043	T	0.77063	Gain_of_catalytic_residue_at_Q133_(P_=_0.0297),_Loss_of_disorder_(P_=_0.0829),_Loss_of_sheet_(P_=_0.1398),_Loss_of_solvent_accessibility_(P_=_0.3136),_Gain_of_glycosylation_at_P130_(P_=_0.4318)	0.39469	0.61839
rs756311065	14:94382853-94382853	T	missense_variant	ENST00000448921.5:c.385C>A	ENSP00000416066.1:p.Gln129Lys	958	385	129	Q/K	Cag/Aag	-	-	-	-	-	-	-	-	-	-	-	tolerated(0.54)	benign(0.012)	7.129	neutral(0.008)	T	0.01264	-0.441679	T	0.21909	0.01724	0.47658	0.0486036	-1.71267	0.83413	0.07849	0.74766	0.02391	N	D	0.48816	0.05721	T	0.71573	T	0.55996	-	-	0.0801
rs1462737580	14:94382859-94382859	C	missense_variant	ENST00000448921.5:c.379C>G	ENSP00000416066.1:p.Leu127Val	952	379	127	L/V	Ctc/Gtc	3.978e-06	6.152e-05	0	0	0	0	0	0	0	-	-	deleterious(0.02)	benign(0.325)	17.9	deleterious(0.485)	T	0.28623	-0.148013	T	0.17835	0.32547	0.78935	1.63121	-0.268111	0.86549	0.43959	0.74766	0.21597	N	D	0.61572	0.09594	D	0.848	D	0.86728	Loss_of_disorder_(P_=_0.1287),_Loss_of_stability_(P_=_0.2706),_Gain_of_catalytic_residue_at_E122_(P_=_0.4333),_Loss_of_helix_(P_=_0.4763),_Loss_of_glycosylation_at_P130_(P_=_0.6086)	0.85313	0.49984
rs709932	14:94382864-94382864	T	missense_variant	ENST00000448921.5:c.374G>A	ENSP00000416066.1:p.Arg125His	947	374	125	R/H	cGt/cAt	0.16	0.03317	0.1079	0.1621	0.2066	0.1206	0.164	0.1661	0.269	other,benign	25741868,23267696,24033266,18974877,16608528,22692763,21625484,21067581,22426792,2901226,14551891,22723858,25287719,19543057,28486562,23487758,28546746	tolerated(1)	benign(0)	0.535	neutral(0.000)	T	0.003	-0.547877	T	0.00016	0.0627	0.45214	0.0651513	-1.63774	0.8366	0.05442	0.74766	0.05775	N	-	-	0.0563	T	0.00039	T	0.07881	-	-	0.00876
rs766025736	14:94382865-94382865	A	missense_variant	ENST00000448921.5:c.373C>T	ENSP00000416066.1:p.Arg125Cys	946	373	125	R/C	Cgt/Tgt	7.955e-06	6.152e-05	0	0	0	0	0	0	3.266e-05	-	-	deleterious(0.05)	possibly_damaging(0.647)	23.4	deleterious(0.573)	T	0.37657	-0.0925373	D	0.34267	0.9137	0.783	1.22307	-0.486978	0.84415	0.14334	0.74766	0.05775	N	D	0.80492	0.2602	D	0.8434	T	0.73661	Gain_of_catalytic_residue_at_E122_(P_=_0.0315),_Loss_of_disorder_(P_=_0.042),_Loss_of_solvent_accessibility_(P_=_0.0674),_Loss_of_helix_(P_=_0.4763),_Gain_of_glycosylation_at_P130_(P_=_0.5474)	0.78108	0.15224
rs1479870890	14:94382876-94382876	C	missense_variant	ENST00000448921.5:c.362A>G	ENSP00000416066.1:p.Gln121Arg	935	362	121	Q/R	cAg/cGg	3.978e-06	0	0	0	0	0	0	0	3.266e-05	-	-	tolerated(0.2)	benign(0.046)	16.55	neutral(0.052)	T	0.30864	-0.133913	T	0.01886	0.23243	0.76148	0.608706	-0.908492	0.87352	0.11093	0.74766	0.16732	N	D	0.52842	0.07016	T	0.8038	T	0.69026	Gain_of_catalytic_residue_at_Q121_(P_=_0.1339),_Loss_of_disorder_(P_=_0.2318),_Gain_of_solvent_accessibility_(P_=_0.3819),_Gain_of_methylation_at_Q121_(P_=_0.5238),_Gain_of_MoRF_binding_(P_=_0.7277)	0.66144	0.38264
rs749295615	14:94382882-94382882	A	missense_variant	ENST00000448921.5:c.356G>T	ENSP00000416066.1:p.Gly119Val	929	356	119	G/V	gGc/gTc	3.978e-06	0	0	0	0	0	0	0	3.266e-05	likely_benign	-	deleterious(0.03)	probably_damaging(0.987)	23.3	deleterious(0.801)	T	0.53139	0.0108285	D	0.37125	0.77883	0.78036	2.05578	-0.0969201	0.84267	0.45097	0.74766	0.34414	N	D	0.77546	0.24908	D	0.91076	D	0.90943	Loss_of_disorder_(P_=_0.0487),_Gain_of_catalytic_residue_at_E122_(P_=_0.1401),_Loss_of_stability_(P_=_0.5931),_Loss_of_helix_(P_=_0.6555),_Gain_of_MoRF_binding_(P_=_0.8936)	0.79163	0.86425
rs749295615	14:94382882-94382882	G	missense_variant	ENST00000448921.5:c.356G>C	ENSP00000416066.1:p.Gly119Ala	929	356	119	G/A	gGc/gCc	7.956e-06	0	0	0	0	0	1.759e-05	0	0	-	-	tolerated(0.18)	possibly_damaging(0.559)	20.6	neutral(0.246)	T	0.52343	0.00501345	T	0.12411	0.39158	0.77457	1.48177	-0.341108	0.83893	0.45097	0.74766	0.34414	N	D	0.57609	0.06419	D	0.81392	T	0.81949	Loss_of_disorder_(P_=_0.176),_Loss_of_helix_(P_=_0.2271),_Loss_of_stability_(P_=_0.3998),_Gain_of_catalytic_residue_at_I116_(P_=_0.8156),_Loss_of_MoRF_binding_(P_=_0.9027)	0.80392	0.458
rs749295615	14:94382882-94382882	T	missense_variant	ENST00000448921.5:c.356G>A	ENSP00000416066.1:p.Gly119Asp	929	356	119	G/D	gGc/gAc	7.956e-06	0	0	0	0	0	0	0	6.533e-05	-	-	deleterious(0.01)	probably_damaging(0.999)	23.4	deleterious(0.896)	T	0.51515	-0.00100998	D	0.62732	0.89353	0.78024	2.2771	-0.0245688	0.84415	0.45097	0.74766	0.34414	N	D	0.71695	0.26238	D	0.90283	D	0.905	Gain_of_relative_solvent_accessibility_(P_=_0.1259),_Gain_of_disorder_(P_=_0.1497),_Gain_of_solvent_accessibility_(P_=_0.2291),_Loss_of_stability_(P_=_0.4608),_Gain_of_catalytic_residue_at_I116_(P_=_0.5659)	0.77678	0.7267
rs759135389	14:94382890-94382890	C	missense_variant	ENST00000448921.5:c.348C>G	ENSP00000416066.1:p.Ile116Met	921	348	116	I/M	atC/atG	7.956e-06	0	0	0	0	0	1.759e-05	0	0	uncertain_significance	-	deleterious(0.04)	possibly_damaging(0.567)	22.5	deleterious(0.543)	T	0.51688	0.00025095	T	0.25979	0.7304	0.79853	2.58671	0.0627444	0.8532	0.63643	0.74766	0.20829	N	T	0.44254	0.09501	D	0.8785	D	0.86848	Gain_of_catalytic_residue_at_I116_(P_=_0.0064),_Gain_of_disorder_(P_=_0.0492),_Loss_of_stability_(P_=_0.1958),_Loss_of_helix_(P_=_0.3949),_Gain_of_loop_(P_=_0.6993)	0.85667	0.83555
rs28931572	14:94382891-94382891	T	missense_variant	ENST00000448921.5:c.347T>A	ENSP00000416066.1:p.Ile116Asn	920	347	116	I/N	aTc/aAc	-	-	-	-	-	-	-	-	-	other,pathogenic	18974877,14985567,2185272,2807278,25425243	deleterious(0)	probably_damaging(0.982)	25.1	deleterious(0.871)	D	0.66385	0.120125	D	0.76158	0.57457	0.81528	5.20699	0.50525	0.85613	0.92081	0.74766	0.20829	N	D	0.66448	0.38576	D	0.94422	D	0.95997	Gain_of_disorder_(P_=_0.0102),_Loss_of_stability_(P_=_0.0542),_Loss_of_helix_(P_=_0.2271),_Gain_of_catalytic_residue_at_I111_(P_=_0.2901),_Gain_of_loop_(P_=_0.4661)	0.93785	0.98282
rs769217078	14:94382892-94382892	C	missense_variant	ENST00000448921.5:c.346A>G	ENSP00000416066.1:p.Ile116Val	919	346	116	I/V	Atc/Gtc	-	-	-	-	-	-	-	-	-	-	-	tolerated(0.09)	benign(0.023)	2.975	neutral(0.297)	T	0.01885	-0.413474	T	0.19203	0.04664	0.52449	0.253058	-1.23759	0.83815	0.10765	0.74766	0.20829	N	D	0.5713	0.04279	T	0.70322	T	0.58974	Gain_of_catalytic_residue_at_I111_(P_=_0.152),_Gain_of_disorder_(P_=_0.2631),_Loss_of_stability_(P_=_0.3706),_Loss_of_helix_(P_=_0.3949),_Gain_of_loop_(P_=_0.6993)	0.73695	0.30592
rs1286737525	14:94382893-94382893	A	missense_variant	ENST00000448921.5:c.345G>T	ENSP00000416066.1:p.Gln115His	918	345	115	Q/H	caG/caT	-	-	-	-	-	-	-	-	-	-	-	tolerated(0.24)	benign(0.005)	2.95	neutral(0.037)	T	0.40597	-0.0745511	T	0.08681	0.10938	0.5872	0.128516	-1.44884	0.84415	0.00099	0.74766	0.10375	N	T	0.46816	0.04681	T	0.64013	T	0.50672	Gain_of_catalytic_residue_at_E118_(P_=_0.1027),_Loss_of_disorder_(P_=_0.1997),_Loss_of_stability_(P_=_0.2675),_Loss_of_helix_(P_=_0.3949),_Gain_of_loop_(P_=_0.6993)	0.58821	0.29723
rs1466151001	14:94382897-94382897	A	missense_variant	ENST00000448921.5:c.341C>T	ENSP00000416066.1:p.Ala114Val	914	341	114	A/V	gCt/gTt	3.978e-06	0	0	0	0	0	8.794e-06	0	0	-	-	tolerated(0.05)	benign(0.367)	8.069	neutral(0.462)	T	0.4724	-0.0312173	T	0.1949	0.22194	0.78605	0.44477	-1.03659	0.84487	0.03939	0.74766	0.04748	N	D	0.67038	0.05609	D	0.85008	T	0.77854	Gain_of_catalytic_residue_at_E113_(P_=_0.0581),_Loss_of_disorder_(P_=_0.0888),_Loss_of_glycosylation_at_T109_(P_=_0.2434),_Loss_of_relative_solvent_accessibility_(P_=_0.3589),_Loss_of_helix_(P_=_0.3949)	0.5597	0.71894
rs1566757580	14:94382898-94382898	A	missense_variant	ENST00000448921.5:c.340G>T	ENSP00000416066.1:p.Ala114Ser	913	340	114	A/S	Gct/Tct	-	-	-	-	-	-	-	-	-	-	-	tolerated(0.15)	benign(0.08)	7.839	neutral(0.246)	T	0.34678	-0.110551	T	0.05546	0.19781	0.49124	0.808923	-0.763717	0.83495	0.32998	0.74766	0.04748	N	D	0.55283	0.0502	T	0.78161	T	0.62974	Gain_of_disorder_(P_=_0.0231),_Gain_of_glycosylation_at_T109_(P_=_0.1242),_Gain_of_phosphorylation_at_A114_(P_=_0.1295),_Gain_of_catalytic_residue_at_E110_(P_=_0.1552),_Loss_of_stability_(P_=_0.1985)	0.49634	0.36832
rs1566757595	14:94382899-94382899	A	missense_variant	ENST00000448921.5:c.339G>T	ENSP00000416066.1:p.Glu113Asp	912	339	113	E/D	gaG/gaT	-	-	-	-	-	-	-	-	-	uncertain_significance	-	deleterious(0.01)	benign(0.328)	19.36	deleterious(0.509)	T	0.5468	0.0222109	D	0.41364	0.58613	0.76669	1.84728	-0.174836	0.8397	0.62624	0.74766	0.43095	D	D	0.53558	0.06166	D	0.85851	D	0.8756	Gain_of_catalytic_residue_at_L108_(P_=_0.0862),_Loss_of_disorder_(P_=_0.1544),_Loss_of_glycosylation_at_T109_(P_=_0.2236),_Loss_of_helix_(P_=_0.3949),_Gain_of_phosphorylation_at_T109_(P_=_0.6383)	0.7136	0.66956
rs765628480	14:94382901-94382901	T	missense_variant	ENST00000448921.5:c.337G>A	ENSP00000416066.1:p.Glu113Lys	910	337	113	E/K	Gag/Aag	3.979e-06	0	0	0	0	0	0	0	3.267e-05	-	-	deleterious(0.04)	possibly_damaging(0.792)	23.3	deleterious(0.646)	T	0.47704	-0.0280234	D	0.32942	0.71335	0.77128	1.89606	-0.155666	0.84047	0.32427	0.74766	0.43095	D	D	0.65942	0.09797	D	0.86568	D	0.86754	Gain_of_ubiquitination_at_E113_(P_=_0.0131),_Gain_of_methylation_at_E113_(P_=_0.0369),_Gain_of_glycosylation_at_E113_(P_=_0.0482),_Gain_of_catalytic_residue_at_L108_(P_=_0.1037),_Loss_of_disorder_(P_=_0.1594)	0.72729	0.74557
rs758820515	14:94382903-94382903	A	missense_variant	ENST00000448921.5:c.335C>T	ENSP00000416066.1:p.Pro112Leu	908	335	112	P/L	cCg/cTg	1.99e-05	0	0	0	0	0	8.796e-06	0	0.0001307	-	-	tolerated(0.17)	benign(0.301)	7.592	neutral(0.152)	T	0.24257	-0.176507	T	0.13276	0.2026	0.75693	0.632484	-0.89085	0.8775	0.23918	0.74766	0.037	N	D	0.71025	0.05361	T	0.80275	T	0.67251	Loss_of_disorder_(P_=_0.0639),_Loss_of_glycosylation_at_T109_(P_=_0.0708),_Gain_of_catalytic_residue_at_N107_(P_=_0.0766),_Loss_of_helix_(P_=_0.1299),_Gain_of_stability_(P_=_0.1689)	0.65861	0.24054
rs886044322	14:94382904-94382904	A	missense_variant	ENST00000448921.5:c.334C>T	ENSP00000416066.1:p.Pro112Ser	907	334	112	P/S	Ccg/Tcg	-	-	-	-	-	-	-	-	-	uncertain_significance	-	tolerated(1)	benign(0.017)	0.002	neutral(0.001)	T	0.32289	-0.125122	T	0.02674	0.01417	0.43464	0.0229107	-1.88808	0.86216	0.0007	0.74766	0.037	N	T	0.39041	0.0487	T	0.59534	T	0.53952	Gain_of_catalytic_residue_at_L108_(P_=_0.0031),_Loss_of_glycosylation_at_T109_(P_=_0.0998),_Gain_of_disorder_(P_=_0.1548),_Gain_of_phosphorylation_at_P112_(P_=_0.3406),_Loss_of_helix_(P_=_0.3949)	0.52902	0.01781
rs886044322	14:94382904-94382904	T	missense_variant	ENST00000448921.5:c.334C>A	ENSP00000416066.1:p.Pro112Thr	907	334	112	P/T	Ccg/Acg	-	-	-	-	-	-	-	-	-	uncertain_significance	-	tolerated(0.42)	benign(0.062)	0.016	neutral(0.018)	T	0.37099	-0.0959277	T	0.22007	0.13074	0.48802	0.0490718	-1.71031	0.87272	0.0007	0.74766	0.037	N	D	0.53153	0.0539	T	0.70478	T	0.56515	Gain_of_catalytic_residue_at_E110_(P_=_0.0582),_Loss_of_glycosylation_at_T109_(P_=_0.0893),_Loss_of_disorder_(P_=_0.2162),_Loss_of_helix_(P_=_0.3949),_Gain_of_solvent_accessibility_(P_=_0.5843)	0.56129	0.10341
rs886050923	14:94382905-94382905	C	missense_variant	ENST00000448921.5:c.333T>G	ENSP00000416066.1:p.Ile111Met	906	333	111	I/M	atT/atG	3.979e-06	0	0	0	0	0	8.796e-06	0	0	uncertain_significance	-	tolerated(0.22)	benign(0.059)	0.212	neutral(0.046)	T	0.33007	-0.120706	T	0.16262	0.01592	0.53283	0.00712333	-2.12779	0.84122	0.00045	0.74766	0.07592	N	D	0.57547	0.05997	T	0.59744	T	0.5012	Gain_of_disorder_(P_=_0.0596),_Gain_of_glycosylation_at_T109_(P_=_0.1424),_Gain_of_catalytic_residue_at_I111_(P_=_0.1528),_Loss_of_helix_(P_=_0.3949),_Loss_of_stability_(P_=_0.4961)	0.52577	0.12415
rs199422213	14:94382912-94382912	A	missense_variant	ENST00000448921.5:c.326C>T	ENSP00000416066.1:p.Thr109Met	899	326	109	T/M	aCg/aTg	2.786e-05	0	0	0	5.438e-05	0	4.399e-05	0	3.268e-05	uncertain_significance,likely_pathogenic,other	9459000	deleterious(0.02)	possibly_damaging(0.853)	23	deleterious(0.712)	D	0.68712	0.144086	D	0.75871	0.89085	0.7793	2.13052	-0.0713881	0.88533	0.45527	0.74766	0.44119	N	D	0.8025	0.31578	D	0.92882	D	0.93104	Loss_of_glycosylation_at_T109_(P_=_0.054),_Gain_of_catalytic_residue_at_N107_(P_=_0.0649),_Loss_of_relative_solvent_accessibility_(P_=_0.1807),_Loss_of_disorder_(P_=_0.2036),_Loss_of_solvent_accessibility_(P_=_0.2732)	0.88644	0.93364
rs137888162	14:94382915-94382915	C	missense_variant	ENST00000448921.5:c.323T>G	ENSP00000416066.1:p.Leu108Arg	896	323	108	L/R	cTc/cGc	-	-	-	-	-	-	-	-	-	-	-	deleterious(0.02)	benign(0.063)	22.6	neutral(0.387)	D	0.62142	0.0808584	D	0.48361	0.43089	0.78853	2.29184	-0.0200753	0.84047	0.92081	0.74766	0.2715	N	D	0.6809	0.08289	D	0.82096	T	0.75986	-	-	0.80626
rs779344345	14:94382916-94382916	C	missense_variant	ENST00000448921.5:c.322C>G	ENSP00000416066.1:p.Leu108Val	895	322	108	L/V	Ctc/Gtc	-	-	-	-	-	-	-	-	-	-	-	deleterious(0.03)	benign(0.009)	16.8	neutral(0.365)	T	0.06671	-0.322798	D	0.35063	0.24336	0.76874	1.91237	-0.149366	0.84267	0.63897	0.74766	0.2715	N	D	0.66635	0.04953	D	0.87372	T	0.79462	Gain_of_catalytic_residue_at_F106_(P_=_0.0708),_Loss_of_stability_(P_=_0.1298),_Gain_of_glycosylation_at_T109_(P_=_0.1564),_Loss_of_disorder_(P_=_0.2327),_Loss_of_helix_(P_=_0.3949)	0.74874	0.86762
rs757510628	14:94382925-94382925	C	missense_variant	ENST00000448921.5:c.313A>G	ENSP00000416066.1:p.Asn105Asp	886	313	105	N/D	Aat/Gat	3.982e-06	0	2.897e-05	0	0	0	0	0	0	-	-	tolerated(0.74)	benign(0.005)	0.001	neutral(0.002)	T	0.16194	-0.233462	T	0.04147	0.09254	0.52015	0.00679784	-2.13713	0.83893	0.00045	0.74766	0.00648	N	D	0.59948	0.05334	T	0.60964	T	0.50746	Gain_of_catalytic_residue_at_E102_(P_=_0.0465),_Gain_of_helix_(P_=_0.2059),_Gain_of_disorder_(P_=_0.2156),_Loss_of_glycosylation_at_T109_(P_=_0.2712),_Gain_of_phosphorylation_at_T109_(P_=_0.4849)	0.54846	0.0507
rs1234126292	14:94382934-94382934	T	missense_variant	ENST00000448921.5:c.304G>A	ENSP00000416066.1:p.Glu102Lys	877	304	102	E/K	Gag/Aag	3.986e-06	6.152e-05	0	0	0	0	0	0	0	-	-	tolerated(0.18)	benign(0.062)	4.712	neutral(0.060)	T	0.26563	-0.161283	T	0.05687	0.37187	0.61461	0.368056	-1.10744	0.87352	0.04	0.74766	0.06623	N	D	0.72957	0.06368	T	0.79284	T	0.66434	Gain_of_ubiquitination_at_E102_(P_=_0.0203),_Gain_of_catalytic_residue_at_D98_(P_=_0.0392),_Gain_of_glycosylation_at_E102_(P_=_0.0934),_Loss_of_disorder_(P_=_0.2309),_Gain_of_methylation_at_E102_(P_=_0.2738)	0.68217	0.24966
rs1555369135	14:94382939-94382939	T	missense_variant	ENST00000448921.5:c.299T>A	ENSP00000416066.1:p.Ile100Asn	872	299	100	I/N	aTc/aAc	-	-	-	-	-	-	-	-	-	uncertain_significance	-	deleterious(0)	probably_damaging(0.998)	25.5	deleterious(0.919)	D	0.81299	0.279795	D	0.78043	0.60862	0.91048	8.1014	0.717909	0.85875	0.92081	0.74766	0.43931	D	D	0.83841	0.39908	D	0.95135	D	0.96996	Gain_of_disorder_(P_=_0.0084),_Loss_of_stability_(P_=_0.0206),_Gain_of_catalytic_residue_at_D98_(P_=_0.0265),_Gain_of_glycosylation_at_T96_(P_=_0.2249),_Gain_of_phosphorylation_at_T96_(P_=_0.2583)	0.87396	0.98322
rs1566757757	14:94382941-94382941	G	missense_variant	ENST00000448921.5:c.297A>C	ENSP00000416066.1:p.Glu99Asp	870	297	99	E/D	gaA/gaC	-	-	-	-	-	-	-	-	-	likely_benign	-	deleterious(0.01)	benign(0.32)	21.5	deleterious(0.506)	D	0.61621	0.0764349	D	0.35096	0.75837	0.79868	2.23542	-0.0374576	0.89293	0.63897	0.74766	0.38671	N	D	0.71397	0.07553	D	0.91148	D	0.92162	Gain_of_catalytic_residue_at_D98_(P_=_0.0115),_Loss_of_disorder_(P_=_0.2162),_Gain_of_phosphorylation_at_T96_(P_=_0.2706),_Loss_of_helix_(P_=_0.3949),_Loss_of_glycosylation_at_T96_(P_=_0.5415)	0.84138	0.79844
rs1566757762	14:94382945-94382945	A	missense_variant	ENST00000448921.5:c.293A>T	ENSP00000416066.1:p.Asp98Val	866	293	98	D/V	gAt/gTt	-	-	-	-	-	-	-	-	-	-	-	deleterious(0.02)	benign(0.041)	5.512	neutral(0.386)	T	0.56477	0.0356756	T	0.11539	0.07951	0.71505	0.171689	-1.36166	0.84628	0.09459	0.74766	0.11869	N	D	0.74823	0.06361	T	0.75908	T	0.66737	Gain_of_catalytic_residue_at_D95_(P_=_0.004),_Loss_of_disorder_(P_=_0.0255),_Loss_of_ubiquitination_at_K93_(P_=_0.0683),_Gain_of_helix_(P_=_0.2059),_Loss_of_loop_(P_=_0.2897)	0.6114	0.16464
rs1035193069	14:94382946-94382946	T	missense_variant	ENST00000448921.5:c.292G>A	ENSP00000416066.1:p.Asp98Asn	865	292	98	D/N	Gat/Aat	3.996e-06	6.155e-05	0	0	0	0	0	0	0	-	-	tolerated(0.15)	benign(0.001)	1.194	neutral(0.241)	T	0.11219	-0.27488	T	0.04828	0.30072	0.48126	0.319529	-1.15801	0.84415	0.14759	0.74766	0.11869	N	D	0.59757	0.04724	T	0.73811	T	0.59184	Gain_of_catalytic_residue_at_D98_(P_=_0.0088),_Loss_of_ubiquitination_at_K93_(P_=_0.0747),_Loss_of_disorder_(P_=_0.1563),_Loss_of_phosphorylation_at_T96_(P_=_0.3435),_Loss_of_helix_(P_=_0.3949)	0.56926	0.19527
rs781502220	14:94382947-94382947	C	missense_variant	ENST00000448921.5:c.291C>G	ENSP00000416066.1:p.His97Gln	864	291	97	H/Q	caC/caG	-	-	-	-	-	-	-	-	-	-	-	tolerated(0.26)	benign(0.22)	13.41	neutral(0.056)	T	0.51963	0.00225034	D	0.42276	0.17885	0.66207	1.44477	-0.360486	0.83072	0.41857	0.74766	0.15601	N	D	0.5728	0.19127	T	0.7839	T	0.65157	Gain_of_catalytic_residue_at_D95_(P_=_0.0413),_Gain_of_ubiquitination_at_K93_(P_=_0.0645),_Gain_of_disorder_(P_=_0.1916),_Gain_of_phosphorylation_at_T92_(P_=_0.251),_Gain_of_glycosylation_at_T92_(P_=_0.2849)	0.5756	0.31868
rs781502220	14:94382947-94382947	T	missense_variant	ENST00000448921.5:c.291C>A	ENSP00000416066.1:p.His97Gln	864	291	97	H/Q	caC/caA	-	-	-	-	-	-	-	-	-	-	-	tolerated(0.26)	benign(0.22)	13.31	neutral(0.056)	T	0.51963	0.00225104	D	0.42276	0.17274	0.66207	1.44477	-0.360486	0.83072	0.41857	0.74766	0.15601	N	D	0.5728	0.19127	T	0.7839	T	0.65157	Gain_of_catalytic_residue_at_D95_(P_=_0.0413),_Gain_of_ubiquitination_at_K93_(P_=_0.0645),_Gain_of_disorder_(P_=_0.1916),_Gain_of_phosphorylation_at_T92_(P_=_0.251),_Gain_of_glycosylation_at_T92_(P_=_0.2849)	0.5756	0.31868
rs1057516212	14:94382947-94382951	GTG	frameshift_variant	ENST00000448921.5:c.288_291del	ENSP00000416066.1:p.His97MetfsTer7	858-864	285-291	95-97	DTH/DX	gaCACTCAC/gaCAC	-	-	-	-	-	-	-	-	-	pathogenic	-	-	-	-	-	-	-	-	-	-	-	-	-	-	-	-	-	-	-	-	-	-	-	-	-	-	-	-	-
rs1425601743	14:94382951-94382951	A	missense_variant	ENST00000448921.5:c.287C>T	ENSP00000416066.1:p.Thr96Ile	860	287	96	T/I	aCt/aTt	-	-	-	-	-	-	-	-	-	-	-	deleterious(0)	probably_damaging(1)	24.9	deleterious(0.945)	D	0.85604	0.336536	D	0.94736	0.95892	0.92538	8.12111	0.718875	0.92307	0.92081	0.74766	0.8433	D	D	0.58216	0.33983	D	0.97568	D	0.98782	Gain_of_catalytic_residue_at_L101_(P_=_0.0021),_Loss_of_disorder_(P_=_0.0461),_Loss_of_phosphorylation_at_T92_(P_=_0.0725),_Loss_of_ubiquitination_at_K93_(P_=_0.1151),_Gain_of_helix_(P_=_0.2059)	0.92923	0.98522
rs376616935	14:94382952-94382952	C	missense_variant	ENST00000448921.5:c.286A>G	ENSP00000416066.1:p.Thr96Ala	859	286	96	T/A	Act/Gct	1.599e-05	0.0002462	0	0	0	0	0	0	0	-	-	deleterious(0)	probably_damaging(0.956)	25.6	deleterious(0.844)	D	0.73778	0.198801	D	0.4897	0.86346	0.86642	6.60281	0.62875	0.92108	0.92081	0.74766	0.8433	D	D	0.61602	0.2664	D	0.96638	D	0.97529	-	-	0.92865
rs199962756	14:94382953-94382953	T	missense_variant	ENST00000448921.5:c.285C>A	ENSP00000416066.1:p.Asp95Glu	858	285	95	D/E	gaC/gaA	-	-	-	-	-	-	-	-	-	-	-	tolerated(0.18)	benign(0.031)	12.6	neutral(0.058)	T	0.39872	-0.07904	T	0.06868	0.40049	0.53378	1.00995	-0.624292	0.87194	0.21262	0.74766	0.1315	N	T	0.46546	0.04608	T	0.77593	T	0.62232	Gain_of_catalytic_residue_at_T92_(P_=_0.0752),_Gain_of_ubiquitination_at_K93_(P_=_0.0913),_Gain_of_disorder_(P_=_0.141),_Gain_of_glycosylation_at_T92_(P_=_0.1943),_Loss_of_phosphorylation_at_T92_(P_=_0.2046)	0.39143	0.39704
rs1252210567	14:94382955-94382955	T	missense_variant	ENST00000448921.5:c.283G>A	ENSP00000416066.1:p.Asp95Asn	856	283	95	D/N	Gac/Aac	8.007e-06	0	0	0	0	0	1.77e-05	0	0	-	-	tolerated(0.19)	benign(0.012)	17.27	neutral(0.050)	T	0.36305	-0.100722	T	0.08253	0.35726	0.63974	0.979616	-0.644894	0.87038	0.23149	0.74766	0.1315	N	D	0.57603	0.05287	T	0.74032	T	0.6008	Gain_of_catalytic_residue_at_K93_(P_=_0.0031),_Loss_of_ubiquitination_at_K93_(P_=_0.0747),_Loss_of_phosphorylation_at_T92_(P_=_0.1088),_Loss_of_disorder_(P_=_0.1436),_Gain_of_glycosylation_at_T92_(P_=_0.1592)	0.41921	0.18616
rs1490133295	14:94382963-94382963	A	missense_variant	ENST00000448921.5:c.275C>T	ENSP00000416066.1:p.Thr92Ile	848	275	92	T/I	aCc/aTc	2.404e-05	0	0.0001741	0	0	0	0	0	0	-	-	deleterious(0)	probably_damaging(0.959)	24.1	deleterious(0.847)	T	0.57009	0.0397166	D	0.34085	0.92316	0.78115	3.41475	0.245552	0.87671	0.44666	0.74766	0.15504	N	D	0.78994	0.3345	D	0.92722	D	0.86315	Gain_of_catalytic_residue_at_D95_(P_=_0.0047),_Loss_of_phosphorylation_at_T92_(P_=_0.0357),_Loss_of_disorder_(P_=_0.0529),_Loss_of_ubiquitination_at_K93_(P_=_0.0613),_Loss_of_glycosylation_at_T92_(P_=_0.0835)	0.91871	0.6946
rs28931568	14:94382966-94382966	T	missense_variant	ENST00000448921.5:c.272G>A	ENSP00000416066.1:p.Gly91Glu	845	272	91	G/E	gGg/gAg	-	-	-	-	-	-	-	-	-	other,pathogenic	18974877,2696185,14985567,1967187	deleterious(0)	probably_damaging(0.999)	25.6	deleterious(0.935)	D	0.93901	0.486152	D	0.98346	0.90238	0.93661	11.0384	0.828995	0.9317	0.92081	0.74766	0.62929	D	D	0.83061	0.36081	D	0.97876	D	0.98569	Gain_of_catalytic_residue_at_A86_(P_=_0.001),_Gain_of_ubiquitination_at_K93_(P_=_0.0605),_Gain_of_disorder_(P_=_0.0818),_Gain_of_phosphorylation_at_T92_(P_=_0.2265),_Gain_of_glycosylation_at_T96_(P_=_0.2601)	0.96158	0.98666
rs564267551	14:94382969-94382969	C	missense_variant	ENST00000448921.5:c.269T>G	ENSP00000416066.1:p.Leu90Arg	842	269	90	L/R	cTg/cGg	-	-	-	-	-	-	-	-	-	-	-	deleterious(0.02)	probably_damaging(0.998)	23.5	deleterious(0.857)	D	0.75062	0.212474	D	0.81229	0.85011	0.86083	3.11267	0.185403	0.90391	0.38259	0.74766	0.37095	N	D	0.79865	0.37142	D	0.96105	D	0.94374	Gain_of_catalytic_residue_at_A86_(P_=_0.0016),_Gain_of_disorder_(P_=_0.0304),_Gain_of_methylation_at_L90_(P_=_0.0385),_Gain_of_ubiquitination_at_K93_(P_=_0.0743),_Loss_of_stability_(P_=_0.0967)	0.9372	0.98219
rs1433266173	14:94382970-94382970	C	missense_variant	ENST00000448921.5:c.268C>G	ENSP00000416066.1:p.Leu90Val	841	268	90	L/V	Ctg/Gtg	4.009e-06	0	0	0	0	0	8.862e-06	0	0	-	-	deleterious(0.01)	possibly_damaging(0.668)	22.5	deleterious(0.642)	T	0.55741	0.0301368	D	0.34367	0.84077	0.79392	1.96316	-0.13021	0.90147	0.20837	0.74766	0.37095	N	T	0.42278	0.12323	D	0.9317	D	0.92221	Gain_of_catalytic_residue_at_A86_(P_=_2e-04),_Loss_of_ubiquitination_at_K93_(P_=_0.1151),_Loss_of_stability_(P_=_0.2161),_Loss_of_disorder_(P_=_0.2203),_Gain_of_phosphorylation_at_T92_(P_=_0.2636)	0.87311	0.89398
rs1191769902	14:94382976-94382976	A	missense_variant	ENST00000448921.5:c.262C>T	ENSP00000416066.1:p.Leu88Phe	835	262	88	L/F	Ctc/Ttc	4.011e-06	0	0	0	0	0	8.863e-06	0	0	-	-	deleterious(0)	probably_damaging(0.998)	24.3	deleterious(0.919)	D	0.77708	0.240482	D	0.7297	0.90326	0.85089	3.09633	0.181971	0.90848	0.21966	0.74766	0.42254	D	D	0.64249	0.34097	D	0.95108	D	0.87539	Gain_of_catalytic_residue_at_A86_(P_=_0),_Loss_of_ubiquitination_at_K93_(P_=_0.0747),_Loss_of_disorder_(P_=_0.1978),_Gain_of_phosphorylation_at_T92_(P_=_0.2371),_Loss_of_stability_(P_=_0.2471)	0.83025	0.94097
rs1191769902	14:94382976-94382976	C	missense_variant	ENST00000448921.5:c.262C>G	ENSP00000416066.1:p.Leu88Val	835	262	88	L/V	Ctc/Gtc	4.011e-06	0	2.904e-05	0	0	0	0	0	0	-	-	tolerated(0.05)	possibly_damaging(0.896)	22.7	deleterious(0.699)	T	0.53753	0.0153576	D	0.58559	0.7015	0.7797	2.06062	-0.0952418	0.89757	0.21966	0.74766	0.42254	N	D	0.54995	0.22848	D	0.87924	T	0.78146	Gain_of_catalytic_residue_at_A86_(P_=_2e-04),_Loss_of_ubiquitination_at_K93_(P_=_0.1151),_Gain_of_phosphorylation_at_T92_(P_=_0.2439),_Loss_of_disorder_(P_=_0.2468),_Gain_of_methylation_at_K93_(P_=_0.3692)	0.8255	0.4175
rs1370857918	14:94382984-94382984	G	missense_variant	ENST00000448921.5:c.254T>C	ENSP00000416066.1:p.Phe85Ser	827	254	85	F/S	tTt/tCt	4.007e-06	0	0	0	0	0	8.86e-06	0	0	-	-	tolerated(0.07)	possibly_damaging(0.876)	25.7	deleterious(0.660)	D	0.83001	0.300437	D	0.82388	0.96281	0.85208	9.72413	0.786095	0.84842	0.96165	0.74766	0.29328	N	D	0.75203	0.3954	D	0.92575	D	0.93735	Gain_of_catalytic_residue_at_F85_(P_=_0),_Gain_of_disorder_(P_=_0.0157),_Gain_of_glycosylation_at_S89_(P_=_0.1473),_Loss_of_stability_(P_=_0.1832),_Gain_of_phosphorylation_at_S89_(P_=_0.3624)	0.83955	0.94097
rs1460874866	14:94382987-94382987	A	missense_variant	ENST00000448921.5:c.251C>T	ENSP00000416066.1:p.Ala84Val	824	251	84	A/V	gCc/gTc	4.006e-06	0	0	0	0	0	8.856e-06	0	0	-	-	deleterious(0.02)	probably_damaging(0.953)	26.8	deleterious(0.780)	D	0.68798	0.145	D	0.68995	0.96742	0.80974	6.73982	0.638404	0.87272	0.46115	0.74766	0.62929	D	D	0.80346	0.14785	D	0.91781	D	0.91378	Gain_of_catalytic_residue_at_A86_(P_=_2e-04),_Gain_of_glycosylation_at_T83_(P_=_0.3131),_Loss_of_helix_(P_=_0.4763),_Loss_of_disorder_(P_=_0.5288),_Loss_of_phosphorylation_at_S80_(P_=_0.6003)	0.83491	0.84231
rs111850950	14:94382988-94382988	T	missense_variant	ENST00000448921.5:c.250G>A	ENSP00000416066.1:p.Ala84Thr	823	250	84	A/T	Gcc/Acc	0.0002806	6.154e-05	0.000174	0	0	0.00014	0.0005139	0.0003288	0	uncertain_significance	-	deleterious(0)	probably_damaging(0.922)	26.4	deleterious(0.816)	T	0.52506	0.00620688	D	0.36883	0.97801	0.80877	7.10858	0.662725	0.87194	0.67566	0.74766	0.62929	D	D	0.62442	0.21102	D	0.92471	D	0.92612	-	-	0.69758
rs1371527797	14:94382990-94382990	C	missense_variant	ENST00000448921.5:c.248C>G	ENSP00000416066.1:p.Thr83Arg	821	248	83	T/R	aCa/aGa	4.003e-06	0	0	0	5.437e-05	0	0	0	0	-	-	deleterious(0.01)	possibly_damaging(0.688)	22.7	deleterious(0.651)	T	0.53746	0.015305	D	0.64291	0.45011	0.82439	1.79404	-0.196551	0.88143	0.23498	0.74766	0.12328	N	D	0.77926	0.2291	D	0.92621	D	0.82864	Gain_of_catalytic_residue_at_A86_(P_=_8e-04),_Gain_of_methylation_at_T83_(P_=_0.029),_Loss_of_glycosylation_at_T83_(P_=_0.0994),_Gain_of_phosphorylation_at_S80_(P_=_0.2281),_Loss_of_helix_(P_=_0.4763)	0.89289	0.86425
rs113817720	14:94382994-94382994	G	missense_variant	ENST00000448921.5:c.244G>C	ENSP00000416066.1:p.Ala82Pro	817	244	82	A/P	Gct/Cct	-	-	-	-	-	-	-	-	-	pathogenic	-	deleterious(0.01)	probably_damaging(0.935)	23.8	deleterious(0.786)	D	0.77746	0.240902	D	0.56461	0.83629	0.87767	3.94645	0.338083	0.88455	0.32523	0.74766	0.27219	N	D	0.74863	0.35288	D	0.93715	D	0.86606	Gain_of_catalytic_residue_at_A86_(P_=_2e-04),_Gain_of_glycosylation_at_T83_(P_=_0.0721),_Loss_of_stability_(P_=_0.1686),_Gain_of_loop_(P_=_0.3485),_Gain_of_phosphorylation_at_T83_(P_=_0.3566)	0.83955	0.92553
rs113817720	14:94382994-94382994	T	missense_variant	ENST00000448921.5:c.244G>A	ENSP00000416066.1:p.Ala82Thr	817	244	82	A/T	Gct/Act	0.0001403	0	0.0004347	0.001632	0	0	8.861e-06	0.0003287	3.312e-05	uncertain_significance	-	tolerated(0.09)	benign(0.033)	18.32	neutral(0.298)	T	0.20594	-0.201466	T	0.08137	0.67687	0.61535	1.9943	-0.118812	0.87989	0.32523	0.74766	0.27219	N	D	0.57148	0.07511	T	0.79416	T	0.71363	Gain_of_catalytic_residue_at_A86_(P_=_2e-04),_Gain_of_glycosylation_at_A82_(P_=_0.0404),_Gain_of_loop_(P_=_0.3485),_Loss_of_sheet_(P_=_0.3635),_Loss_of_stability_(P_=_0.4295)	0.73216	0.49092
rs777478364	14:94382999-94382999	T	missense_variant	ENST00000448921.5:c.239G>A	ENSP00000416066.1:p.Ser80Asn	812	239	80	S/N	aGc/aAc	7.999e-06	0	0	0	0	0	0	0	6.592e-05	-	-	deleterious(0.04)	possibly_damaging(0.632)	25.4	deleterious(0.570)	T	0.53551	0.0138627	D	0.75852	0.62247	0.87464	5.88211	0.57132	0.91696	0.47196	0.74766	0.55875	D	D	0.83063	0.26382	D	0.95563	D	0.96002	Gain_of_catalytic_residue_at_S80_(P_=_2e-04),_Gain_of_glycosylation_at_S77_(P_=_0.1539),_Loss_of_sheet_(P_=_0.3635),_Loss_of_disorder_(P_=_0.4693),_Loss_of_helix_(P_=_0.4763)	0.88562	0.95097
rs864622047	14:94383002-94383002	T	missense_variant	ENST00000448921.5:c.236T>A	ENSP00000416066.1:p.Val79Glu	809	236	79	V/E	gTg/gAg	-	-	-	-	-	-	-	-	-	uncertain_significance	-	deleterious(0)	probably_damaging(0.987)	28.6	deleterious(0.881)	D	0.89743	0.397065	D	0.792	0.51621	0.86998	8.55511	0.739261	0.85613	0.96165	0.74766	0.22485	N	D	0.69354	0.36836	D	0.9374	D	0.949	Gain_of_catalytic_residue_at_A84_(P_=_5e-04),_Gain_of_disorder_(P_=_0.0412),_Gain_of_glycosylation_at_T83_(P_=_0.0857),_Gain_of_helix_(P_=_0.2294),_Gain_of_phosphorylation_at_S80_(P_=_0.3205)	0.88887	0.92918
rs55819880	14:94383008-94383008	A	missense_variant	ENST00000448921.5:c.230C>T	ENSP00000416066.1:p.Ser77Phe	803	230	77	S/F	tCc/tTc	-	-	-	-	-	-	-	-	-	other,pathogenic	14985567,1905728,2309708,8340361,8358043,8520784,15486938,22016686	deleterious(0)	probably_damaging(1)	31	deleterious(0.945)	D	0.95674	0.548014	D	0.992	0.92925	0.9417	20.6499	1.02777	0.95561	0.96165	0.98316	0.62929	D	D	0.82026	0.34349	D	0.98725	D	0.98984	Gain_of_catalytic_residue_at_A82_(P_=_5e-04),_Loss_of_glycosylation_at_S77_(P_=_0.0516),_Loss_of_disorder_(P_=_0.0605),_Gain_of_sheet_(P_=_0.1208),_Gain_of_loop_(P_=_0.3485)	0.95939	0.99558
rs775982338	14:94383009-94383012	AGAAGA	inframe_deletion	ENST00000448921.5:c.227_229del	ENSP00000416066.1:p.Phe76del	794-802	221-229	74-77	IFFS/IFS	aTCTTCTTCTcc/aTCTTCTcc	0.0001436	6.152e-05	0.0003184	0	0.0004351	0	0.0001411	0	0	other,pathogenic	14985567,2606478,18515255,24713750,2309708,6162902,15744045,2786335,2788166,3491442,6600898,19747908,22291048,24183282,24969923,32076552	-	-	22.8	-	-	-	-	-	-	-	-	-	-	-	-	-	-	-	-	-	-	-	-	-	-	-	-	-
rs1555369172	14:94383011-94383011	G	missense_variant	ENST00000448921.5:c.227T>C	ENSP00000416066.1:p.Phe76Ser	800	227	76	F/S	tTc/tCc	-	-	-	-	-	-	-	-	-	pathogenic	-	deleterious(0)	probably_damaging(1)	32	deleterious(0.945)	D	0.90917	0.418059	D	0.91101	0.96666	0.88173	16.772	0.96358	0.86815	0.96165	0.74766	0.55875	D	D	0.75948	0.40095	D	0.96065	D	0.97836	Gain_of_disorder_(P_=_0.002),_Gain_of_catalytic_residue_at_T72_(P_=_0.0025),_Gain_of_glycosylation_at_F76_(P_=_0.1376),_Loss_of_sheet_(P_=_0.1501),_Loss_of_stability_(P_=_0.162)	0.91726	0.99052
rs1458111327	14:94383012-94383012	G	missense_variant	ENST00000448921.5:c.226T>C	ENSP00000416066.1:p.Phe76Leu	799	226	76	F/L	Ttc/Ctc	-	-	-	-	-	-	-	-	-	-	-	tolerated(0.19)	possibly_damaging(0.544)	23.8	neutral(0.234)	D	0.61613	0.0763723	D	0.87013	0.80591	0.82614	4.04087	0.352994	0.85613	0.40864	0.74766	0.55875	N	T	0.4586	0.3145	D	0.83032	T	0.80944	Gain_of_catalytic_residue_at_T72_(P_=_0.0016),_Loss_of_glycosylation_at_S77_(P_=_0.1157),_Gain_of_disorder_(P_=_0.214),_Loss_of_sheet_(P_=_0.3635),_Loss_of_helix_(P_=_0.4763)	0.87816	0.60562
rs1230465323	14:94383013-94383013	T	missense_variant	ENST00000448921.5:c.225C>A	ENSP00000416066.1:p.Phe75Leu	798	225	75	F/L	ttC/ttA	3.986e-06	0	0	0	0	0	8.816e-06	0	0	-	-	tolerated(0.33)	benign(0.248)	22.7	neutral(0.049)	D	0.6171	0.077191	D	0.32926	0.68739	0.78972	2.67365	0.0849596	0.84628	0.33285	0.74766	0.55875	N	D	0.54183	0.07588	T	0.80589	T	0.75916	Gain_of_catalytic_residue_at_T72_(P_=_0.0011),_Gain_of_disorder_(P_=_0.2071),_Loss_of_stability_(P_=_0.2144),_Loss_of_glycosylation_at_S77_(P_=_0.2234),_Gain_of_helix_(P_=_0.2684)	0.77132	0.77964
rs369966794	14:94383014-94383014	G	missense_variant	ENST00000448921.5:c.224T>C	ENSP00000416066.1:p.Phe75Ser	797	224	75	F/S	tTc/tCc	-	-	-	-	-	-	-	-	-	-	31251477	deleterious(0)	probably_damaging(1)	32	deleterious(0.945)	D	0.90522	0.410756	D	0.92037	0.96742	0.86393	12.5535	0.870719	0.85799	0.96165	0.74766	0.55875	D	D	0.72839	0.40057	D	0.94408	D	0.95855	-	-	0.99256
rs1275309068	14:94383017-94383017	T	missense_variant	ENST00000448921.5:c.221T>A	ENSP00000416066.1:p.Ile74Asn	794	221	74	I/N	aTc/aAc	3.985e-06	0	0	0	0	0	8.813e-06	0	0	-	-	deleterious(0)	probably_damaging(1)	27.3	deleterious(0.945)	D	0.82804	0.297945	D	0.91454	0.64081	0.8889	12.4494	0.868035	0.86283	0.96165	0.74766	0.53742	D	D	0.72	0.40095	D	0.95918	D	0.97592	Gain_of_catalytic_residue_at_T72_(P_=_0.0044),_Gain_of_disorder_(P_=_0.0092),_Loss_of_stability_(P_=_0.0315),_Loss_of_sheet_(P_=_0.1501),_Loss_of_glycosylation_at_S77_(P_=_0.1538)	0.9084	0.98683
rs1393875655	14:94383025-94383025	C	missense_variant	ENST00000448921.5:c.213C>G	ENSP00000416066.1:p.Ser71Arg	786	213	71	S/R	agC/agG	-	-	-	-	-	-	-	-	-	-	-	deleterious(0.05)	benign(0.015)	19.15	neutral(0.346)	T	0.52777	0.00817544	T	0.11941	0.55201	0.62039	1.31456	-0.432649	0.8775	0.34986	0.74766	0.13432	N	D	0.64547	0.05268	T	0.76245	T	0.67322	Gain_of_catalytic_residue_at_F75_(P_=_0.004),_Gain_of_solvent_accessibility_(P_=_0.0837),_Loss_of_disorder_(P_=_0.1112),_Gain_of_helix_(P_=_0.132),_Loss_of_stability_(P_=_0.2749)	0.4274	0.29674
rs11575873	14:94383027-94383027	G	missense_variant	ENST00000448921.5:c.211A>C	ENSP00000416066.1:p.Ser71Arg	784	211	71	S/R	Agc/Cgc	0.0001951	0	0.0006075	0	0	0	0.0001497	0.001305	9.81e-05	uncertain_significance	30223862	deleterious(0.05)	benign(0.015)	18.69	neutral(0.346)	T	0.15612	-0.237948	T	0.01268	0.5275	0.62039	1.25099	-0.470113	0.8775	0.3977	0.74766	0.13432	N	D	0.68935	0.05268	T	0.76949	T	0.65482	-	-	0.29674
rs199687431	14:94383032-94383032	A	missense_variant	ENST00000448921.5:c.206C>T	ENSP00000416066.1:p.Ser69Phe	779	206	69	S/F	tCc/tTc	6.768e-05	0	0	0	0	4.63e-05	0.0001409	0	0	uncertain_significance	-	deleterious(0)	probably_damaging(0.971)	25.1	deleterious(0.857)	T	0.50939	-0.00517871	D	0.53592	0.89531	0.84871	4.93746	0.474806	0.84919	0.96165	0.74766	0.31955	N	D	0.69894	0.29526	D	0.92167	D	0.86925	-	-	0.95518
rs199687431	14:94383032-94383032	T	missense_variant	ENST00000448921.5:c.206C>A	ENSP00000416066.1:p.Ser69Tyr	779	206	69	S/Y	tCc/tAc	-	-	-	-	-	-	-	-	-	-	-	deleterious(0)	possibly_damaging(0.907)	24.7	deleterious(0.805)	D	0.68103	0.137675	D	0.64482	0.66049	0.80075	4.00427	0.347263	0.84919	0.96165	0.74766	0.31955	N	D	0.64108	0.16587	D	0.90279	D	0.85215	Gain_of_catalytic_residue_at_T72_(P_=_0.0011),_Loss_of_disorder_(P_=_0.0379),_Gain_of_helix_(P_=_0.132),_Gain_of_phosphorylation_at_S69_(P_=_0.4961),_Loss_of_sheet_(P_=_0.5184)	0.67946	0.81115
rs140744031	14:94383037-94383037	C	missense_variant	ENST00000448921.5:c.201C>G	ENSP00000416066.1:p.His67Gln	774	201	67	H/Q	caC/caG	7.96e-05	0	0	0.00169	0	0	1.76e-05	0.0001631	0	-	-	tolerated(0.35)	benign(0.003)	0.738	neutral(0.021)	T	0.38302	-0.088636	T	0.04766	0.06533	0.54878	0.0292618	-1.83346	0.83157	0.00018	0.74766	0.08451	N	T	0.41292	0.04937	T	0.52131	T	0.39143	-	-	0.04846
rs864622050	14:94383039-94383039	T	missense_variant	ENST00000448921.5:c.199C>A	ENSP00000416066.1:p.His67Asn	772	199	67	H/N	Cac/Aac	-	-	-	-	-	-	-	-	-	likely_benign	-	tolerated(0.33)	benign(0.011)	9.177	neutral(0.025)	T	0.39969	-0.0784379	T	0.00576	0.07838	0.54168	0.604097	-0.911907	0.82985	0.21393	0.74766	0.08451	N	D	0.56663	0.05589	T	0.68839	T	0.5137	Gain_of_catalytic_residue_at_T72_(P_=_0.0031),_Gain_of_helix_(P_=_0.132),_Gain_of_relative_solvent_accessibility_(P_=_0.1684),_Gain_of_disorder_(P_=_0.1876),_Gain_of_solvent_accessibility_(P_=_0.4496)	0.37511	0.13296
rs769400992	14:94383041-94383041	A	missense_variant	ENST00000448921.5:c.197C>T	ENSP00000416066.1:p.Ala66Val	770	197	66	A/V	gCa/gTa	7.959e-06	6.152e-05	0	0	0	0	8.799e-06	0	0	-	-	tolerated(0.09)	benign(0.151)	14.88	neutral(0.310)	T	0.32529	-0.123642	T	0.07485	0.01106	0.58227	1.06361	-0.588438	0.84773	0.42629	0.74766	0.218	N	D	0.59569	0.06459	T	0.79674	T	0.68475	Gain_of_catalytic_residue_at_R63_(P_=_0.0135),_Gain_of_helix_(P_=_0.132),_Loss_of_disorder_(P_=_0.1569),_Gain_of_MoRF_binding_(P_=_0.5829),_Loss_of_methylation_at_R63_(P_=_0.5961)	0.73456	0.43121
rs28931569	14:94383044-94383044	G	missense_variant	ENST00000448921.5:c.194T>C	ENSP00000416066.1:p.Leu65Pro	767	194	65	L/P	cTg/cCg	4.377e-05	0	0	0	0	0	7.919e-05	0.0003263	0	other,pathogenic,likely_pathogenic	2696185,14985567,3262617	tolerated(0.19)	possibly_damaging(0.479)	20.5	neutral(0.208)	D	0.76567	0.228369	D	0.47832	0.78782	0.89328	2.03985	-0.102509	0.88377	0.61401	0.74766	0.06903	N	D	0.80926	0.38826	D	0.96365	D	0.83613	-	-	0.93784
rs763483402	14:94383047-94383047	C	missense_variant	ENST00000448921.5:c.191A>G	ENSP00000416066.1:p.Gln64Arg	764	191	64	Q/R	cAg/cGg	3.979e-06	0	0	0	0	0	8.798e-06	0	0	-	31307431	tolerated(0.56)	benign(0.04)	6.731	neutral(0.009)	T	0.40705	-0.0738703	T	0.09211	0.01226	0.63679	0.147947	-1.40687	0.84701	0.01294	0.74766	0.031	N	D	0.56396	0.05171	T	0.7355	T	0.55461	Gain_of_catalytic_residue_at_S60_(P_=_0.0907),_Loss_of_stability_(P_=_0.1219),_Gain_of_loop_(P_=_0.2045),_Gain_of_disorder_(P_=_0.2952),_Gain_of_MoRF_binding_(P_=_0.2979)	0.66564	0.38264
rs1555369198	14:94383048-94383048	T	missense_variant	ENST00000448921.5:c.190C>A	ENSP00000416066.1:p.Gln64Lys	763	190	64	Q/K	Cag/Aag	-	-	-	-	-	-	-	-	-	pathogenic	-	tolerated(0.85)	benign(0.003)	3.942	neutral(0.001)	T	0.43751	-0.0545599	T	0.07783	0.0087	0.60306	0.374317	-1.10128	0.84341	0.06787	0.74766	0.031	N	D	0.54847	0.05997	T	0.74604	T	0.57951	Loss_of_stability_(P_=_0.0295),_Gain_of_ubiquitination_at_Q64_(P_=_0.0428),_Gain_of_catalytic_residue_at_S60_(P_=_0.1292),_Gain_of_loop_(P_=_0.2045),_Loss_of_disorder_(P_=_0.2787)	0.67672	0.23975
rs764726147	14:94383050-94383050	A	missense_variant	ENST00000448921.5:c.188G>T	ENSP00000416066.1:p.Arg63Leu	761	188	63	R/L	cGc/cTc	-	-	-	-	-	-	-	-	-	likely_benign	30223862	deleterious(0)	possibly_damaging(0.775)	21.4	deleterious(0.733)	D	0.71714	0.176434	D	0.38341	0.84615	0.81965	2.03371	-0.104692	0.88767	0.35301	0.74766	0.19431	N	D	0.86433	0.31967	D	0.92815	D	0.93431	Gain_of_catalytic_residue_at_S60_(P_=_0.0047),_Gain_of_helix_(P_=_0.132),_Loss_of_disorder_(P_=_0.1787),_Loss_of_solvent_accessibility_(P_=_0.3103),_Gain_of_stability_(P_=_0.3924)	0.84411	0.84923
rs764726147	14:94383050-94383050	T	missense_variant	ENST00000448921.5:c.188G>A	ENSP00000416066.1:p.Arg63His	761	188	63	R/H	cGc/cAc	1.194e-05	0	0	0	0.0001088	0	8.801e-06	0	0	-	30223862	tolerated(0.16)	benign(0.031)	12.46	neutral(0.061)	T	0.30459	-0.136442	T	0.23092	0.57938	0.78413	1.23435	-0.480136	0.88377	0.35301	0.74766	0.19431	N	D	0.63394	0.0826	D	0.84272	T	0.81802	-	-	0.55589
rs28931570	14:94383051-94383051	A	missense_variant	ENST00000448921.5:c.187C>T	ENSP00000416066.1:p.Arg63Cys	760	187	63	R/C	Cgc/Tgc	0.001058	0.0004922	0.0004337	0	0.0002175	4.626e-05	0.00205	0.0006523	3.267e-05	pathogenic,other,likely_pathogenic,pathogenic/likely_pathogenic	18974877,25010111,2696185,10194472,1504305,2606478,3496639,16859555,17964515,18515255,21752289,22912357,24713750,26987331,27296815	deleterious(0.03)	probably_damaging(0.948)	25.9	deleterious(0.756)	T	0.53137	0.0108082	T	0.11403	0.96281	0.87392	4.05721	0.355506	0.88847	0.3215	0.74766	0.19431	N	D	0.84553	0.21972	D	0.93719	D	0.93067	-	-	0.90403
rs762321137	14:94383052-94383052	T	stop_gained	ENST00000448921.5:c.186C>A	ENSP00000416066.1:p.Tyr62Ter	759	186	62	Y/*	taC/taA	3.979e-06	0	0	0	0	0	0	0	3.267e-05	likely_pathogenic	10954248	-	-	36	-	D	0.94351	0.501885	-	-	0.6331	-	5.57533	0.542984	-	0.67293	0.74766	0.33407	N	-	-	-	-	-	-	-	-	-	-
rs864622045	14:94383058-94383058	C	missense_variant	ENST00000448921.5:c.180C>G	ENSP00000416066.1:p.Ser60Arg	753	180	60	S/R	agC/agG	-	-	-	-	-	-	-	-	-	likely_benign	-	tolerated(0.34)	benign(0.007)	5.391	neutral(0.023)	T	0.47393	-0.030164	T	0.14999	0.03773	0.54685	0.451518	-1.03081	0.83327	0.2229	0.74766	0.18027	N	D	0.61994	0.0566	T	0.69444	T	0.54065	Gain_of_catalytic_residue_at_R63_(P_=_0.1164),_Gain_of_MoRF_binding_(P_=_0.173),_Loss_of_disorder_(P_=_0.2837),_Gain_of_solvent_accessibility_(P_=_0.2987),_Gain_of_methylation_at_S60_(P_=_0.3432)	0.70075	0.2713
rs767606257	14:94383060-94383060	C	missense_variant	ENST00000448921.5:c.178A>G	ENSP00000416066.1:p.Ser60Gly	751	178	60	S/G	Agc/Ggc	3.978e-06	0	0	0	5.437e-05	0	0	0	0	-	-	tolerated(0.07)	benign(0.014)	2.23	neutral(0.320)	T	0.26911	-0.159016	T	0.07958	0.10858	0.78168	0.48498	-1.00315	0.84557	0.1841	0.74766	0.18027	N	D	0.7492	0.05209	T	0.80486	T	0.7157	Gain_of_catalytic_residue_at_R63_(P_=_0.0159),_Loss_of_disorder_(P_=_0.2293),_Loss_of_stability_(P_=_0.4686),_Gain_of_methylation_at_R63_(P_=_0.5609),_Loss_of_MoRF_binding_(P_=_0.6205)	0.72851	0.82106
rs1171282022	14:94383061-94383067	GAA	inframe_deletion	ENST00000448921.5:c.172_177del	ENSP00000416066.1:p.Ala58_Phe59del	742-750	169-177	57-59	FAF/F	TTCGCCTTC/TTC	-	-	-	-	-	-	-	-	-	-	-	-	-	-	-	-	-	-	-	-	-	-	-	-	-	-	-	-	-	-	-	-	-	-	-	-	-	-	-
rs1161984475	14:94383062-94383062	C	missense_variant	ENST00000448921.5:c.176T>G	ENSP00000416066.1:p.Phe59Cys	749	176	59	F/C	tTc/tGc	3.978e-06	0	0	0	0	0	8.795e-06	0	0	-	-	deleterious(0)	possibly_damaging(0.552)	22.9	deleterious(0.633)	D	0.67002	0.126341	D	0.46742	0.3564	0.85171	2.68009	0.0865883	0.8532	0.60425	0.74766	0.05532	N	D	0.67296	0.21814	D	0.93726	T	0.77404	Gain_of_catalytic_residue_at_R63_(P_=_0.0216),_Loss_of_stability_(P_=_0.1059),_Loss_of_disorder_(P_=_0.3995),_Loss_of_methylation_at_R63_(P_=_0.5952),_Loss_of_MoRF_binding_(P_=_0.6204)	0.85134	0.89398
rs770667932	14:94383065-94383065	C	missense_variant	ENST00000448921.5:c.173C>G	ENSP00000416066.1:p.Ala58Gly	746	173	58	A/G	gCc/gGc	-	-	-	-	-	-	-	-	-	-	-	deleterious(0.02)	benign(0.003)	16.59	neutral(0.383)	T	0.11036	-0.276553	T	0.18213	0.27526	0.79185	1.09309	-0.569114	0.86815	0.24279	0.74766	0.1736	N	T	0.47567	0.05155	D	0.84876	T	0.7834	Gain_of_catalytic_residue_at_R63_(P_=_0.0069),_Loss_of_stability_(P_=_0.0755),_Loss_of_disorder_(P_=_0.3601),_Gain_of_methylation_at_R63_(P_=_0.5785),_Gain_of_MoRF_binding_(P_=_0.6194)	0.91139	0.55503
rs149319176	14:94383066-94383066	A	missense_variant	ENST00000448921.5:c.172G>T	ENSP00000416066.1:p.Ala58Ser	745	172	58	A/S	Gcc/Tcc	1.194e-05	0	0	0	5.439e-05	0	0	0	6.535e-05	-	-	tolerated(0.06)	benign(0.13)	7.851	neutral(0.334)	T	0.37817	-0.0915766	T	0.12711	0.18374	0.69347	0.73399	-0.817052	0.86549	0.1749	0.74766	0.1736	N	D	0.55073	0.18528	D	0.83994	T	0.7626	Gain_of_catalytic_residue_at_R63_(P_=_0.0227),_Gain_of_disorder_(P_=_0.0747),_Loss_of_stability_(P_=_0.3839),_Loss_of_helix_(P_=_0.5596),_Gain_of_methylation_at_R63_(P_=_0.5745)	0.90231	0.71551
rs149319176	14:94383066-94383066	T	missense_variant	ENST00000448921.5:c.172G>A	ENSP00000416066.1:p.Ala58Thr	745	172	58	A/T	Gcc/Acc	2.785e-05	0.000123	5.782e-05	0	0	0	8.798e-06	0	6.535e-05	-	-	tolerated(0.13)	benign(0.131)	9.061	neutral(0.264)	T	0.39623	-0.080566	T	0.10218	0.22131	0.79441	0.84367	-0.739164	0.87352	0.1749	0.74766	0.1736	N	D	0.57047	0.09345	D	0.83696	T	0.76696	-	-	0.77586
rs150784949	14:94383067-94383067	T	missense_variant	ENST00000448921.5:c.171C>A	ENSP00000416066.1:p.Phe57Leu	744	171	57	F/L	ttC/ttA	3.979e-06	0	0	0	0	0	8.797e-06	0	0	-	-	tolerated(0.19)	benign(0.389)	3.064	neutral(0.174)	D	0.86596	0.351341	D	0.63649	0.26303	0.84665	0.840335	-0.741503	0.92007	0.05132	0.74766	0.8433	D	D	0.65546	0.31159	D	0.93139	D	0.89388	Gain_of_catalytic_residue_at_F57_(P_=_0.0055),_Gain_of_disorder_(P_=_0.264),_Loss_of_stability_(P_=_0.5463),_Gain_of_helix_(P_=_0.5668),_Gain_of_MoRF_binding_(P_=_0.6192)	0.90308	0.86425
rs1457464431	14:94383069-94383069	G	missense_variant	ENST00000448921.5:c.169T>C	ENSP00000416066.1:p.Phe57Leu	742	169	57	F/L	Ttc/Ctc	-	-	-	-	-	-	-	-	-	likely_pathogenic	-	tolerated(0.19)	benign(0.389)	20.7	neutral(0.174)	D	0.90867	0.417118	D	0.77326	0.40011	0.84665	3.36635	0.236315	0.92007	0.96165	0.74766	0.8433	D	D	0.58535	0.31159	D	0.94302	D	0.94293	Gain_of_catalytic_residue_at_F57_(P_=_0.0055),_Gain_of_disorder_(P_=_0.264),_Loss_of_stability_(P_=_0.5463),_Gain_of_helix_(P_=_0.5668),_Gain_of_MoRF_binding_(P_=_0.6192)	0.90308	0.86425
rs753921311	14:94383075-94383075	G	missense_variant	ENST00000448921.5:c.163G>C	ENSP00000416066.1:p.Ala55Pro	736	163	55	A/P	Gct/Cct	3.979e-06	0	0	0	0	0	8.799e-06	0	0	-	-	deleterious(0.01)	probably_damaging(0.928)	21.8	deleterious(0.781)	D	0.78662	0.250653	D	0.54079	0.82054	0.7949	2.27655	-0.0247389	0.85003	0.47504	0.74766	0.26028	N	D	0.63183	0.34164	D	0.92747	D	0.95487	Gain_of_catalytic_residue_at_P52_(P_=_0.0057),_Gain_of_disorder_(P_=_0.0477),_Gain_of_glycosylation_at_T51_(P_=_0.1338),_Loss_of_stability_(P_=_0.2383),_Gain_of_phosphorylation_at_T51_(P_=_0.3588)	0.88968	0.92918
rs753921311	14:94383075-94383075	T	missense_variant	ENST00000448921.5:c.163G>A	ENSP00000416066.1:p.Ala55Thr	736	163	55	A/T	Gct/Act	-	-	-	-	-	-	-	-	-	-	-	tolerated(0.08)	benign(0.089)	12.76	neutral(0.306)	T	0.48546	-0.0221525	T	0.25218	0.01814	0.53514	1.04133	-0.603174	0.83495	0.47504	0.74766	0.26028	N	D	0.609	0.08578	T	0.7015	T	0.67855	Gain_of_catalytic_residue_at_P52_(P_=_0.0068),_Gain_of_glycosylation_at_A55_(P_=_0.0523),_Gain_of_phosphorylation_at_T51_(P_=_0.1211),_Gain_of_disorder_(P_=_0.1241),_Loss_of_stability_(P_=_0.3794)	0.5597	0.31408
rs747300627	14:94383076-94383079	-	inframe_deletion	ENST00000448921.5:c.159_161del	ENSP00000416066.1:p.Asn53_Leu54delinsLys	732-734	159-161	53-54	NL/K	aaCCTg/aag	7.957e-06	0	0	0	0	0	1.759e-05	0	0	-	-	-	-	-	-	-	-	-	-	-	-	-	-	-	-	-	-	-	-	-	-	-	-	-	-	-	-	-	-
rs758914650	14:94383080-94383080	C	missense_variant	ENST00000448921.5:c.158A>G	ENSP00000416066.1:p.Asn53Ser	731	158	53	N/S	aAc/aGc	3.978e-06	6.152e-05	0	0	0	0	0	0	0	-	-	tolerated(0.65)	benign(0)	0.27	neutral(0.003)	T	0.01391	-0.434603	T	0.01239	0.01643	0.42447	0.0530934	-1.69052	0.86722	0.05408	0.74766	0.09045	N	D	0.62764	0.04223	T	0.7294	T	0.54956	Gain_of_catalytic_residue_at_P52_(P_=_0.0077),_Gain_of_disorder_(P_=_0.0878),_Gain_of_glycosylation_at_N53_(P_=_0.1815),_Loss_of_ubiquitination_at_K49_(P_=_0.2094),_Gain_of_methylation_at_K49_(P_=_0.2541)	0.41757	0.12706
rs944607375	14:94383083-94383083	A	missense_variant	ENST00000448921.5:c.155C>T	ENSP00000416066.1:p.Pro52Leu	728	155	52	P/L	cCc/cTc	3.978e-06	0	0	0	0	0	8.798e-06	0	0	-	31307431	deleterious(0.02)	benign(0.251)	17.23	neutral(0.409)	D	0.64034	0.0976208	T	0.26533	0.47877	0.73552	1.63671	-0.265544	0.87116	0.67015	0.74766	0.21518	N	D	0.76111	0.14248	D	0.88385	D	0.89376	-	-	0.83026
rs944607375	14:94383083-94383083	C	missense_variant	ENST00000448921.5:c.155C>G	ENSP00000416066.1:p.Pro52Arg	728	155	52	P/R	cCc/cGc	3.978e-06	0	0	0	0	0	0	0	3.266e-05	-	31307431	deleterious(0.05)	benign(0.162)	16.26	neutral(0.360)	T	0.50566	-0.00783792	T	0.3018	0.25214	0.73542	1.37729	-0.397126	0.87272	0.67015	0.74766	0.21518	N	D	0.63601	0.08203	D	0.86759	D	0.88451	Loss_of_ubiquitination_at_K49_(P_=_0.0318),_Loss_of_glycosylation_at_T51_(P_=_0.0919),_Loss_of_disorder_(P_=_0.1415),_Gain_of_solvent_accessibility_(P_=_0.1422),_Gain_of_catalytic_residue_at_A55_(P_=_0.1676)	0.59911	0.68708
rs963967922	14:94383090-94383090	C	missense_variant	ENST00000448921.5:c.148A>G	ENSP00000416066.1:p.Ile50Val	721	148	50	I/V	Atc/Gtc	-	-	-	-	-	-	-	-	-	-	-	tolerated(0.16)	benign(0.015)	6.743	neutral(0.060)	T	0.54431	0.0203584	T	0.15508	0.02911	0.42427	0.620708	-0.899565	0.87591	0.38145	0.74766	0.26612	N	D	0.59822	0.04792	D	0.83275	T	0.72454	Gain_of_methylation_at_K49_(P_=_0.063),_Gain_of_disorder_(P_=_0.1441),_Gain_of_catalytic_residue_at_P45_(P_=_0.1574),_Gain_of_phosphorylation_at_T46_(P_=_0.1718),_Gain_of_glycosylation_at_T51_(P_=_0.1773)	0.77786	0.42885
rs963967922	14:94383090-94383090	G	missense_variant	ENST00000448921.5:c.148A>C	ENSP00000416066.1:p.Ile50Leu	721	148	50	I/L	Atc/Ctc	-	-	-	-	-	-	-	-	-	-	-	tolerated(0.1)	benign(0.041)	9.9	neutral(0.289)	T	0.56124	0.0330037	T	0.26123	0.2405	0.47992	0.613555	-0.90487	0.85393	0.38145	0.74766	0.26612	N	D	0.5346	0.06482	D	0.84161	T	0.7294	Gain_of_disorder_(P_=_0.0646),_Loss_of_methylation_at_K49_(P_=_0.1493),_Gain_of_catalytic_residue_at_P45_(P_=_0.1574),_Gain_of_phosphorylation_at_T46_(P_=_0.1605),_Gain_of_helix_(P_=_0.1736)	0.74407	0.62911
rs764792979	14:94383099-94383099	G	missense_variant	ENST00000448921.5:c.139T>C	ENSP00000416066.1:p.Phe47Leu	712	139	47	F/L	Ttc/Ctc	-	-	-	-	-	-	-	-	-	-	-	tolerated(0.54)	benign(0)	0.31	neutral(0.007)	T	0.03091	-0.380556	T	0.0487	0.01997	0.45895	0.0359089	-1.78615	0.86624	0.01099	0.74766	0.05775	N	D	0.56324	0.05365	T	0.63033	T	0.54997	Gain_of_catalytic_residue_at_D43_(P_=_0),_Gain_of_disorder_(P_=_0.148),_Loss_of_phosphorylation_at_T46_(P_=_0.2),_Loss_of_helix_(P_=_0.2022),_Loss_of_methylation_at_K49_(P_=_0.2075)	0.52577	0.06538
rs1381869222	14:94383101-94383101	T	missense_variant	ENST00000448921.5:c.137C>A	ENSP00000416066.1:p.Thr46Asn	710	137	46	T/N	aCc/aAc	3.979e-06	0	0	0	0	4.62e-05	0	0	0	-	-	tolerated(0.06)	benign(0.038)	7.457	neutral(0.325)	T	0.45032	-0.0461307	T	0.16324	0.21282	0.45925	0.825782	-0.751782	0.8783	0.43823	0.74766	0.01347	U	D	0.62984	0.05423	D	0.81348	T	0.68553	Gain_of_catalytic_residue_at_D43_(P_=_0),_Loss_of_phosphorylation_at_T46_(P_=_0.0435),_Loss_of_helix_(P_=_0.0626),_Loss_of_glycosylation_at_T46_(P_=_0.0879),_Gain_of_disorder_(P_=_0.1622)	0.50944	0.16971
rs1243707738	14:94383102-94383102	C	missense_variant	ENST00000448921.5:c.136A>G	ENSP00000416066.1:p.Thr46Ala	709	136	46	T/A	Acc/Gcc	3.979e-06	0	0	0	0	0	8.801e-06	0	0	-	-	tolerated(1)	benign(0)	0.071	neutral(0.000)	T	0.34801	-0.109799	T	0.06835	0.00423	0.31219	0.0944116	-1.53728	0.87116	0.10031	0.74766	0.01347	U	D	0.59713	0.04719	T	0.55343	T	0.657	Gain_of_catalytic_residue_at_D43_(P_=_0),_Loss_of_phosphorylation_at_T46_(P_=_0.0435),_Loss_of_ubiquitination_at_K49_(P_=_0.0731),_Loss_of_glycosylation_at_T46_(P_=_0.0879),_Loss_of_disorder_(P_=_0.187)	0.51271	0.00734
rs758293405	14:94383104-94383104	A	missense_variant	ENST00000448921.5:c.134C>T	ENSP00000416066.1:p.Pro45Leu	707	134	45	P/L	cCa/cTa	1.194e-05	0	0	0	0	0	0	0	9.799e-05	-	-	tolerated(0.45)	benign(0)	1.988	neutral(0.012)	T	0.24618	-0.174088	T	0.03063	0.03248	0.49096	0.330262	-1.14639	0.86549	0.16961	0.74766	0.02161	N	T	0.39293	0.04896	T	0.7669	T	0.5588	Gain_of_catalytic_residue_at_D43_(P_=_0),_Loss_of_helix_(P_=_0.0196),_Loss_of_disorder_(P_=_0.0251),_Gain_of_loop_(P_=_0.0312),_Loss_of_ubiquitination_at_K49_(P_=_0.0731)	0.55649	0.26876
rs1322087241	14:94383105-94383105	T	missense_variant	ENST00000448921.5:c.133C>A	ENSP00000416066.1:p.Pro45Thr	706	133	45	P/T	Cca/Aca	-	-	-	-	-	-	-	-	-	-	-	tolerated(0.52)	benign(0.003)	1.338	neutral(0.009)	T	0.47434	-0.0298897	T	0.13473	0.18321	0.48615	0.345518	-1.13027	0.87194	0.04112	0.74766	0.02161	U	D	0.50487	0.05403	T	0.78407	T	0.56375	Gain_of_catalytic_residue_at_D43_(P_=_0),_Loss_of_helix_(P_=_0.0626),_Loss_of_disorder_(P_=_0.1501),_Loss_of_phosphorylation_at_T46_(P_=_0.1557),_Loss_of_ubiquitination_at_K49_(P_=_0.1808)	0.44709	0.45442
rs1214596628	14:94383106-94383106	T	missense_variant	ENST00000448921.5:c.132C>A	ENSP00000416066.1:p.His44Gln	705	132	44	H/Q	caC/caA	3.979e-06	0	0	0	5.437e-05	0	0	0	0	-	-	tolerated(0.1)	benign(0.005)	5.013	neutral(0.286)	T	0.31078	-0.132583	T	0.02546	0.09233	0.48837	0.366515	-1.10899	0.87272	0.10478	0.74766	0.03374	U	D	0.58866	0.04814	T	0.7331	T	0.56984	Gain_of_catalytic_residue_at_D41_(P_=_0.0044),_Gain_of_relative_solvent_accessibility_(P_=_0.0999),_Gain_of_solvent_accessibility_(P_=_0.1071),_Gain_of_methylation_at_K49_(P_=_0.1102),_Loss_of_ubiquitination_at_K49_(P_=_0.1268)	0.3898	0.32218
rs752646694	14:94383109-94383109	T	missense_variant	ENST00000448921.5:c.129T>A	ENSP00000416066.1:p.Asp43Glu	702	129	43	D/E	gaT/gaA	1.194e-05	0	0	0	0	0	2.641e-05	0	0	-	-	tolerated(1)	benign(0)	0.007	neutral(0.000)	T	0.26434	-0.162126	T	0.04851	0.0049	0.31463	0.0245818	-1.8725	0.86963	0.01475	0.74766	0.0473	N	T	0.39167	0.04572	T	0.54855	T	0.59512	Gain_of_catalytic_residue_at_D41_(P_=_2e-04),_Loss_of_loop_(P_=_0.1242),_Gain_of_helix_(P_=_0.1736),_Loss_of_phosphorylation_at_T46_(P_=_0.1884),_Gain_of_disorder_(P_=_0.213)	0.36698	0.01286
rs186478039	14:94383119-94383119	C	missense_variant	ENST00000448921.5:c.119A>G	ENSP00000416066.1:p.His40Arg	692	119	40	H/R	cAt/cGt	1.592e-05	0	0.0001156	0	0	0	0	0	0	-	-	tolerated(0.13)	benign(0.007)	10.2	neutral(0.253)	T	0.37198	-0.0953273	T	0.10407	0.08702	0.5172	0.699432	-0.842046	0.87194	0.34883	0.74766	0.01698	N	D	0.66325	0.05727	D	0.81173	T	0.63265	-	-	0.47622
rs138070585	14:94383123-94383123	T	missense_variant	ENST00000448921.5:c.115C>A	ENSP00000416066.1:p.His39Asn	688	115	39	H/N	Cac/Aac	2.786e-05	0	0	0	0	0	6.164e-05	0	0	uncertain_significance	-	tolerated(0.41)	benign(0.003)	0.036	neutral(0.015)	T	0.14817	-0.244208	T	0.14892	0.02061	0.41873	0.0455203	-1.72892	0.83737	0.00976	0.74766	0.00436	N	D	0.62229	0.05126	T	0.72598	T	0.57825	-	-	0.42885
rs745463238	14:94383125-94383125	A	missense_variant	ENST00000448921.5:c.113C>T	ENSP00000416066.1:p.Ser38Phe	686	113	38	S/F	tCc/tTc	2.786e-05	0	5.783e-05	0	0	0	4.403e-05	0	0	-	-	deleterious(0.01)	benign(0.322)	17.95	deleterious(0.507)	T	0.49447	-0.0158271	T	0.30056	0.496	0.71673	1.0324	-0.609177	0.8783	0.26663	0.74766	0.00162	N	D	0.54285	0.18171	D	0.89396	T	0.73195	-	-	0.48678
rs769331986	14:94383126-94383126	T	missense_variant	ENST00000448921.5:c.112T>A	ENSP00000416066.1:p.Ser38Thr	685	112	38	S/T	Tcc/Acc	3.98e-06	0	0	0	0	0	8.807e-06	0	0	-	-	tolerated(0.15)	benign(0.003)	0.038	neutral(0.241)	T	0.40769	-0.0734916	T	0.17608	0.03293	0.4458	0.0340115	-1.7989	0.87671	0.00976	0.74766	0.00162	N	D	0.48712	0.04541	T	0.78161	T	0.62853	Gain_of_catalytic_residue_at_D43_(P_=_0),_Gain_of_glycosylation_at_S38_(P_=_0.046),_Gain_of_relative_solvent_accessibility_(P_=_0.09),_Gain_of_solvent_accessibility_(P_=_0.1376),_Loss_of_phosphorylation_at_T35_(P_=_0.1455)	0.30537	0.32453
rs11558262	14:94383129-94383129	C	missense_variant	ENST00000448921.5:c.109A>G	ENSP00000416066.1:p.Thr37Ala	682	109	37	T/A	Aca/Gca	-	-	-	-	-	-	-	-	-	-	-	tolerated(1)	benign(0)	1.759	neutral(0.000)	T	0.39881	-0.0789725	T	0.02946	0.01341	0.34162	0.104249	-1.50926	0.87116	0.02351	0.74766	0.01249	N	T	0.3699	0.04735	T	0.67547	T	0.65148	Gain_of_catalytic_residue_at_D41_(P_=_0),_Loss_of_glycosylation_at_T37_(P_=_0.0175),_Loss_of_phosphorylation_at_T37_(P_=_0.0753),_Loss_of_ubiquitination_at_K34_(P_=_0.4063),_Loss_of_methylation_at_K34_(P_=_0.4207)	0.12069	0.15622
rs1158625562	14:94383131-94383131	A	missense_variant	ENST00000448921.5:c.107A>T	ENSP00000416066.1:p.Asp36Val	680	107	36	D/V	gAt/gTt	3.981e-06	0	2.892e-05	0	0	0	0	0	0	-	-	deleterious(0.03)	benign(0.374)	14.42	deleterious(0.483)	T	0.57932	0.0468136	T	0.27769	0.32146	0.71518	0.673755	-0.860678	0.87272	0.09555	0.74766	0.01326	N	D	0.58848	0.06777	D	0.82076	T	0.68571	Gain_of_catalytic_residue_at_D41_(P_=_0),_Loss_of_solvent_accessibility_(P_=_0.0544),_Loss_of_relative_solvent_accessibility_(P_=_0.0981),_Loss_of_phosphorylation_at_T35_(P_=_0.1478),_Gain_of_methylation_at_K34_(P_=_0.1756)	0.28439	0.4727
rs1374116152	14:94383135-94383135	C	missense_variant	ENST00000448921.5:c.103A>G	ENSP00000416066.1:p.Thr35Ala	676	103	35	T/A	Aca/Gca	-	-	-	-	-	-	-	-	-	-	-	tolerated(0.06)	benign(0.044)	7.403	neutral(0.325)	T	0.56208	0.0336497	T	0.1912	0.15681	0.50642	0.521916	-0.974009	0.87272	0.18179	0.74766	0.01083	N	D	0.51291	0.04785	D	0.83536	T	0.68221	Gain_of_catalytic_residue_at_H39_(P_=_0.0603),_Loss_of_glycosylation_at_T35_(P_=_0.0635),_Loss_of_phosphorylation_at_T35_(P_=_0.0705),_Loss_of_stability_(P_=_0.2642),_Loss_of_ubiquitination_at_K34_(P_=_0.4033)	0.15101	0.34509
rs864622049	14:94383136-94383136	A	missense_variant	ENST00000448921.5:c.102G>T	ENSP00000416066.1:p.Lys34Asn	675	102	34	K/N	aaG/aaT	3.981e-06	0	0	0	0	0	8.81e-06	0	0	likely_benign	-	tolerated(0.07)	benign(0.017)	5.929	neutral(0.320)	T	0.40969	-0.0722315	T	0.11496	0.24465	0.35816	0.193933	-1.32371	0.87591	0.02648	0.74766	0.00886	N	D	0.76993	0.05511	T	0.76783	T	0.6627	Loss_of_ubiquitination_at_K34_(P_=_9e-04),_Gain_of_catalytic_residue_at_H39_(P_=_0.0067),_Loss_of_glycosylation_at_K34_(P_=_0.0648),_Loss_of_phosphorylation_at_T35_(P_=_0.1898),_Loss_of_methylation_at_K34_(P_=_0.3188)	0.39794	0.37844
rs769267062	14:94383138-94383138	G	missense_variant	ENST00000448921.5:c.100A>C	ENSP00000416066.1:p.Lys34Gln	673	100	34	K/Q	Aag/Cag	3.583e-05	0	0.0002313	0	0	0	0	0.000163	0	-	-	tolerated(0.14)	benign(0.01)	12.73	neutral(0.250)	T	0.14666	-0.245409	T	0.02212	0.14734	0.33165	0.572366	-0.935651	0.87512	0.31266	0.74766	0.00886	N	D	0.72606	0.05242	T	0.80584	T	0.64441	Loss_of_ubiquitination_at_K34_(P_=_9e-04),_Gain_of_catalytic_residue_at_A31_(P_=_0.0516),_Loss_of_glycosylation_at_K34_(P_=_0.0648),_Loss_of_phosphorylation_at_T35_(P_=_0.209),_Loss_of_methylation_at_K34_(P_=_0.3188)	0.35722	0.23787
rs864622048	14:94383149-94383149	A	missense_variant	ENST00000448921.5:c.89A>T	ENSP00000416066.1:p.Asp30Val	662	89	30	D/V	gAt/gTt	-	-	-	-	-	-	-	-	-	likely_benign	-	tolerated(0.38)	benign(0.007)	6.531	neutral(0.018)	T	0.54647	0.0219638	T	0.18987	0.08986	0.49631	0.12568	-1.45544	0.87671	0.01963	0.74766	0.00162	N	T	0.47195	0.06405	T	0.76976	T	0.59174	Gain_of_catalytic_residue_at_D30_(P_=_0.0031),_Loss_of_disorder_(P_=_0.0501),_Loss_of_solvent_accessibility_(P_=_0.0907),_Loss_of_relative_solvent_accessibility_(P_=_0.1807),_Loss_of_phosphorylation_at_T35_(P_=_0.1958)	0.45367	0.50856
rs1321237081	14:94383150-94383150	T	missense_variant	ENST00000448921.5:c.88G>A	ENSP00000416066.1:p.Asp30Asn	661	88	30	D/N	Gat/Aat	3.983e-06	0	0	0	0	0	8.817e-06	0	0	-	-	tolerated(0.31)	benign(0.077)	11.13	neutral(0.033)	T	0.42298	-0.0638788	T	0.11157	0.10424	0.33471	0.732468	-0.818153	0.87272	0.14352	0.74766	0.00162	N	D	0.58588	0.04785	T	0.77303	T	0.63743	Gain_of_catalytic_residue_at_A31_(P_=_0.0524),_Loss_of_disorder_(P_=_0.1613),_Loss_of_solvent_accessibility_(P_=_0.2034),_Loss_of_phosphorylation_at_T35_(P_=_0.2081),_Gain_of_glycosylation_at_T35_(P_=_0.2646)	0.2555	0.50856
rs11558259	14:94383155-94383155	C	missense_variant	ENST00000448921.5:c.83A>G	ENSP00000416066.1:p.Gln28Arg	656	83	28	Q/R	cAg/cGg	-	-	-	-	-	-	-	-	-	-	-	tolerated(0.33)	benign(0.022)	9.809	neutral(0.025)	T	0.60236	0.0650108	T	0.2649	0.26823	0.48806	1.4092	-0.379586	0.8775	0.35301	0.74766	0.08973	N	D	0.67573	0.06534	D	0.85131	T	0.74674	Gain_of_catalytic_residue_at_A31_(P_=_0.0373),_Loss_of_disorder_(P_=_0.2068),_Gain_of_methylation_at_Q28_(P_=_0.432),_Loss_of_relative_solvent_accessibility_(P_=_0.5582),_Gain_of_sheet_(P_=_0.6509)	0.3849	0.46185
rs190231439	14:94383158-94383158	A	missense_variant	ENST00000448921.5:c.80C>T	ENSP00000416066.1:p.Pro27Leu	653	80	27	P/L	cCc/cTc	3.984e-06	0	2.892e-05	0	0	0	0	0	0	uncertain_significance	-	tolerated(0.55)	benign(0)	5.009	neutral(0.007)	T	0.36739	-0.0981076	T	0.01269	0.01566	0.33557	0.264646	-1.22263	0.87116	0.08473	0.74766	0.04882	N	T	0.47914	0.04858	T	0.70117	T	0.58647	-	-	0.10031
rs767986567	14:94383159-94383159	A	missense_variant	ENST00000448921.5:c.79C>T	ENSP00000416066.1:p.Pro27Ser	652	79	27	P/S	Ccc/Tcc	3.187e-05	0	2.892e-05	0	0	0	0	0.0001632	0.000196	-	-	tolerated(0.82)	benign(0.033)	0.302	neutral(0.002)	T	0.11416	-0.273078	T	0.04583	0.02888	0.38088	0.187039	-1.33504	0.87352	0.02543	0.74766	0.04882	N	T	0.39404	0.04821	T	0.70729	T	0.60232	Gain_of_catalytic_residue_at_S22_(P_=_0.0089),_Gain_of_phosphorylation_at_P27_(P_=_0.1227),_Gain_of_glycosylation_at_P27_(P_=_0.1438),_Gain_of_disorder_(P_=_0.155),_Loss_of_loop_(P_=_0.4412)	0.30053	0.42885
rs767986567	14:94383159-94383159	T	missense_variant	ENST00000448921.5:c.79C>A	ENSP00000416066.1:p.Pro27Thr	652	79	27	P/T	Ccc/Acc	3.984e-06	0	0	0	0	0	8.824e-06	0	0	-	-	tolerated(0.66)	benign(0.005)	0.351	neutral(0.003)	T	0.42201	-0.0645005	T	0.02116	0.07618	0.4159	0.146918	-1.40902	0.87194	0.02543	0.74766	0.04882	N	T	0.26412	0.05203	T	0.71596	T	0.58452	Gain_of_catalytic_residue_at_S22_(P_=_0.003),_Gain_of_phosphorylation_at_P27_(P_=_0.0567),_Loss_of_relative_solvent_accessibility_(P_=_0.0676),_Loss_of_solvent_accessibility_(P_=_0.0721),_Loss_of_disorder_(P_=_0.1187)	0.39469	0.42885
rs199422212	14:94383161-94383161	A	missense_variant	ENST00000448921.5:c.77A>T	ENSP00000416066.1:p.Asp26Val	650	77	26	D/V	gAt/gTt	3.984e-06	0	2.892e-05	0	0	0	0	0	0	-	2240842	deleterious(0.03)	benign(0.077)	13.03	neutral(0.370)	T	0.4629	-0.0376996	T	0.19749	0.20027	0.70599	0.396125	-1.08037	0.87038	0.02768	0.74766	0.07679	N	D	0.64409	0.06815	T	0.80301	T	0.69739	Gain_of_catalytic_residue_at_S22_(P_=_0.0107),_Loss_of_disorder_(P_=_0.0332),_Loss_of_glycosylation_at_S22_(P_=_0.2185),_Gain_of_loop_(P_=_0.4248),_Loss_of_solvent_accessibility_(P_=_0.4995)	0.48486	0.57729
rs199422212	14:94383161-94383161	G	missense_variant	ENST00000448921.5:c.77A>C	ENSP00000416066.1:p.Asp26Ala	650	77	26	D/A	gAt/gCt	-	-	-	-	-	-	-	-	-	benign,other	2240842	tolerated(0.06)	benign(0.059)	8.412	neutral(0.327)	T	0.5178	0.000917872	T	0.2579	0.18234	0.71844	0.371218	-1.10432	0.87272	0.02768	0.74766	0.07679	N	D	0.67886	0.05972	T	0.80673	T	0.70081	Gain_of_catalytic_residue_at_S22_(P_=_0.0118),_Loss_of_disorder_(P_=_0.1054),_Loss_of_stability_(P_=_0.1786),_Gain_of_glycosylation_at_S22_(P_=_0.2508),_Loss_of_solvent_accessibility_(P_=_0.3543)	0.41593	0.45129
rs750766974	14:94383162-94383162	A	missense_variant	ENST00000448921.5:c.76G>T	ENSP00000416066.1:p.Asp26Tyr	649	76	26	D/Y	Gat/Tat	3.985e-06	0	0	0	0	0	8.825e-06	0	0	-	-	deleterious(0)	possibly_damaging(0.88)	21.3	deleterious(0.788)	T	0.5819	0.0488199	D	0.54614	0.47684	0.70896	1.53798	-0.312799	0.87591	0.40985	0.74766	0.07679	N	D	0.72243	0.27677	D	0.90013	T	0.75158	Gain_of_catalytic_residue_at_E25_(P_=_0.0028),_Loss_of_disorder_(P_=_0.028),_Gain_of_phosphorylation_at_D26_(P_=_0.0972),_Loss_of_glycosylation_at_S22_(P_=_0.2308),_Loss_of_stability_(P_=_0.5104)	0.49471	0.57729
rs750766974	14:94383162-94383162	T	missense_variant	ENST00000448921.5:c.76G>A	ENSP00000416066.1:p.Asp26Asn	649	76	26	D/N	Gat/Aat	3.985e-06	6.157e-05	0	0	0	0	0	0	0	-	-	deleterious(0.02)	benign(0.133)	16.03	neutral(0.394)	T	0.23719	-0.180113	T	0.26719	0.63169	0.49435	1.15531	-0.529144	0.87591	0.40985	0.74766	0.07679	N	D	0.69478	0.09137	D	0.87219	T	0.72692	-	-	0.57729
rs766542592	14:94383165-94383165	T	missense_variant	ENST00000448921.5:c.73G>A	ENSP00000416066.1:p.Glu25Lys	646	73	25	E/K	Gag/Aag	1.993e-05	0	0.0001446	0	0	0	0	0	0	uncertain_significance	-	tolerated(0.15)	benign(0.059)	0.754	neutral(0.245)	T	0.28742	-0.147255	T	0.13359	0.40231	0.47107	0.54398	-0.957061	0.8775	0.28415	0.74766	0.09284	N	D	0.60992	0.06739	T	0.8098	T	0.66247	Gain_of_ubiquitination_at_E25_(P_=_0.0082),_Gain_of_methylation_at_E25_(P_=_0.0112),_Gain_of_catalytic_residue_at_S22_(P_=_0.0228),_Loss_of_stability_(P_=_0.0804),_Gain_of_solvent_accessibility_(P_=_0.1505)	0.67259	0.57729
rs753867893	14:94383167-94383167	A	missense_variant	ENST00000448921.5:c.71C>T	ENSP00000416066.1:p.Ala24Val	644	71	24	A/V	gCt/gTt	7.973e-06	6.158e-05	0	0	0	0	8.833e-06	0	0	-	-	tolerated(0.15)	benign(0.168)	14.69	neutral(0.256)	T	0.34506	-0.111591	T	0.13999	0.43893	0.50978	0.86873	-0.721616	0.87194	0.27981	0.74766	0.12958	N	D	0.57503	0.18931	T	0.7523	T	0.63095	Gain_of_catalytic_residue_at_A24_(P_=_0.001),_Loss_of_disorder_(P_=_0.0977),_Loss_of_glycosylation_at_S22_(P_=_0.2314),_Gain_of_loop_(P_=_0.3485),_Loss_of_sheet_(P_=_0.437)	0.53066	0.35607
rs755088914	14:94383168-94383168	A	missense_variant	ENST00000448921.5:c.70G>T	ENSP00000416066.1:p.Ala24Ser	643	70	24	A/S	Gct/Tct	7.974e-06	0	0	0	0	0	1.767e-05	0	0	-	-	deleterious(0.02)	possibly_damaging(0.573)	20.6	deleterious(0.580)	T	0.57194	0.041128	D	0.40759	0.43771	0.45856	1.46918	-0.347658	0.87671	0.41733	0.74766	0.12958	N	D	0.51609	0.25452	D	0.88004	T	0.76961	Gain_of_catalytic_residue_at_V19_(P_=_0.0045),_Gain_of_disorder_(P_=_0.035),_Gain_of_relative_solvent_accessibility_(P_=_0.09),_Gain_of_solvent_accessibility_(P_=_0.1683),_Loss_of_glycosylation_at_S22_(P_=_0.1921)	0.51598	0.58565
rs1379209512	14:94383170-94383170	T	missense_variant	ENST00000448921.5:c.68T>A	ENSP00000416066.1:p.Leu23Gln	641	68	23	L/Q	cTg/cAg	-	-	-	-	-	-	-	-	-	-	-	tolerated(0.27)	benign(0.411)	16.17	neutral(0.167)	D	0.62714	0.0858179	D	0.33264	0.30254	0.5188	1.13664	-0.541011	0.88377	0.24489	0.74766	0.12252	N	D	0.65984	0.33425	D	0.86439	T	0.75609	Gain_of_catalytic_residue_at_L18_(P_=_4e-04),_Gain_of_disorder_(P_=_0.0227),_Gain_of_solvent_accessibility_(P_=_0.0789),_Gain_of_relative_solvent_accessibility_(P_=_0.09),_Loss_of_stability_(P_=_0.1633)	0.62805	0.47622
rs751555333	14:94383174-94383174	T	missense_variant	ENST00000448921.5:c.64T>A	ENSP00000416066.1:p.Ser22Thr	637	64	22	S/T	Tcc/Acc	-	-	-	-	-	-	-	-	-	-	-	tolerated(0.23)	benign(0.412)	11.44	neutral(0.175)	T	0.52912	0.00917236	T	0.30863	0.15485	0.44158	0.864163	-0.724805	0.8791	0.09725	0.74766	0.01961	N	D	0.64947	0.04968	D	0.85215	T	0.69899	Gain_of_catalytic_residue_at_L18_(P_=_9e-04),_Loss_of_disorder_(P_=_0.1146),_Loss_of_helix_(P_=_0.1706),_Loss_of_glycosylation_at_S22_(P_=_0.2021),_Gain_of_loop_(P_=_0.2045)	0.43889	0.60381
rs1448214480	14:94383177-94383177	G	missense_variant	ENST00000448921.5:c.61G>C	ENSP00000416066.1:p.Val21Leu	634	61	21	V/L	Gtc/Ctc	-	-	-	-	-	-	-	-	-	-	-	tolerated(0.11)	benign(0)	0.001	neutral(0.272)	T	0.44148	-0.0519729	T	0.08632	0.01615	0.38003	0.0183866	-1.93551	0.86963	0.0061	0.74766	0.12075	N	D	0.69439	0.04778	T	0.61142	T	0.5339	Gain_of_catalytic_residue_at_L18_(P_=_3e-04),_Loss_of_helix_(P_=_0.079),_Gain_of_loop_(P_=_0.0851),_Gain_of_disorder_(P_=_0.1763),_Loss_of_glycosylation_at_S22_(P_=_0.2112)	0.5597	0.06538
rs780969205	14:94383183-94383183	T	missense_variant	ENST00000448921.5:c.55G>A	ENSP00000416066.1:p.Val19Ile	628	55	19	V/I	Gtc/Atc	3.993e-06	0	0	0	0	0	8.858e-06	0	0	-	-	tolerated(0.06)	benign(0.05)	5.343	neutral(0.326)	T	0.48241	-0.0242744	T	0.09379	0.17011	0.41967	0.403579	-1.07337	0.88143	0.29674	0.74766	0.04234	N	T	0.47667	0.04391	D	0.88475	T	0.72576	Gain_of_catalytic_residue_at_L18_(P_=_0),_Loss_of_loop_(P_=_0.0512),_Gain_of_helix_(P_=_0.132),_Gain_of_glycosylation_at_S22_(P_=_0.2337),_Loss_of_disorder_(P_=_0.2528)	0.37511	0.56016
rs1176919060	14:94383188-94383188	T	missense_variant	ENST00000448921.5:c.50G>A	ENSP00000416066.1:p.Cys17Tyr	623	50	17	C/Y	tGc/tAc	0	0	0	0	0	0	0	0	0	-	-	tolerated(0.07)	benign(0.127)	8.486	neutral(0.330)	D	0.65016	0.106783	T	0.20457	0.06621	0.75154	1.2246	-0.486049	0.97172	0.23565	0.74766	0.04375	N	D	0.72952	0.08473	D	0.95556	D	0.88232	Gain_of_catalytic_residue_at_A13_(P_=_0),_Loss_of_loop_(P_=_0.1242),_Gain_of_glycosylation_at_S22_(P_=_0.1573),_Loss_of_helix_(P_=_0.3949),_Gain_of_phosphorylation_at_C17_(P_=_0.4356)	0.83955	0.60381
rs1250083377	14:94383189-94383189	G	missense_variant	ENST00000448921.5:c.49T>C	ENSP00000416066.1:p.Cys17Arg	622	49	17	C/R	Tgc/Cgc	3.996e-06	0	0	0	0	0	8.873e-06	0	0	-	-	deleterious(0.01)	possibly_damaging(0.866)	22.5	deleterious(0.741)	D	0.71449	0.173558	D	0.59362	0.25711	0.76573	2.43027	0.0203633	0.97172	0.36471	0.74766	0.04375	N	D	0.81916	0.34112	D	0.97514	D	0.91505	Gain_of_catalytic_residue_at_A13_(P_=_0),_Gain_of_helix_(P_=_0.1736),_Loss_of_glycosylation_at_S22_(P_=_0.2102),_Loss_of_loop_(P_=_0.2897),_Gain_of_methylation_at_C17_(P_=_0.3171)	0.89684	0.60381
rs1473667365	14:94383192-94383192	G	missense_variant	ENST00000448921.5:c.46T>C	ENSP00000416066.1:p.Cys16Arg	619	46	16	C/R	Tgc/Cgc	3.999e-06	0	0	0	0	0	0	0	3.267e-05	-	-	deleterious(0.01)	possibly_damaging(0.861)	23.1	deleterious(0.739)	D	0.79378	0.258361	D	0.71278	0.49208	0.75251	2.3596	0.000129288	0.97172	0.12747	0.74766	0.06398	N	D	0.7697	0.36533	D	0.97046	D	0.91186	Gain_of_catalytic_residue_at_A13_(P_=_0),_Gain_of_methylation_at_C16_(P_=_0.1183),_Gain_of_MoRF_binding_(P_=_0.3356),_Gain_of_loop_(P_=_0.3485),_Loss_of_helix_(P_=_0.3949)	0.93326	0.62911
rs768352001	14:94383197-94383197	A	missense_variant	ENST00000448921.5:c.41G>T	ENSP00000416066.1:p.Gly14Val	614	41	14	G/V	gGc/gTc	1.602e-05	0	0.0001157	0	0	0	0	0	0	uncertain_significance	-	deleterious(0)	possibly_damaging(0.696)	22.8	deleterious(0.694)	D	0.6445	0.101446	D	0.46128	0.73807	0.7505	2.50433	0.0408229	0.97732	0.39533	0.74766	0.22238	N	D	0.83443	0.2998	D	0.9775	D	0.97522	Gain_of_catalytic_residue_at_A13_(P_=_0),_Gain_of_loop_(P_=_0.1069),_Gain_of_helix_(P_=_0.1736),_Loss_of_sheet_(P_=_0.437),_Gain_of_MoRF_binding_(P_=_0.7544)	0.67259	0.49914
rs1566759056	14:94383203-94383203	G	missense_variant	ENST00000448921.5:c.35T>C	ENSP00000416066.1:p.Leu12Pro	608	35	12	L/P	cTg/cCg	-	-	-	-	-	-	-	-	-	pathogenic	-	deleterious(0)	probably_damaging(0.998)	26.3	deleterious(0.919)	D	0.89999	0.401463	D	0.9001	0.9541	0.75664	5.28031	0.513115	0.9421	0.60425	0.74766	0.11215	N	D	0.93134	0.38714	D	0.95383	D	0.92173	Gain_of_catalytic_residue_at_A13_(P_=_0),_Loss_of_helix_(P_=_0.0558),_Loss_of_stability_(P_=_0.063),_Gain_of_loop_(P_=_0.1069),_Gain_of_disorder_(P_=_0.1398)	0.89763	0.64647
rs377747242	14:94383204-94383204	T	missense_variant	ENST00000448921.5:c.34C>A	ENSP00000416066.1:p.Leu12Met	607	34	12	L/M	Ctg/Atg	4.013e-06	0	0	0	0	0	8.935e-06	0	0	-	-	deleterious(0)	probably_damaging(0.998)	23.2	deleterious(0.919)	D	0.70603	0.164355	D	0.54849	0.72501	0.55638	4.11744	0.364723	0.94114	0.31179	0.74766	0.11215	N	D	0.75979	0.32911	D	0.94864	D	0.8647	-	-	0.64647
rs1296175763	14:94383212-94383212	T	missense_variant	ENST00000448921.5:c.26T>A	ENSP00000416066.1:p.Ile9Asn	599	26	9	I/N	aTc/aAc	4.024e-06	0	0	0	0	0	8.97e-06	0	0	-	-	deleterious(0)	benign(0.192)	23.2	neutral(0.463)	D	0.6156	0.0759128	D	0.65446	0.38489	0.7071	2.56339	0.0566333	0.88066	0.85714	0.74766	0.03198	N	D	0.58335	0.12085	D	0.87348	T	0.75925	Gain_of_catalytic_residue_at_I9_(P_=_0),_Loss_of_stability_(P_=_0.0098),_Gain_of_disorder_(P_=_0.0368),_Loss_of_helix_(P_=_0.2022),_Gain_of_phosphorylation_at_S4_(P_=_0.4117)	0.78321	0.28011
rs773588978	14:94383215-94383215	A	missense_variant	ENST00000448921.5:c.23G>T	ENSP00000416066.1:p.Gly8Val	596	23	8	G/V	gGc/gTc	4.033e-06	0	0	0	0	0	8.997e-06	0	0	-	-	deleterious(0)	benign(0.175)	15.85	neutral(0.461)	D	0.68011	0.136724	T	0.27155	0.30122	0.40955	0.963545	-0.655919	0.97732	0.2689	0.74766	0.02659	N	D	0.63358	0.1775	D	0.95563	D	0.87554	Gain_of_catalytic_residue_at_A13_(P_=_0),_Loss_of_disorder_(P_=_0.086),_Gain_of_glycosylation_at_S3_(P_=_0.324),_Loss_of_phosphorylation_at_S4_(P_=_0.3885),_Loss_of_helix_(P_=_0.4763)	0.51761	0.57729
rs773588978	14:94383215-94383215	T	missense_variant	ENST00000448921.5:c.23G>A	ENSP00000416066.1:p.Gly8Asp	596	23	8	G/D	gGc/gAc	8.065e-06	0	0	0	0	0	1.799e-05	0	0	-	-	deleterious(0)	possibly_damaging(0.729)	20.5	deleterious(0.710)	D	0.69977	0.157588	D	0.43535	0.71397	0.53983	1.35348	-0.410456	0.97732	0.2689	0.74766	0.02659	N	D	0.63452	0.32302	D	0.97143	D	0.88869	Gain_of_catalytic_residue_at_A13_(P_=_0),_Gain_of_phosphorylation_at_S3_(P_=_0.1604),_Gain_of_helix_(P_=_0.1736),_Gain_of_disorder_(P_=_0.2366),_Gain_of_glycosylation_at_S3_(P_=_0.4781)	0.69945	0.57729
rs1410013401	14:94383216-94383216	T	missense_variant	ENST00000448921.5:c.22G>A	ENSP00000416066.1:p.Gly8Ser	595	22	8	G/S	Ggc/Agc	4.031e-06	0	0	0	0	0	8.992e-06	0	0	-	-	deleterious(0.03)	benign(0.115)	14.24	neutral(0.373)	D	0.65433	0.110774	T	0.12988	0.2302	0.4513	0.435088	-1.045	0.97713	0.06107	0.74766	0.02659	N	D	0.61038	0.09095	D	0.94795	D	0.84753	Gain_of_catalytic_residue_at_A13_(P_=_0),_Gain_of_disorder_(P_=_0.0939),_Gain_of_phosphorylation_at_S3_(P_=_0.1113),_Gain_of_glycosylation_at_G8_(P_=_0.3431),_Loss_of_helix_(P_=_0.4763)	0.53715	0.57729
rs370038282	14:94383217-94383217	A	missense_variant	ENST00000448921.5:c.21G>T	ENSP00000416066.1:p.Trp7Cys	594	21	7	W/C	tgG/tgT	8.068e-06	6.209e-05	0	0	0	0	9.001e-06	0	0	-	-	deleterious(0.01)	benign(0.068)	18.03	neutral(0.410)	D	0.69109	0.148303	D	0.44934	0.09962	0.7301	0.826849	-0.751027	0.9756	0.22094	0.74766	0.0365	N	D	0.71602	0.35338	D	0.95404	D	0.86247	-	-	0.57729
rs370038282	14:94383217-94383217	T	stop_gained	ENST00000448921.5:c.21G>A	ENSP00000416066.1:p.Trp7Ter	594	21	7	W/*	tgG/tgA	-	-	-	-	-	-	-	-	-	likely_pathogenic	-	-	-	33	-	D	0.96596	0.569311	-	-	0.35531	-	1.55001	-0.306864	-	0.22094	0.74766	0.0365	N	-	-	-	-	-	-	-	-	-	-
rs140814100	14:94383221-94383221	A	missense_variant	ENST00000448921.5:c.17C>T	ENSP00000416066.1:p.Ser6Leu	590	17	6	S/L	tCg/tTg	7.282e-05	0.0001866	0	0	0.0004899	0	4.515e-05	0	3.269e-05	other,uncertain_significance	2394452	deleterious(0.05)	benign(0.133)	18.15	neutral(0.356)	T	0.41002	-0.0720206	T	0.13739	0.60493	0.4816	1.35022	-0.412278	0.87989	0.42757	0.74766	0.05213	N	D	0.79156	0.13241	D	0.88669	T	0.74269	-	-	0.57729
rs776904334	14:94383225-94383225	T	missense_variant	ENST00000448921.5:c.13G>A	ENSP00000416066.1:p.Val5Ile	586	13	5	V/I	Gtc/Atc	4.065e-06	0	0	0	0	0	9.074e-06	0	0	-	-	tolerated(1)	benign(0.005)	0.054	neutral(0.000)	T	0.39178	-0.0832936	T	0.05119	0.06371	0.31371	0.13752	-1.42886	0.88143	0.03168	0.74766	0.04533	N	D	0.654	0.04153	T	0.72545	T	0.65978	Gain_of_catalytic_residue_at_P2_(P_=_0),_Loss_of_glycosylation_at_S2_(P_=_0.2267),_Gain_of_disorder_(P_=_0.2384),_Gain_of_phosphorylation_at_P4_(P_=_0.321),_Loss_of_helix_(P_=_0.4763)	0.43067	0.25572
rs1484441543	14:94383227-94383227	A	missense_variant	ENST00000448921.5:c.11C>T	ENSP00000416066.1:p.Ser4Phe	584	11	4	S/F	tCt/tTt	-	-	-	-	-	-	-	-	-	-	-	deleterious(0.04)	probably_damaging(0.931)	24.5	deleterious(0.726)	D	0.68905	0.146132	D	0.43934	0.69469	0.70923	2.02662	-0.107211	0.93474	0.47038	0.74766	0.12945	N	D	0.74362	0.09163	D	0.94784	D	0.86317	Gain_of_catalytic_residue_at_P2_(P_=_0),_Loss_of_disorder_(P_=_0.0129),_Loss_of_glycosylation_at_P2_(P_=_0.0441),_Gain_of_helix_(P_=_0.062),_Loss_of_phosphorylation_at_S4_(P_=_0.1779)	0.42085	0.64647
rs1259380442	14:94383228-94383228	G	missense_variant	ENST00000448921.5:c.10T>C	ENSP00000416066.1:p.Ser4Pro	583	10	4	S/P	Tct/Cct	-	-	-	-	-	-	-	-	-	-	-	deleterious(0)	benign(0.26)	20.6	deleterious(0.472)	D	0.71381	0.172816	D	0.5972	0.47684	0.55009	1.39631	-0.386621	0.93414	0.60425	0.74766	0.12945	N	D	0.80524	0.33685	D	0.92115	D	0.84914	Gain_of_catalytic_residue_at_P2_(P_=_0),_Gain_of_glycosylation_at_S4_(P_=_0.0337),_Gain_of_loop_(P_=_0.1069),_Loss_of_disorder_(P_=_0.1525),_Loss_of_phosphorylation_at_S4_(P_=_0.1779)	0.4274	0.64647
rs759598955	14:94383230-94383230	A	missense_variant	ENST00000448921.5:c.8C>T	ENSP00000416066.1:p.Ser3Phe	581	8	3	S/F	tCt/tTt	8.155e-06	0.000125	0	0	0	0	0	0	0	-	-	tolerated(0.06)	benign(0.062)	18.31	neutral(0.327)	T	0.39723	-0.0799512	T	0.12872	0.12037	0.72251	0.931786	-0.677773	0.88533	0.4735	0.74766	0.10935	N	D	0.74635	0.09491	T	0.77958	T	0.67144	Gain_of_catalytic_residue_at_P2_(P_=_2e-04),_Loss_of_disorder_(P_=_0.016),_Loss_of_glycosylation_at_P2_(P_=_0.0453),_Loss_of_helix_(P_=_0.2022),_Loss_of_phosphorylation_at_S3_(P_=_0.2402)	0.35559	0.10303
rs759598955	14:94383230-94383230	C	missense_variant	ENST00000448921.5:c.8C>G	ENSP00000416066.1:p.Ser3Cys	581	8	3	S/C	tCt/tGt	-	-	-	-	-	-	-	-	-	-	-	deleterious(0.01)	probably_damaging(0.91)	23.3	deleterious(0.768)	T	0.60657	0.0684317	D	0.47848	0.25023	0.50968	1.75669	-0.212224	0.88924	0.4735	0.74766	0.10935	N	D	0.74039	0.31306	D	0.89514	T	0.79245	Gain_of_catalytic_residue_at_P2_(P_=_0),_Loss_of_disorder_(P_=_0.0073),_Loss_of_glycosylation_at_P2_(P_=_0.0396),_Loss_of_helix_(P_=_0.2022),_Loss_of_phosphorylation_at_S3_(P_=_0.2402)	0.42576	0.43825
rs759598955	14:94383230-94383230	T	missense_variant	ENST00000448921.5:c.8C>A	ENSP00000416066.1:p.Ser3Tyr	581	8	3	S/Y	tCt/tAt	4.078e-06	0	0	0	0	0	9.099e-06	0	0	-	-	deleterious(0.03)	possibly_damaging(0.655)	22.9	deleterious(0.595)	T	0.60675	0.0685765	D	0.48049	0.46672	0.71821	1.57421	-0.295103	0.88767	0.4735	0.74766	0.10935	N	D	0.76915	0.29822	D	0.88141	T	0.78113	Gain_of_catalytic_residue_at_P2_(P_=_2e-04),_Loss_of_disorder_(P_=_0.0346),_Loss_of_glycosylation_at_P2_(P_=_0.0521),_Loss_of_phosphorylation_at_S4_(P_=_0.2844),_Loss_of_helix_(P_=_0.4763)	0.35722	0.43825
rs142288916	14:94383233-94383233	A	missense_variant	ENST00000448921.5:c.5C>T	ENSP00000416066.1:p.Pro2Leu	578	5	2	P/L	cCg/cTg	2.864e-05	0.0001256	0	0	0	0	2.737e-05	0	6.551e-05	-	-	deleterious(0.03)	possibly_damaging(0.598)	19.02	deleterious(0.572)	T	0.35194	-0.107435	T	0.28345	0.71583	0.70376	1.36024	-0.406633	0.87671	0.67838	0.74766	0.11202	N	D	0.80396	0.15837	D	0.85979	T	0.76499	-	-	0.50365
rs757174326	14:94383234-94383234	A	missense_variant	ENST00000448921.5:c.4C>T	ENSP00000416066.1:p.Pro2Ser	577	4	2	P/S	Ccg/Tcg	4.111e-06	0	0	0	0	0	9.163e-06	0	0	-	-	tolerated(0.34)	benign(0.196)	1.016	neutral(0.041)	T	0.55081	0.0252086	T	0.23783	0.3092	0.70635	0.698588	-0.842658	0.87116	0.16811	0.74766	0.11202	N	D	0.7226	0.19523	D	0.81561	T	0.70581	Gain_of_catalytic_residue_at_S3_(P_=_0),_Loss_of_glycosylation_at_P2_(P_=_0.0243),_Gain_of_phosphorylation_at_P2_(P_=_0.0467),_Gain_of_disorder_(P_=_0.0992),_Gain_of_helix_(P_=_0.1736)	0.29408	0.303
rs1057516555	14:94383237-94383237	C	start_lost	ENST00000448921.5:c.1A>G	ENSP00000416066.1:p.Met1?	574	1	1	M/V	Atg/Gtg	-	-	-	-	-	-	-	-	-	likely_pathogenic	-	deleterious(0)	probably_damaging(0.912)	23.8	deleterious(0.808)	D	0.77463	0.237886	D	0.52588	0.4199	0.63327	3.42354	0.2472	0.8822	0.60909	0.74766	0.25044	N	D	0.99541	-	D	0.92143	D	0.91678	Gain_of_catalytic_residue_at_P2_(P_=_0),_Loss_of_glycosylation_at_P2_(P_=_0.0607),_Loss_of_disorder_(P_=_0.2003),_Loss_of_helix_(P_=_0.2022),_Loss_of_solvent_accessibility_(P_=_0.3103)	0.99568	-
rs1555369299	14:94383237-94383238	T	start_lost,start_retained_variant,5_prime_UTR_variant	ENST00000448921.5:c.1del	-	573-574	?-1	?-1	-	-	-	-	-	-	-	-	-	-	-	pathogenic	-	-	-	-	-	-	-	-	-	-	-	-	-	-	-	-	-	-	-	-	-	-	-	-	-	-	-	-	-
rs111758929	14:94383242-94383242	G	splice_acceptor_variant	ENST00000448921.5:c.-4-1G>C	-	-	-	-	-	-	-	-	-	-	-	-	-	-	-	-	-	-	-	28	-	-	-	-	-	-	-	-	-	-	-	-	-	-	-	-	-	-	-	-	-	-	-	-	-
rs112021273	14:94383243-94383243	A	splice_acceptor_variant	ENST00000448921.5:c.-4-2A>T	-	-	-	-	-	-	-	-	-	-	-	-	-	-	-	-	-	-	-	33	-	-	-	-	-	-	-	-	-	-	-	-	-	-	-	-	-	-	-	-	-	-	-	-	-
rs112927301	14:94388558-94388558	T	splice_donor_variant	ENST00000448921.5:c.-5+2T>A	-	-	-	-	-	-	-	-	-	-	-	-	-	-	-	-	-	-	-	29.9	-	-	-	-	-	-	-	-	-	-	-	-	-	-	-	-	-	-	-	-	-	-	-	-	-
rs775786225	14:94388559-94388559	A	splice_donor_variant	ENST00000448921.5:c.-5+1G>T	-	-	-	-	-	-	-	-	-	-	-	-	-	-	-	-	-	-	-	28.5	-	-	-	-	-	-	-	-	-	-	-	-	-	-	-	-	-	-	-	-	-	-	-	-	-
rs775786225	14:94388559-94388559	T	splice_donor_variant	ENST00000448921.5:c.-5+1G>A	-	-	-	-	-	-	-	-	-	-	-	-	-	-	-	-	-	-	-	27.6	-	-	-	-	-	-	-	-	-	-	-	-	-	-	-	-	-	-	-	-	-	-	-	-	-
rs1187731535	14:94389011-94389011	T	splice_acceptor_variant	ENST00000448921.5:c.-300-1G>A	-	-	-	-	-	-	-	-	-	-	-	-	-	-	-	-	-	-	-	12.93	-	-	-	-	-	-	-	-	-	-	-	-	-	-	-	-	-	-	-	-	-	-	-	-	-
rs1487248485	14:94389012-94389012	C	splice_acceptor_variant	ENST00000448921.5:c.-300-2A>G	-	-	-	-	-	-	-	-	-	-	-	-	-	-	-	-	-	-	-	16.59	-	-	-	-	-	-	-	-	-	-	-	-	-	-	-	-	-	-	-	-	-	-	-	-	-
rs1566767477	14:94390418-94390418	G	splice_donor_variant	ENST00000448921.5:c.-301+2T>C	-	-	-	-	-	-	-	-	-	-	-	-	-	-	-	-	-	-	-	8.234	-	-	-	-	-	-	-	-	-	-	-	-	-	-	-	-	-	-	-	-	-	-	-	-	-
rs951289479	14:94390419-94390419	A	splice_donor_variant	ENST00000448921.5:c.-301+1G>T	-	-	-	-	-	-	-	-	-	-	-	-	-	-	-	-	-	-	-	4.969	-	-	-	-	-	-	-	-	-	-	-	-	-	-	-	-	-	-	-	-	-	-	-	-	-
rs951289479	14:94390419-94390419	G	splice_donor_variant	ENST00000448921.5:c.-301+1G>C	-	-	-	-	-	-	-	-	-	-	-	-	-	-	-	-	-	-	-	2.081	-	-	-	-	-	-	-	-	-	-	-	-	-	-	-	-	-	-	-	-	-	-	-	-	-
CDS: Coding Sequence
gnomAD_AF: alele frequencies as provided by gnomAD database (AFR - African/African American; AMR - Latino/Admixed American; ASJ - Ashkenazi Jewish (ASJ); EAS - East Asian; FIN - European – Finnish; NFE - European - non-Finnish; OTH – Other; SAS - South Asian)
D: Deleterious or Damaging; T: Tolerated; N: Neutral; or U: Unknown
[truncated: 19 more columns]
